# Supplementary material for: Poly(N-isopropylacrylamide-co-l-proline)-catalyzed Claisen–Schmidt and Knoevenagel condensations: unexpected enhanced catalytic activity of the polymer catalyst
Source: Royal Society of Chemistry journal article supplement (doi:10.1039/c7ra09412d), 2017-01-01

ESI for

**Poly(*N*-isopropylacrylamide-*co*-*L*-proline)-catalyzed  
Claisen-Schmidt and Knoevenagel condensations:  
unexpected enhanced catalytic activity of the polymer  
catalyst**

Hao Zhang,<sup>‡ab</sup> Mengting Han,<sup>‡ab</sup> Tian Chen,<sup>a</sup> Lin Xu<sup>ab</sup> and Lei Yu<sup>\*ab</sup>

<sup>a</sup>Institute of Pesticide, School of Chemistry and Chemical Engineering and School of Horticulture and Plant Protection, Yangzhou University, Yangzhou, Jiangsu 225002, China

<sup>b</sup>Jiangsu Yangnong Chemical Group Co. Ltd., Yangzhou, Jiangsu 225002, China

<sup>‡</sup>H. Z. and M. H. contributed equally

\* Corresponding author

Email: yulei@yzu.edu.cn.

**Table of Contents**

|                                                                                         |     |
|-----------------------------------------------------------------------------------------|-----|
| Condition optimizations.....                                                            | S2  |
| Original <sup>1</sup> H NMR spectra of benzaldehyde in mechanism study experiments..... | S5  |
| GC data and spectra of the polymer absorption test.....                                 | S9  |
| NMR Spectra of the products.....                                                        | S11 |

## S1 Condition optimizations

**Table S1.** Screenings of the catalyst and additive.<sup>a</sup>

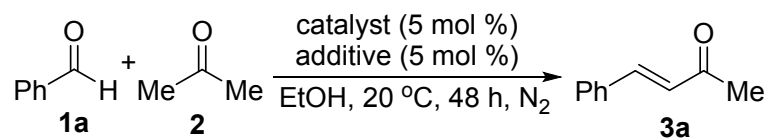

| Entry    | Catalyst                | Additive                        | Yield (%) <sup>b</sup> |
|----------|-------------------------|---------------------------------|------------------------|
| 1        | <i>L</i> -Proline       | -                               | 44                     |
| 2        | <i>L</i> -Proline       | 1-Methylpiperazine              | 55                     |
| 3        | <i>L</i> -Proline       | Morpholine                      | 61                     |
| 4        | <i>L</i> -Proline       | Pyrrolidine                     | 49                     |
| <b>5</b> | <b><i>L</i>-Proline</b> | <b>Piperazine</b>               | <b>70</b>              |
| 6        | <i>L</i> -Proline       | Et <sub>2</sub> NH              | 36                     |
| 7        | <i>L</i> -Proline       | ( <i>i</i> -Pr) <sub>2</sub> NH | 34                     |
| 8        | <i>L</i> -Proline       | Pyridine                        | 32                     |
| 9        | <i>L</i> -Proline       | Et <sub>3</sub> N               | 28                     |
| 10       | <i>L</i> -Proline       | 1-Methylpiperidine              | 43                     |
| 11       | <i>L</i> -Proline       | PhNH <sub>2</sub>               | 48                     |
| 12       | -                       | Piperazine                      | 15                     |
| 13       | <i>L</i> -Cysteine      | Piperazine                      | 29                     |
| 14       | <i>L</i> -Histidine     | Piperazine                      | 22                     |
| 15       | <i>L</i> - Arginine     | Piperazine                      | 12                     |
| 16       | <i>L</i> -Norvaline     | Piperazine                      | 52                     |

|    |                               |            |    |
|----|-------------------------------|------------|----|
| 17 | 5-Aminopentanoic acid         | Piperazine | 17 |
| 18 | Piperidine-2-carboxylic acid  | Piperazine | 25 |
| 19 | Pyrrolidine-3-carboxylic acid | Piperazine | 32 |

<sup>a</sup>1 mmol of **1a**, 3 mmol of acetone and 1 mL of EtOH were employed.

<sup>b</sup>Isolated yields of **3a** based on **1a**.

**Table S2.** Condition optimizations.<sup>a</sup>

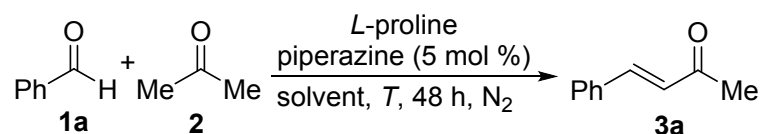

| Entry | Solvent                     | <b>2/1a</b> <sup>b</sup> | Cat% <sup>c</sup> | <i>T</i>          | Yield            |
|-------|-----------------------------|--------------------------|-------------------|-------------------|------------------|
|       |                             |                          |                   | (°C) <sup>d</sup> | (%) <sup>e</sup> |
| 1     | EtOH                        | 3                        | 5                 | 20                | 70               |
| 2     | EtOH/H <sub>2</sub> O (4:1) | 3                        | 5                 | 20                | 64               |
| 3     | EtOH/H <sub>2</sub> O (1:1) | 3                        | 5                 | 20                | 60               |
| 4     | MeOH                        | 3                        | 5                 | 20                | 50               |
| 5     | <i>i</i> -PrOH              | 3                        | 5                 | 20                | 66               |
| 6     | <i>t</i> -BuOH              | 3                        | 5                 | 20                | 57               |
| 7     | Acetone                     | -                        | 5                 | 20                | 37               |
| 8     | Acetone/EtOH (90:10)        | -                        | 5                 | 20                | 46               |
| 9     | EtOH                        | 2                        | 5                 | 20                | 68               |
| 10    | EtOH                        | 5                        | 5                 | 20                | 64               |
| 11    | EtOH                        | 3                        | 3                 | 20                | 58               |
| 12    | EtOH                        | 3                        | 0                 | 20                | 15               |

|    |      |   |    |    |    |
|----|------|---|----|----|----|
| 13 | EtOH | 3 | 10 | 20 | 64 |
| 14 | EtOH | 3 | 20 | 20 | 45 |
| 15 | EtOH | 3 | 5  | 40 | 67 |

---

<sup>a</sup>1 mmol of **1a**, and 1 mL of solvent were employed.

<sup>b</sup>Molar ratio of acetone vs. **1a**.

<sup>c</sup>Catalyst amount (mol %) based on **1a**.

<sup>d</sup>Reaction temperature.

<sup>e</sup>Isolated yields of **3a** based on **1a**.

## S2 Original $^1\text{H}$ NMR spectra of benzaldehyde in mechanism study experiments

**Instruction:** The original spectra were given here to confirm that the chemical shifts of aldehyde-H were referred to the internal standard  $\text{Me}_4\text{Si}$  at 0 ppm. Although the solubility of *L*-proline was low in  $\text{CDCl}_3$ , it obviously affected the chemical shift of the aldehyde-H, which moved to the low field region (from 10.028 ppm to 10.030 ppm).

### S3.1 Without *L*-proline ( $\text{CDCl}_3$ , 400 MHz; aldehyde-H at 10.028 ppm; $\text{Me}_4\text{Si}$ at 0 ppm)

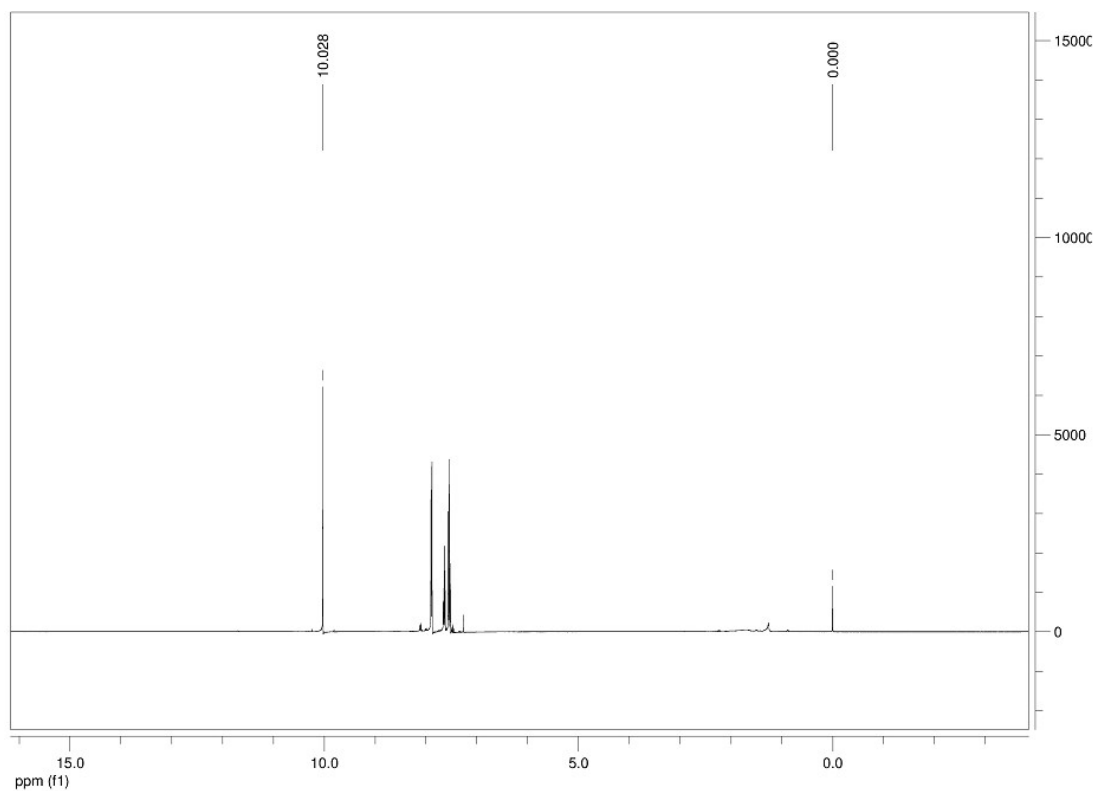

**S3.2 After adding *L*-proline (CDCl<sub>3</sub>, 400 MHz; aldehyde-H at 10.030 ppm; Me<sub>4</sub>Si at 0 ppm)**

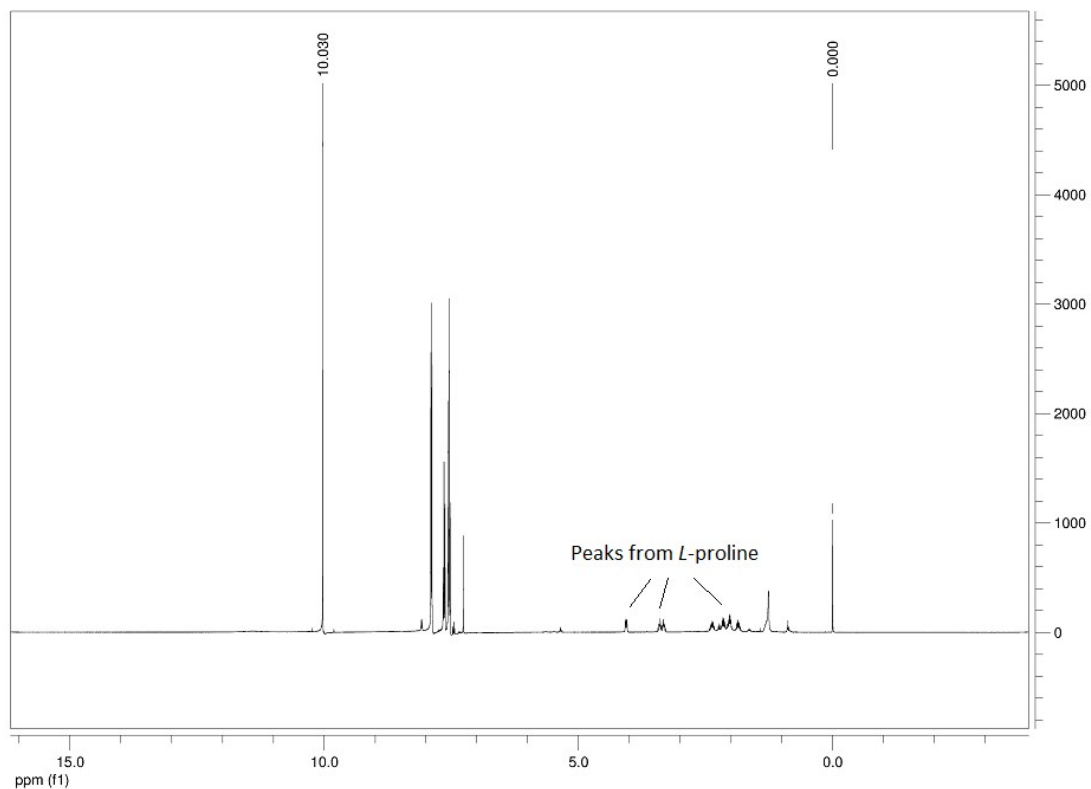

**S3.3 Without *L*-proline (Methanol-D<sub>4</sub>, 400 MHz; aldehyde-H at 9.989 ppm; Me<sub>4</sub>Si at 0 ppm)**

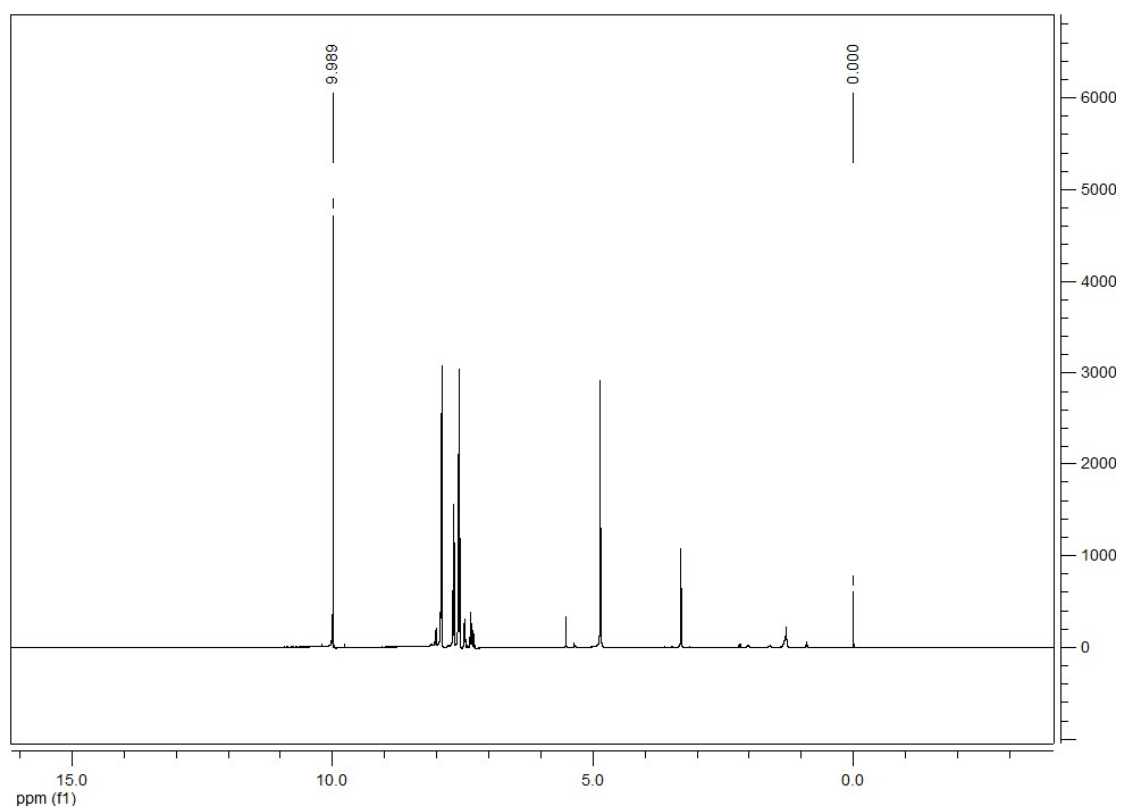

**S3.4 After adding *L*-proline (Methanol-D<sub>4</sub>, 400 MHz; aldehyde-H at 9.992 ppm; Me<sub>4</sub>Si at 0 ppm)**

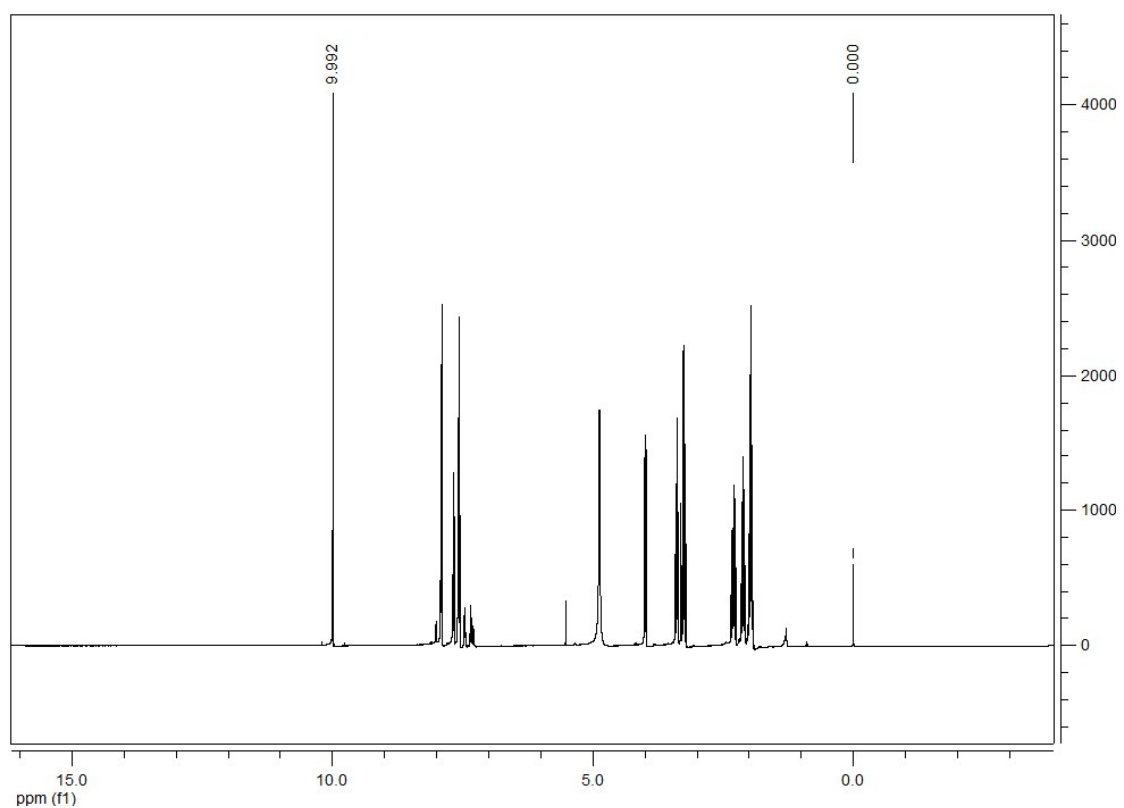



### S3 GC data and spectra of the polymer absorption test

#### S3.1 GC analysis data of the sample PhCHO/EtOH without polymer 8

##### 1st time

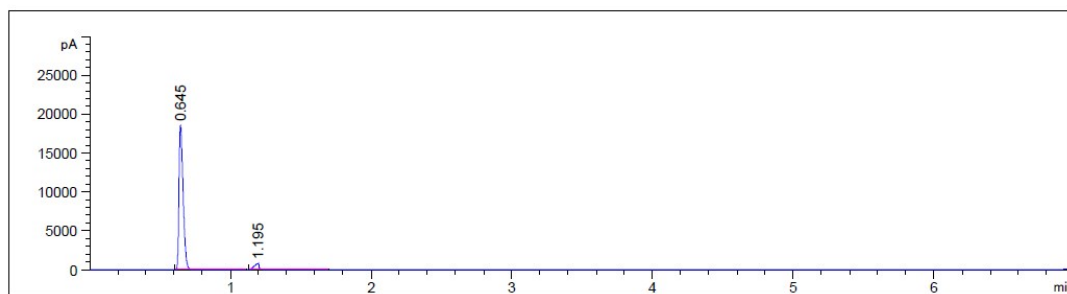

| Compound | Retention time/min | Peak wide/min | Peak area | Peak area % | PhCHO / EtOH |
|----------|--------------------|---------------|-----------|-------------|--------------|
| PhCHO    | 1.195              | 0.0399        | 792.13324 | 4.77030     | 0.05009      |
| EtOH     | 0.645              | 0.0318        | 18516.6   | 95.22970    |              |

##### 2nd time

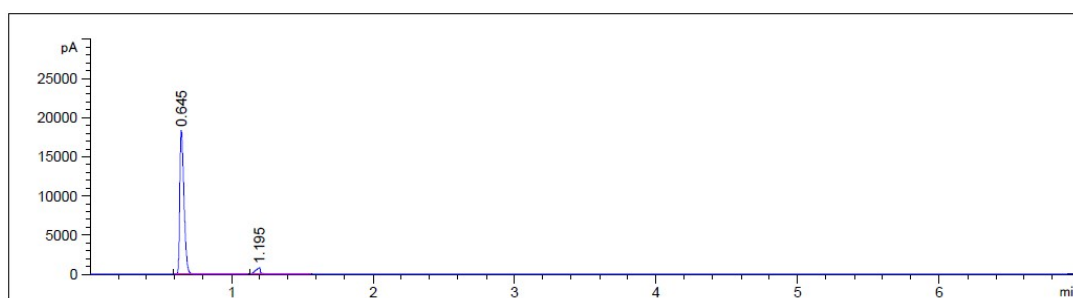

| Compound | Retention time/min | Peak wide/min | Peak area | Peak area % | PhCHO / EtOH |
|----------|--------------------|---------------|-----------|-------------|--------------|
| PhCHO    | 1.195              | 0.0373        | 793.18103 | 4.77037     | 0.05009      |
| EtOH     | 0.645              | 0.0319        | 18318.2   | 95.22963    |              |

##### 3rd time

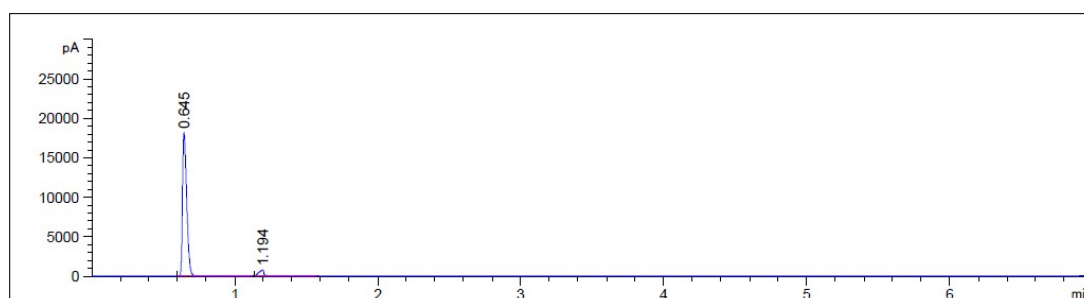

| Compound        | Retention time/min | Peak wide/min | Peak area | Peak area % | PhCHO / EtOH   |
|-----------------|--------------------|---------------|-----------|-------------|----------------|
| PhCHO           | 1.194              | 0.0361        | 769.51642 | 4.76944     | 0.05008        |
| EtOH            | 0.645              | 0.0318        | 18123.6   | 95.23056    |                |
| <b>Average:</b> |                    |               |           |             | <b>0.05009</b> |

### S3.2 GC analysis data of the sample PhCHO/EtOH after adding polymer 8

#### 1st time

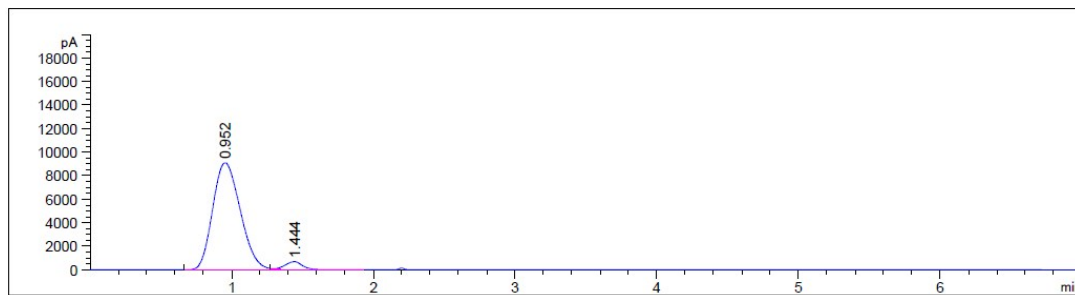

| Compound | Retention time/min | Peak wide/min | Peak area  | Peak area % | PhCHO / EtOH |
|----------|--------------------|---------------|------------|-------------|--------------|
| PhCHO    | 1.444              | 0.1059        | 667.29846  | 4.34212     | 0.04539      |
| EtOH     | 0.952              | 0.2125        | 9075.36621 | 95.65788    |              |

#### 2nd time

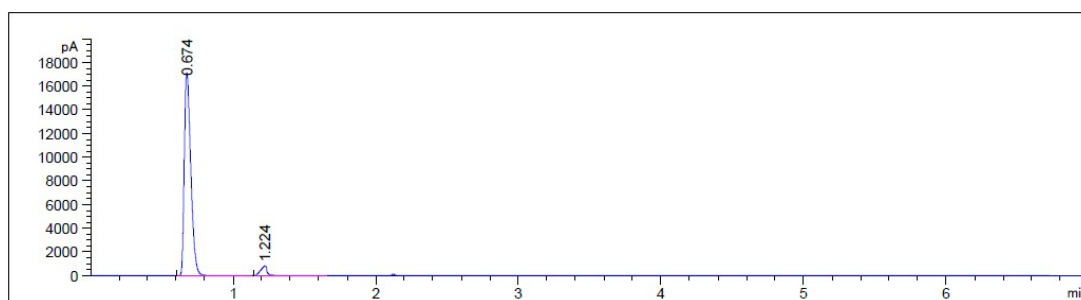

| Compound | Retention time/min | Peak wide/min | Peak area | Peak area % | PhCHO / EtOH |
|----------|--------------------|---------------|-----------|-------------|--------------|
| PhCHO    | 1.224              | 0.0476        | 808.49634 | 4.27906     | 0.04470      |
| EtOH     | 0.674              | 0.0488        | 17106.3   | 95.72094    |              |

#### 3rd time

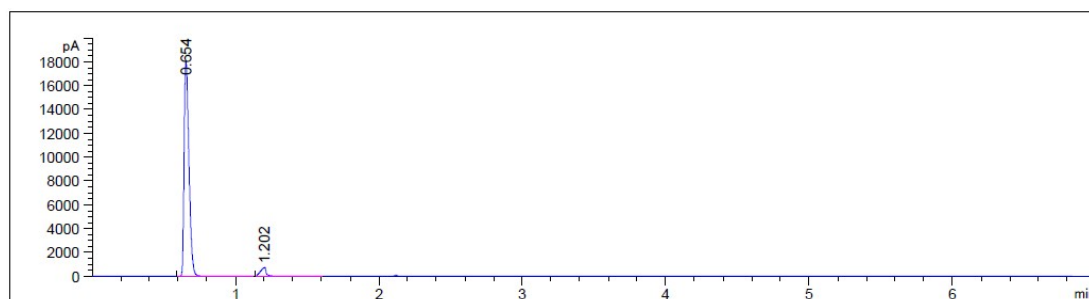

| Compound        | Retention time/min | Peak wide/min | Peak area | Peak area % | PhCHO / EtOH   |
|-----------------|--------------------|---------------|-----------|-------------|----------------|
| PhCHO           | 1.202              | 0.0407        | 706.14410 | 4.28743     | 0.04479        |
| EtOH            | 0.654              | 0.0361        | 17985.0   | 95.71257    |                |
| <b>Average:</b> |                    |               |           |             | <b>0.04496</b> |

### S4 NMR Spectra of the products

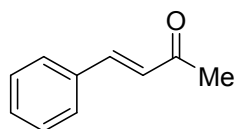

**3a**, CDCl<sub>3</sub>, 600 MHz

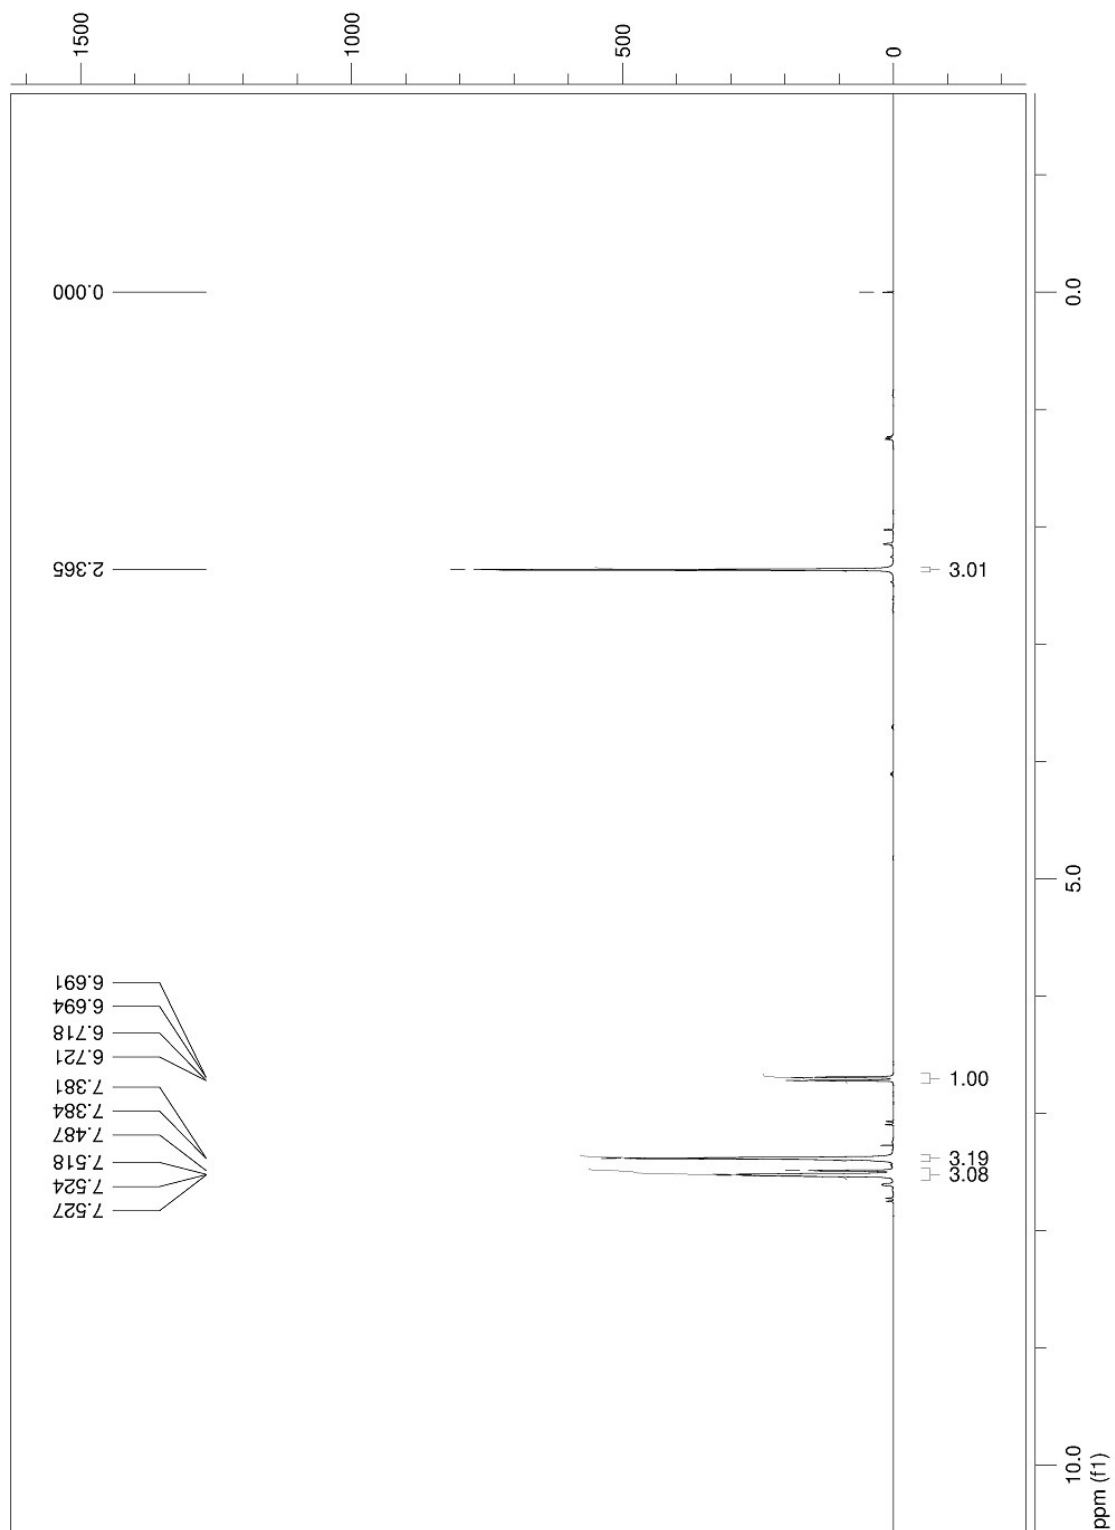

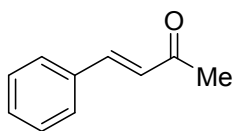

**3a**, CDCl<sub>3</sub>, 150 MHz

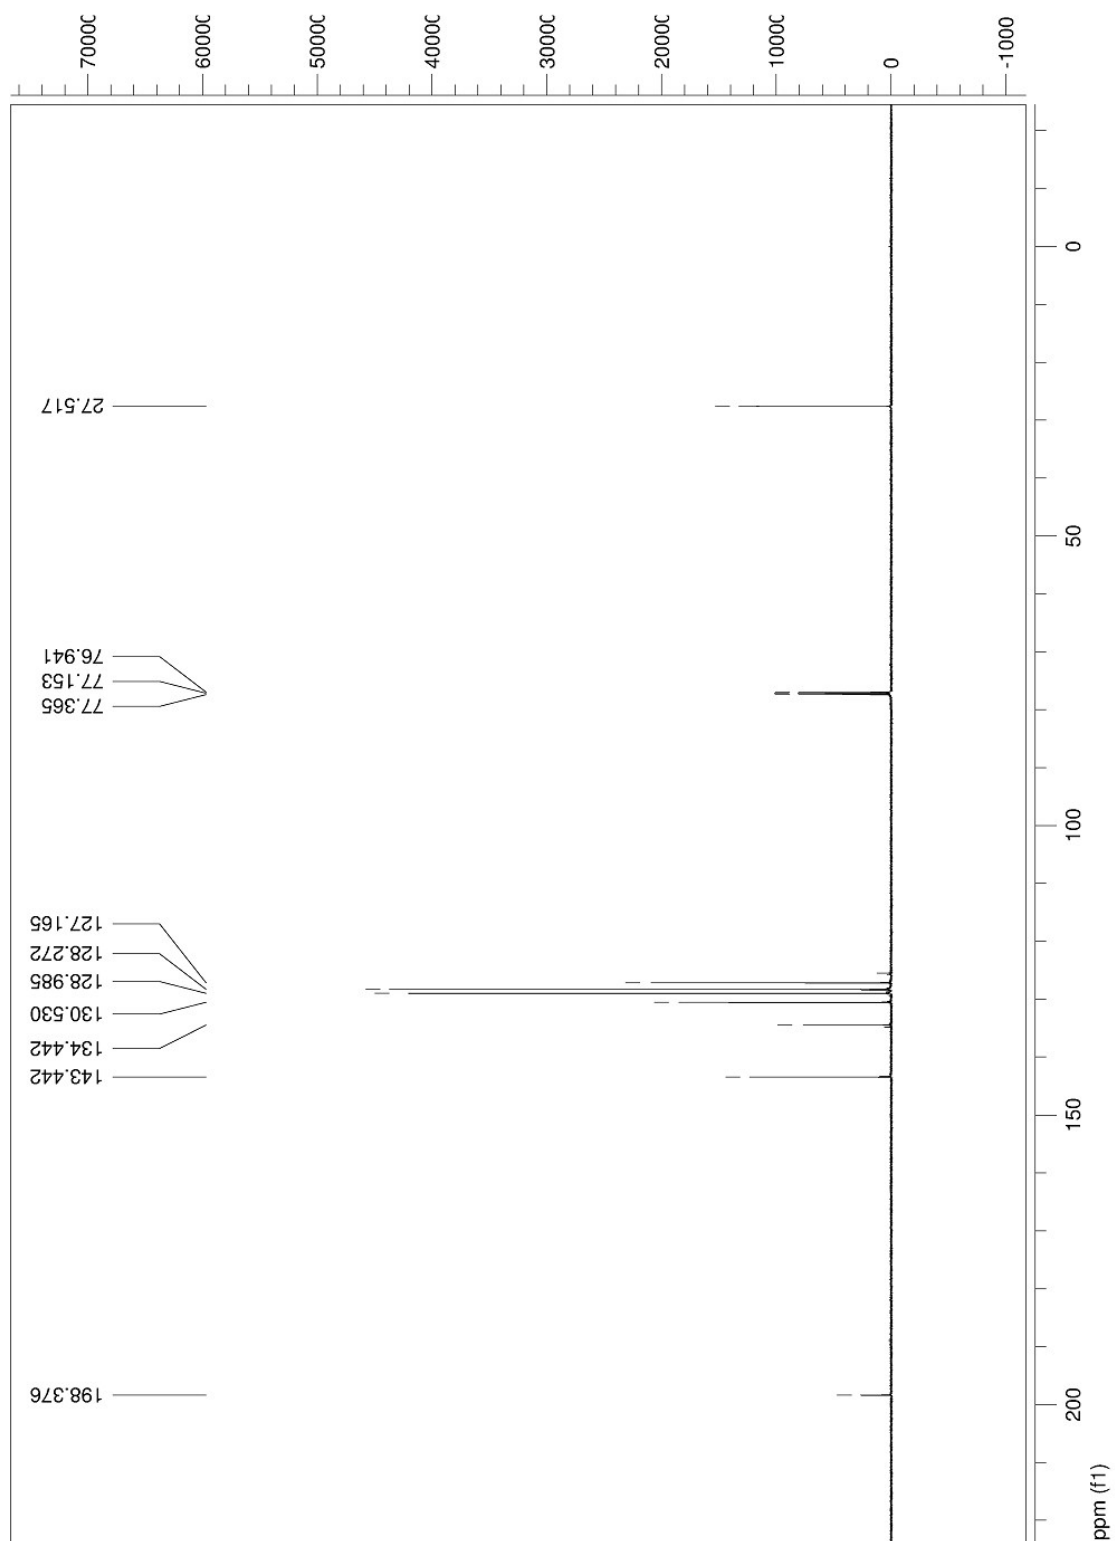

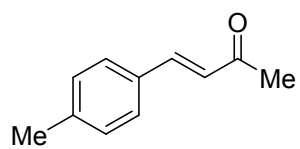

**3b**, CDCl<sub>3</sub>, 600 MHz

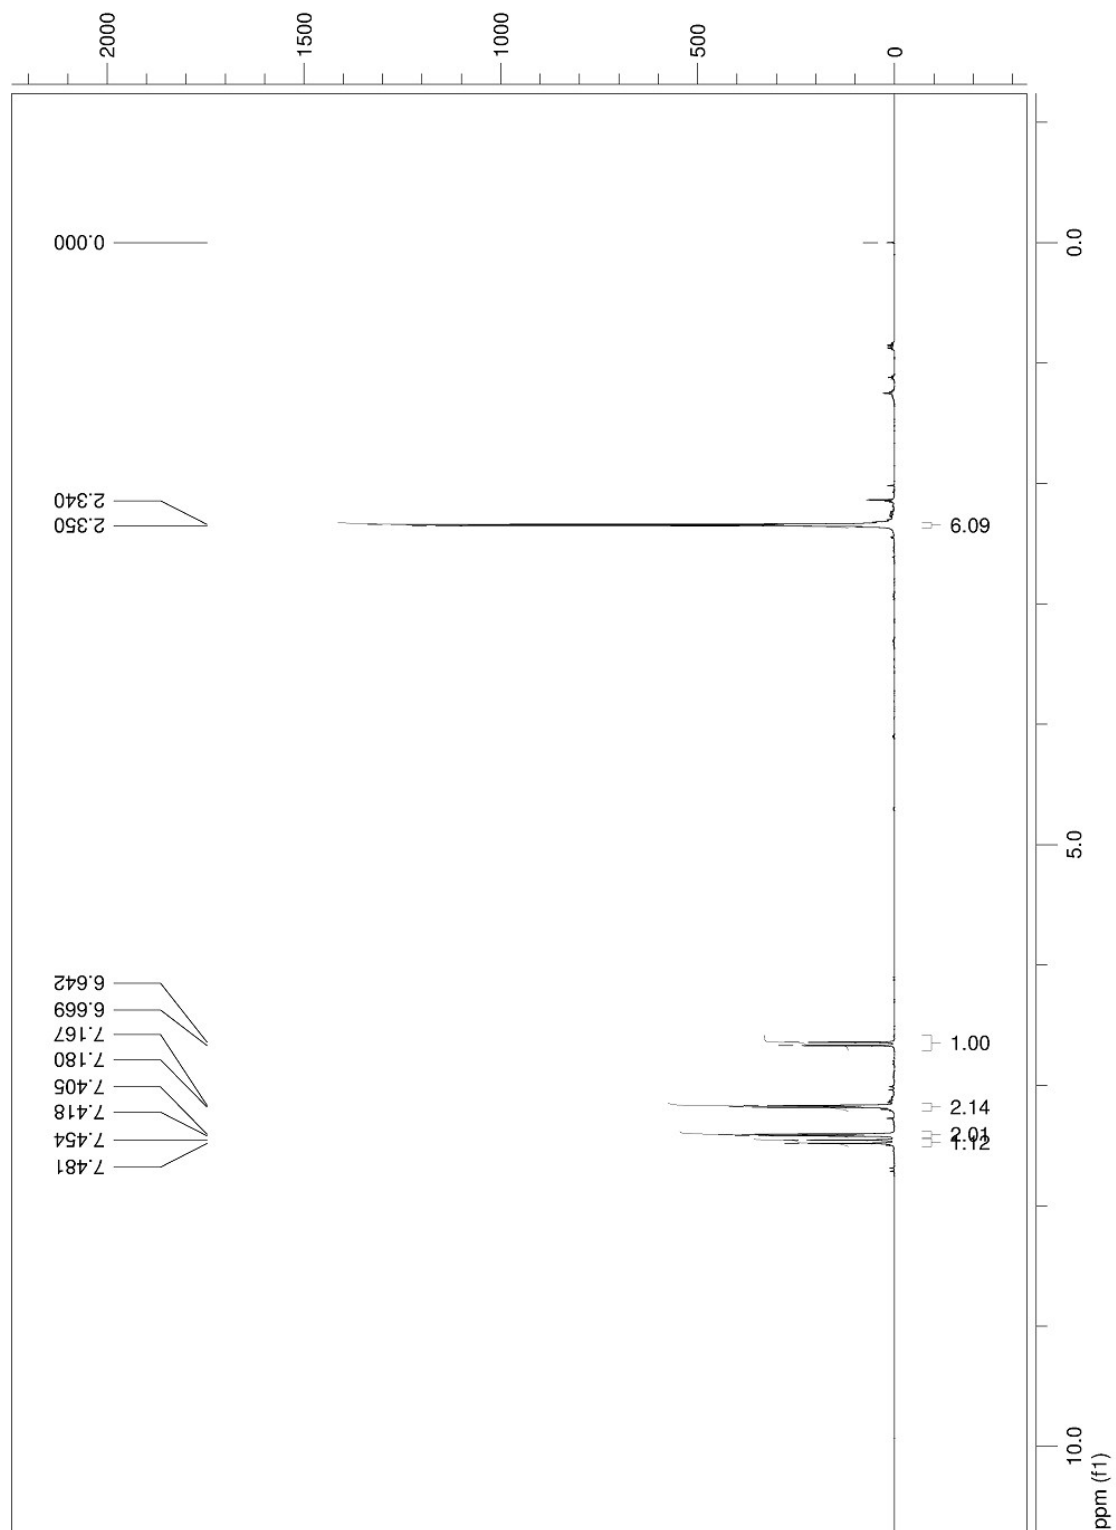



**3b**, CDCl<sub>3</sub>, 150 MHz

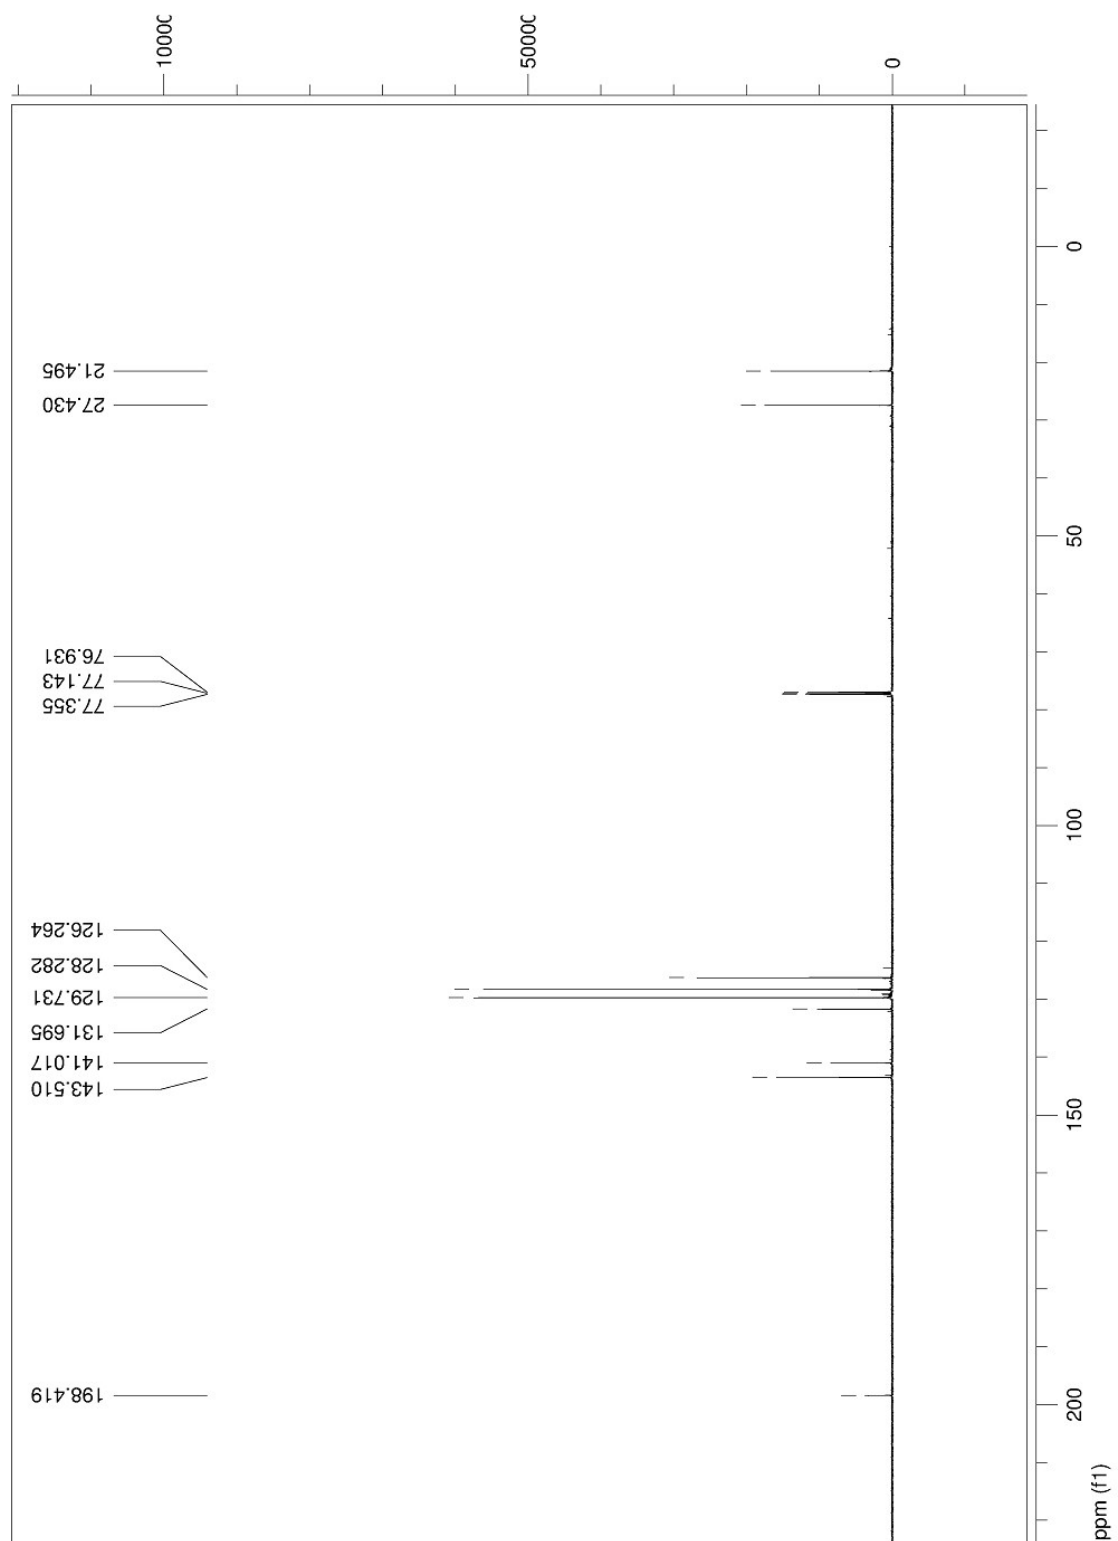

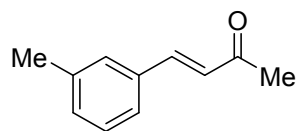

**3c**, CDCl<sub>3</sub>, 400 MHz

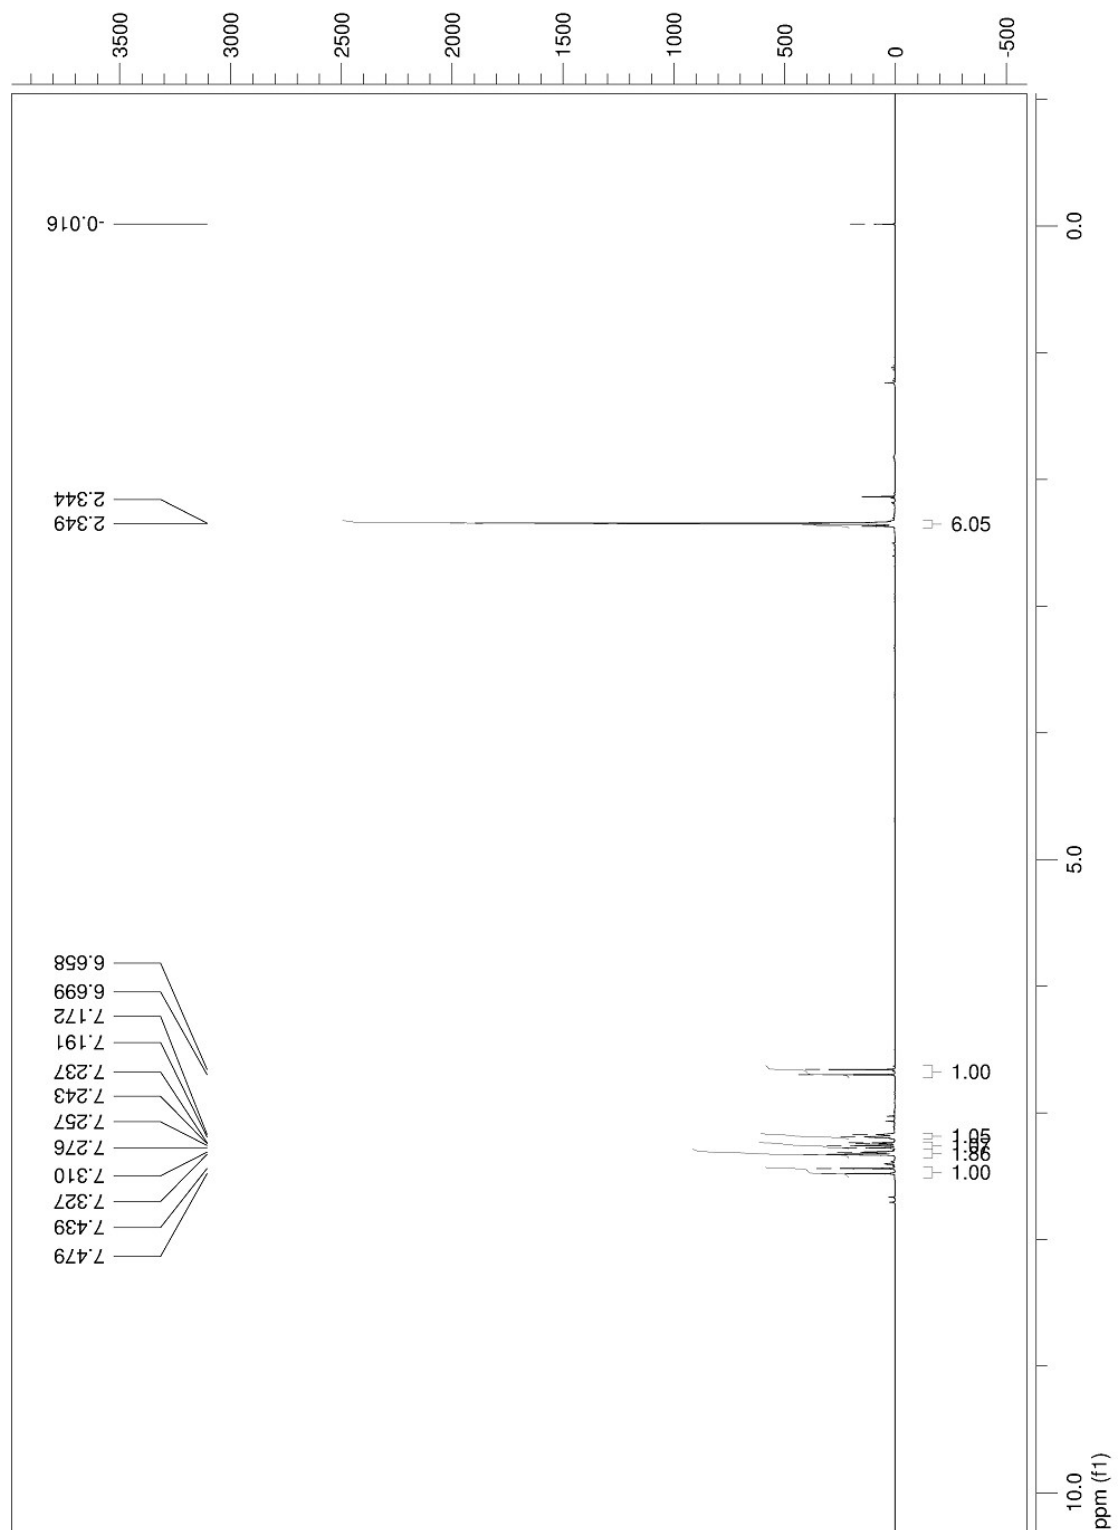



**3c**, CDCl<sub>3</sub>, 100 MHz

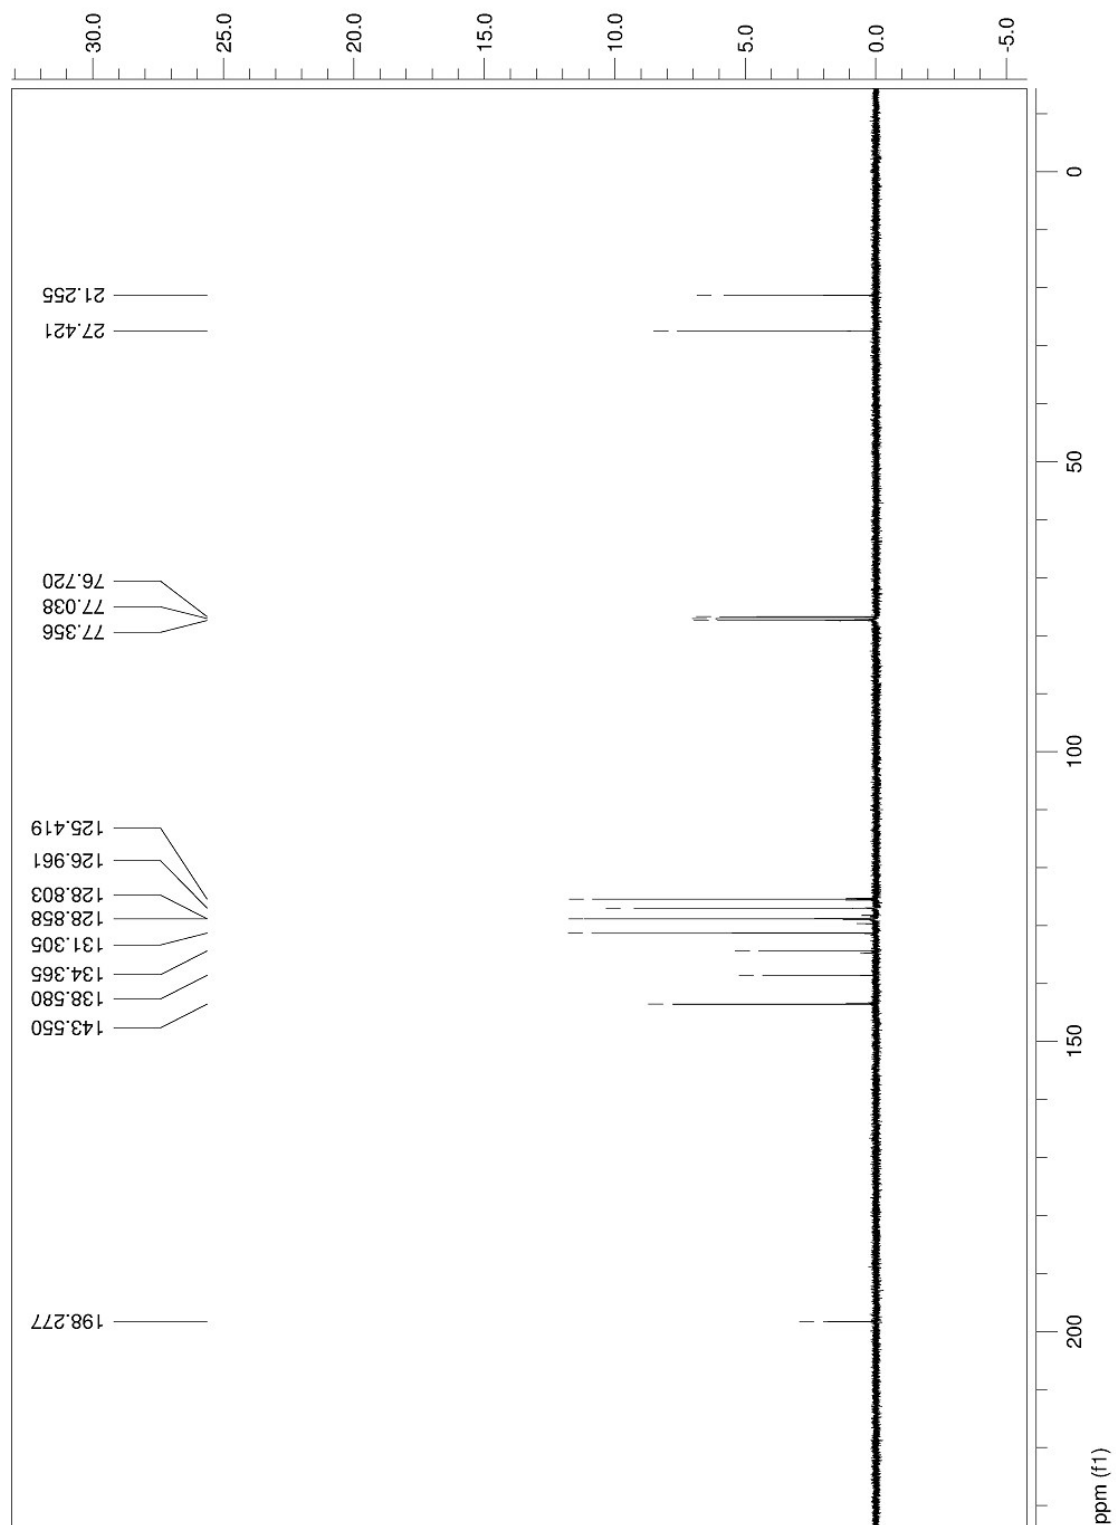



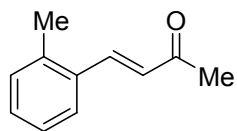

**3d**, CDCl<sub>3</sub>, 600 MHz

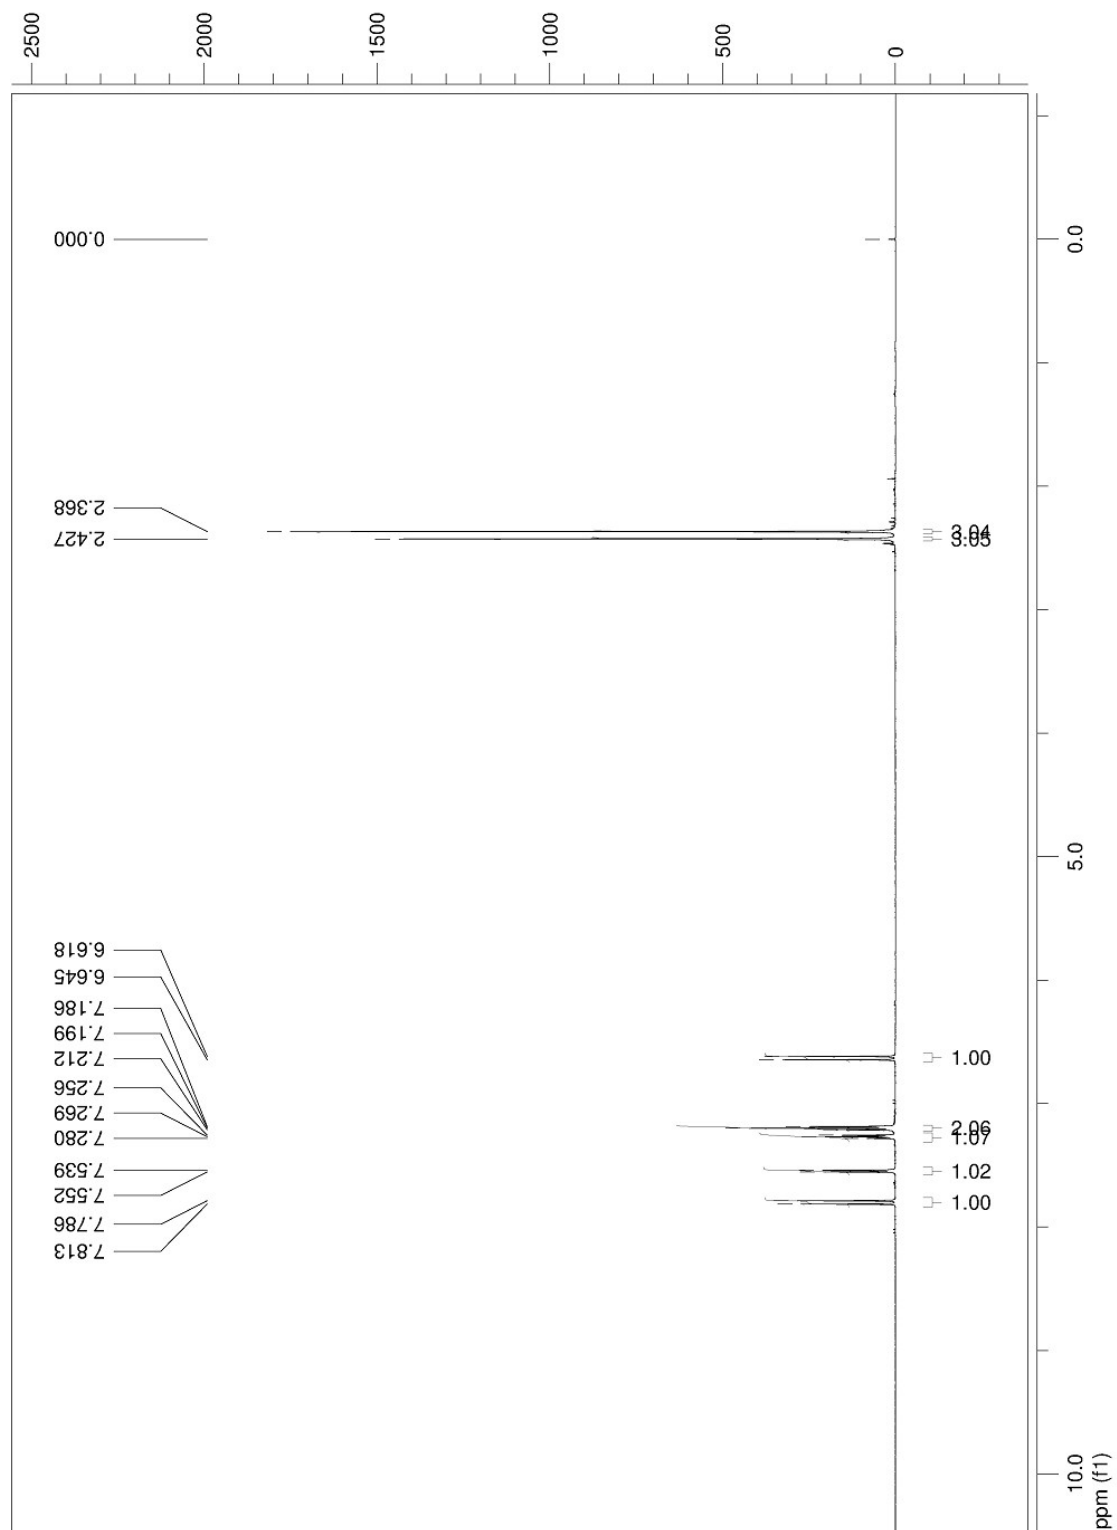



**3d**, CDCl<sub>3</sub>, 150 MHz

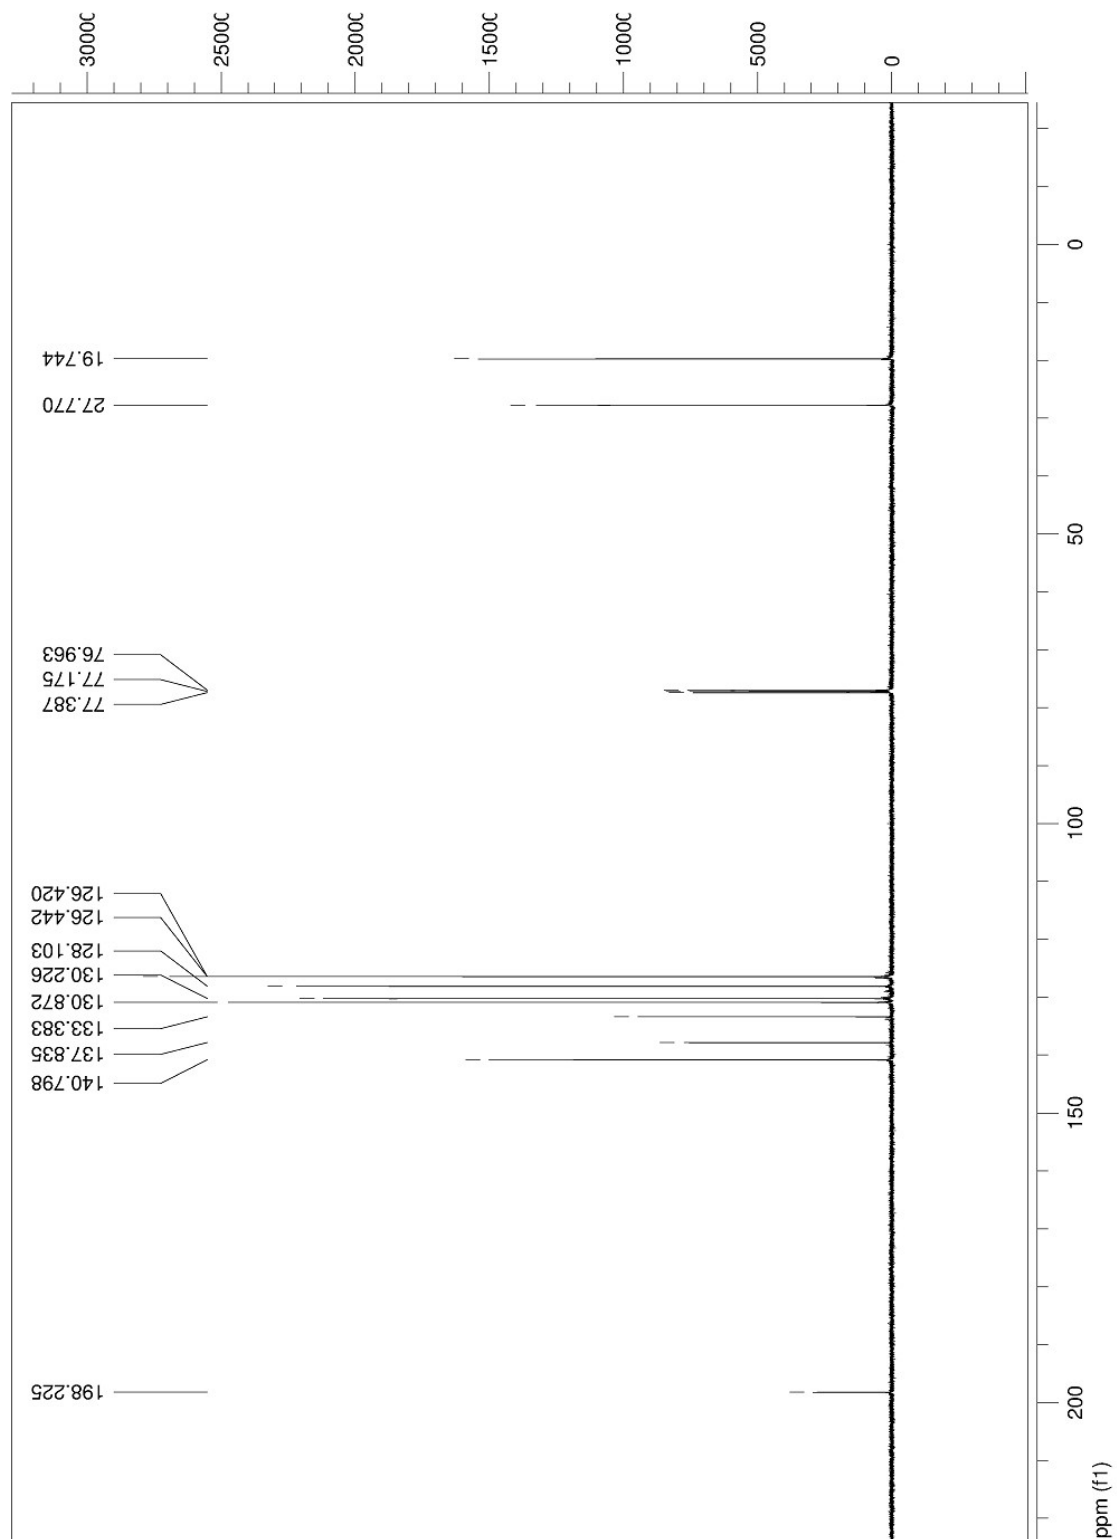

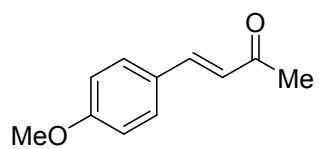

3e, CDCl<sub>3</sub>, 600 MHz

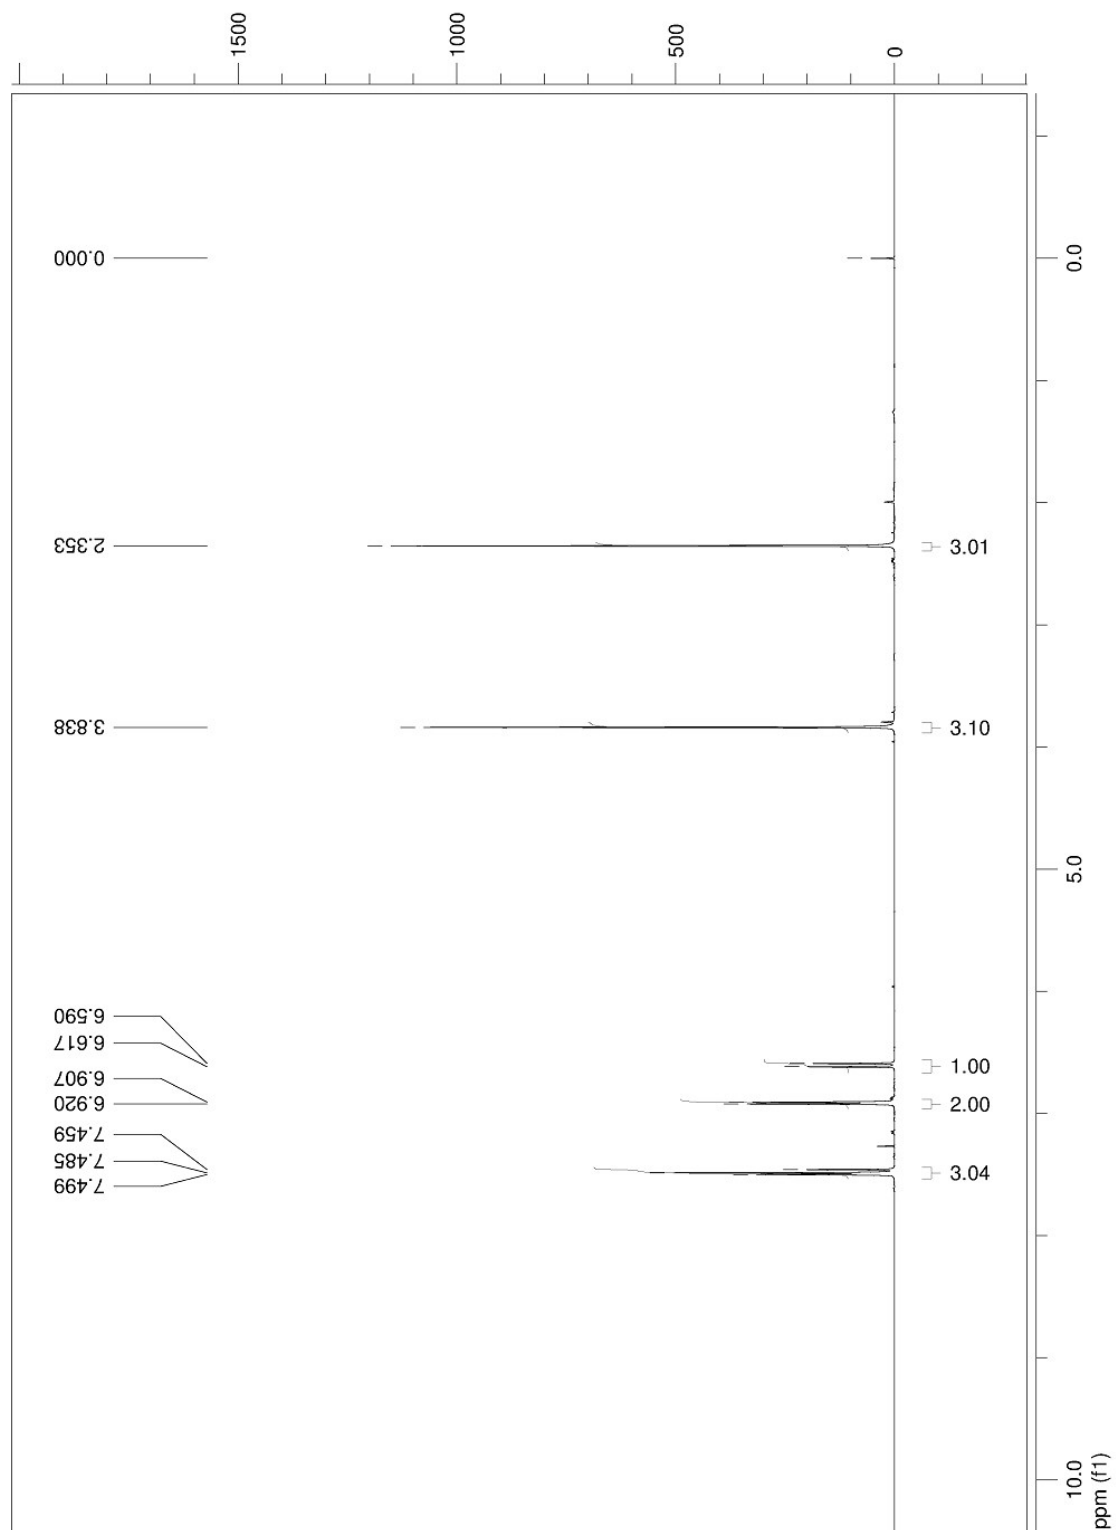



3e, CDCl<sub>3</sub>, 150 MHz

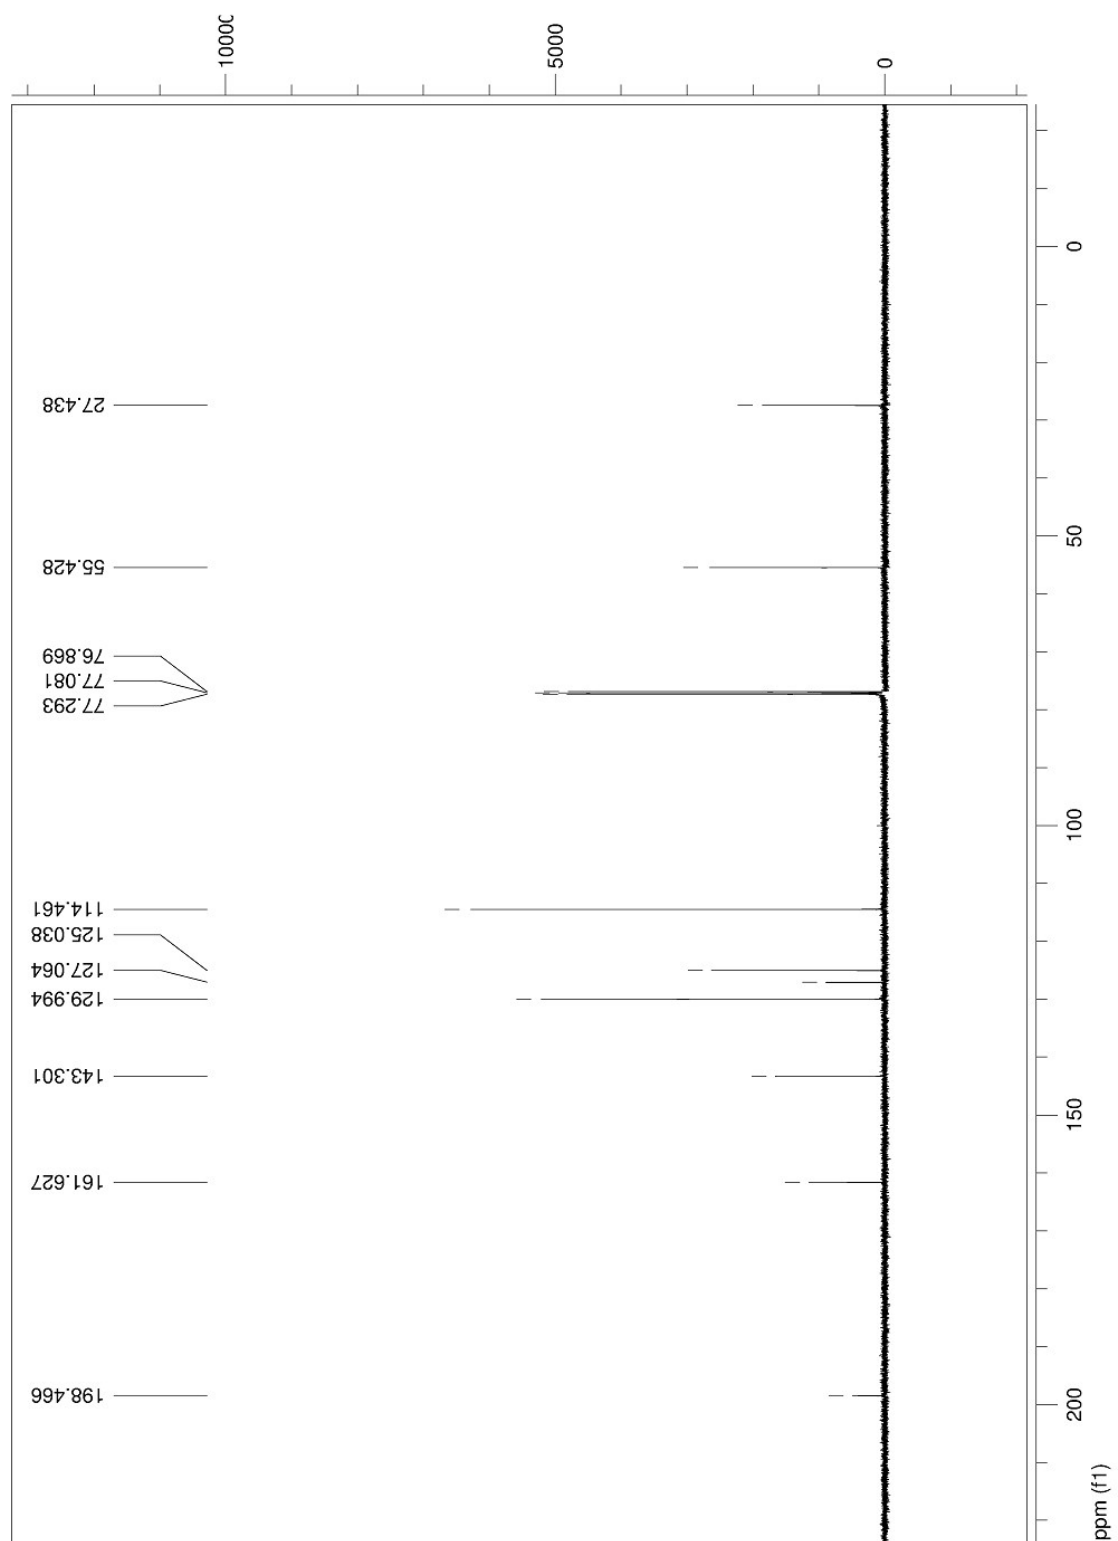

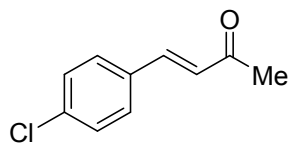

**3f**, CDCl<sub>3</sub>, 600 MHz

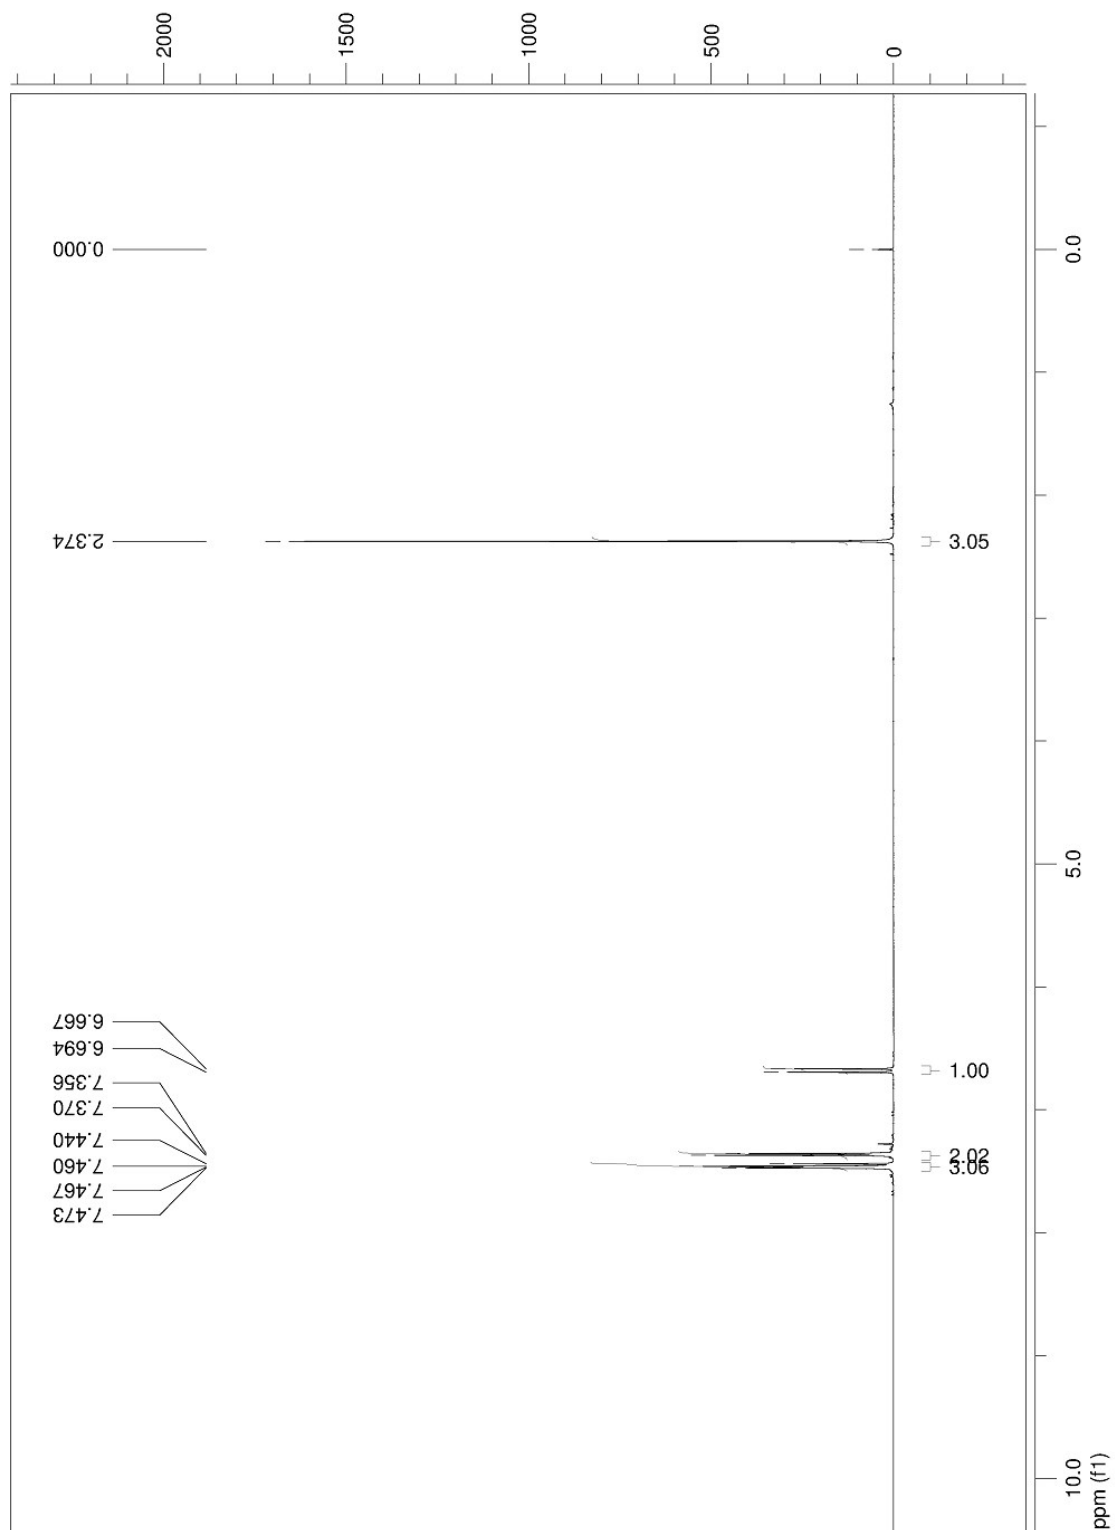

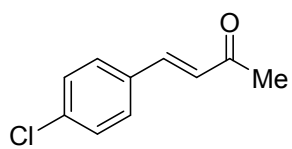

**3f**, CDCl<sub>3</sub>, 150 MHz

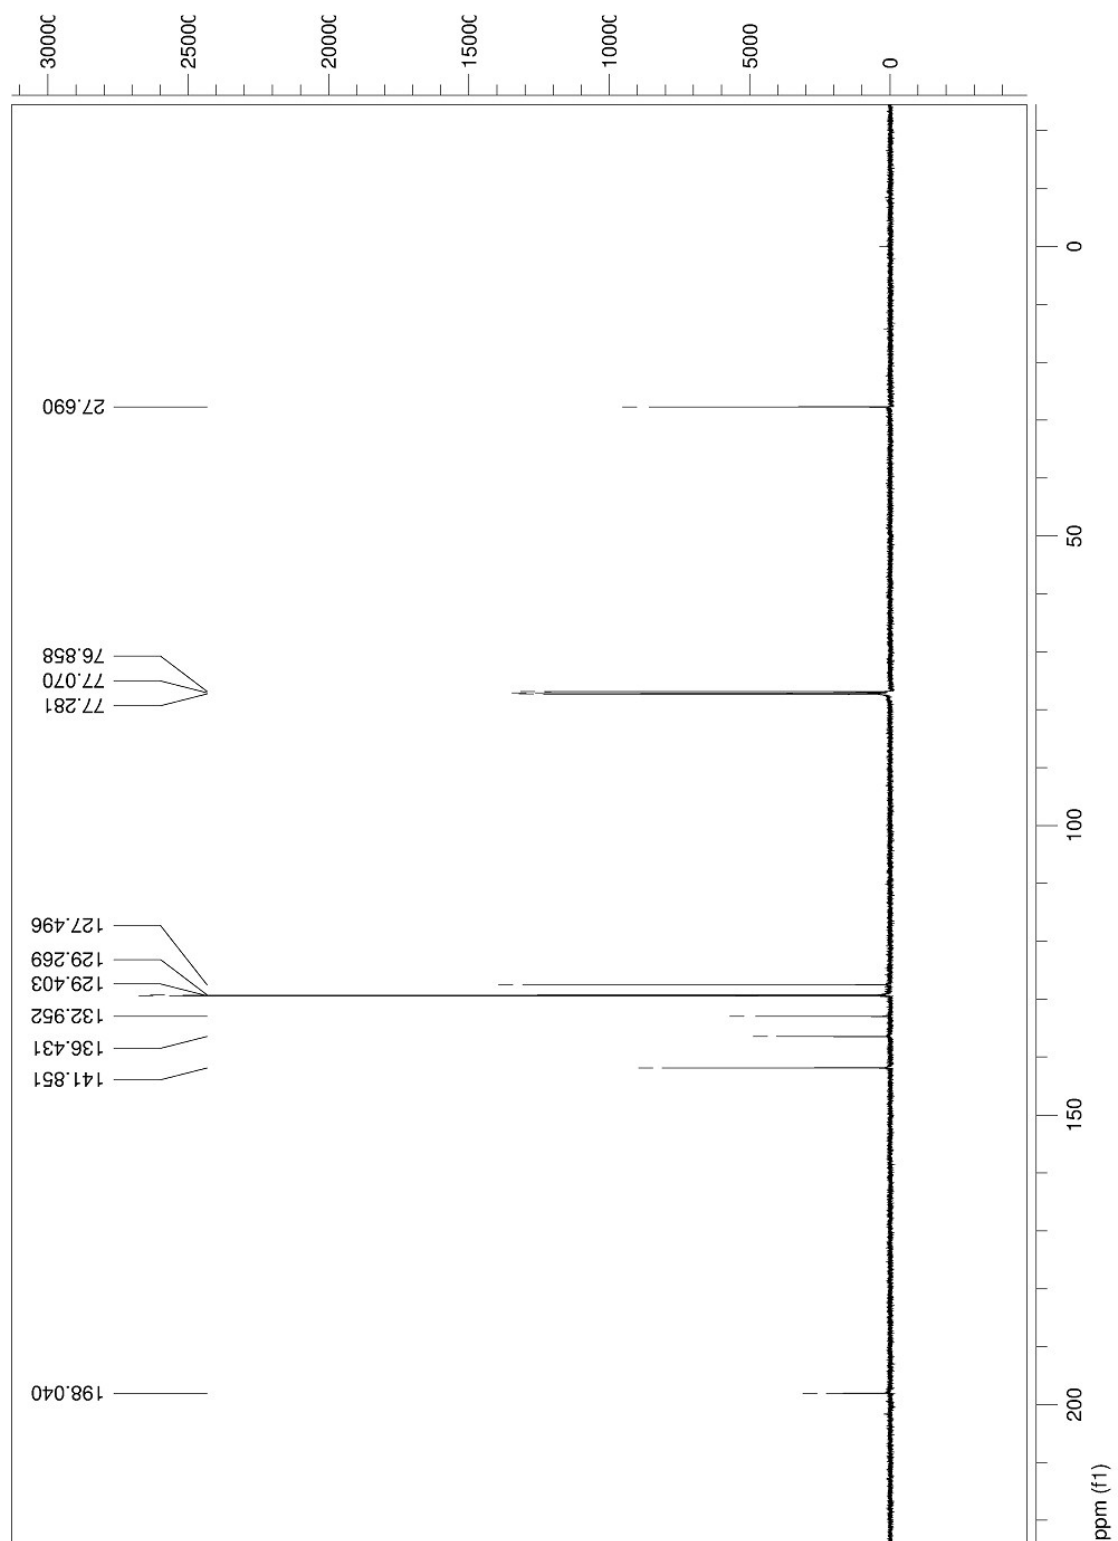

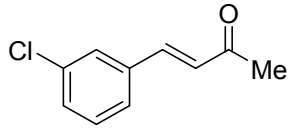

**3g**, CDCl<sub>3</sub>, 400 MHz

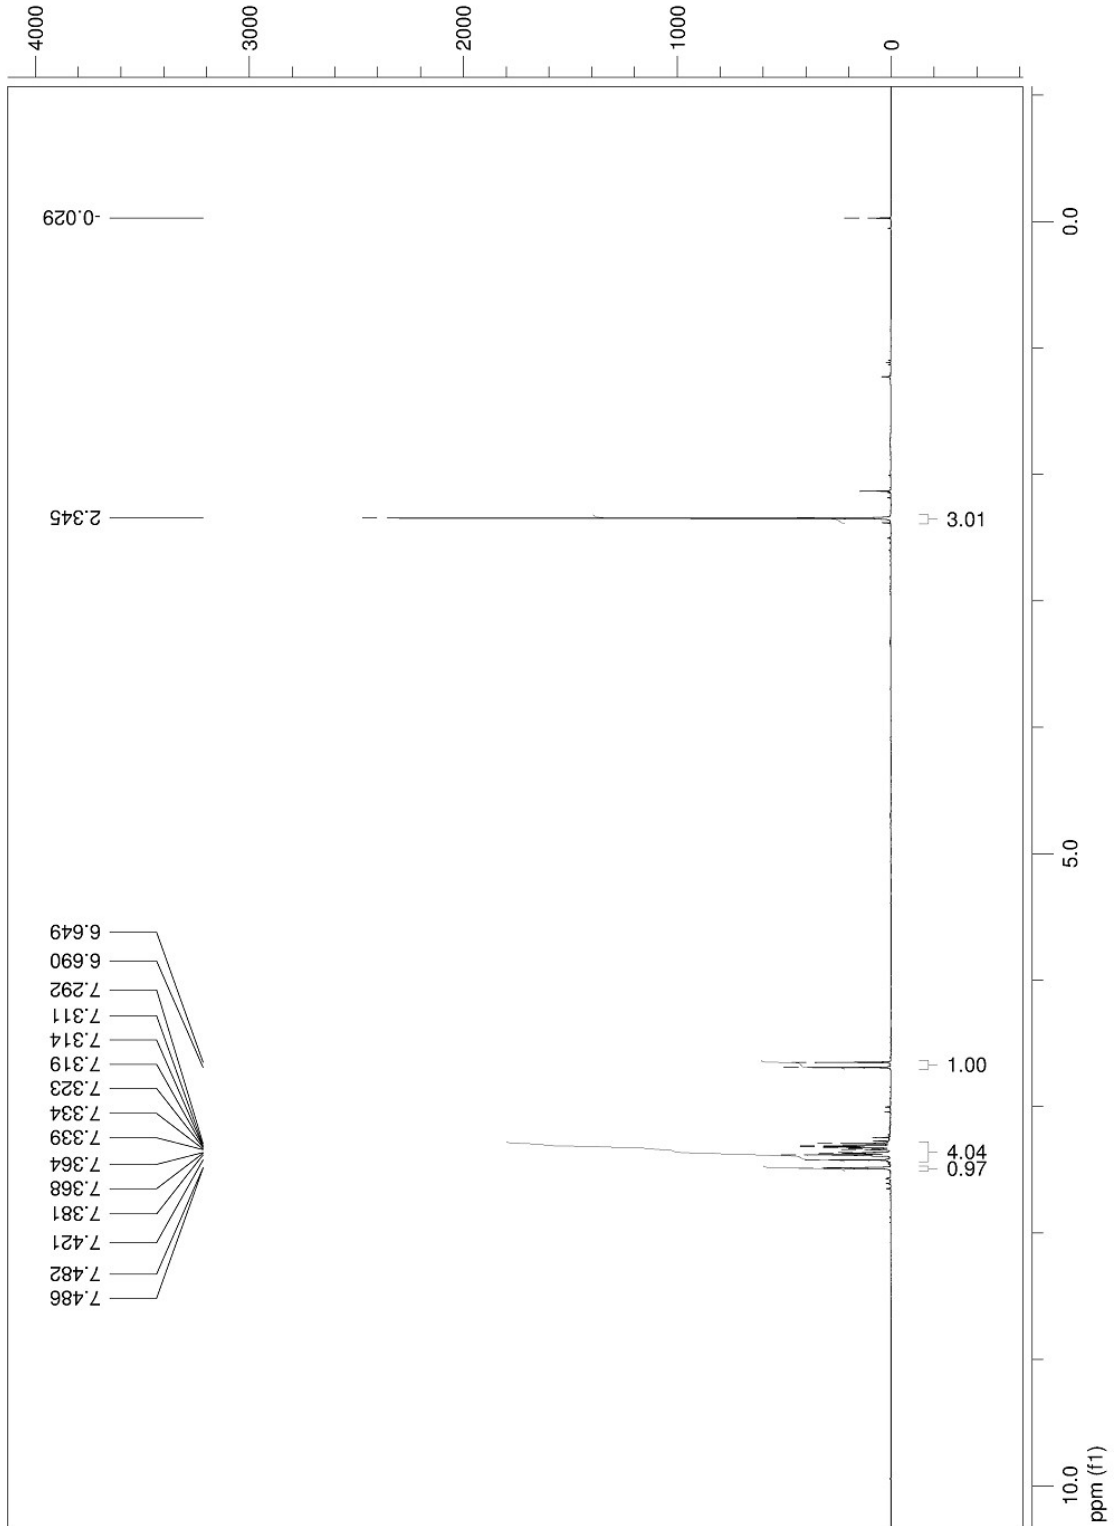

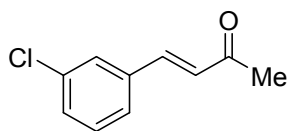

**3g**, CDCl<sub>3</sub>, 100 MHz

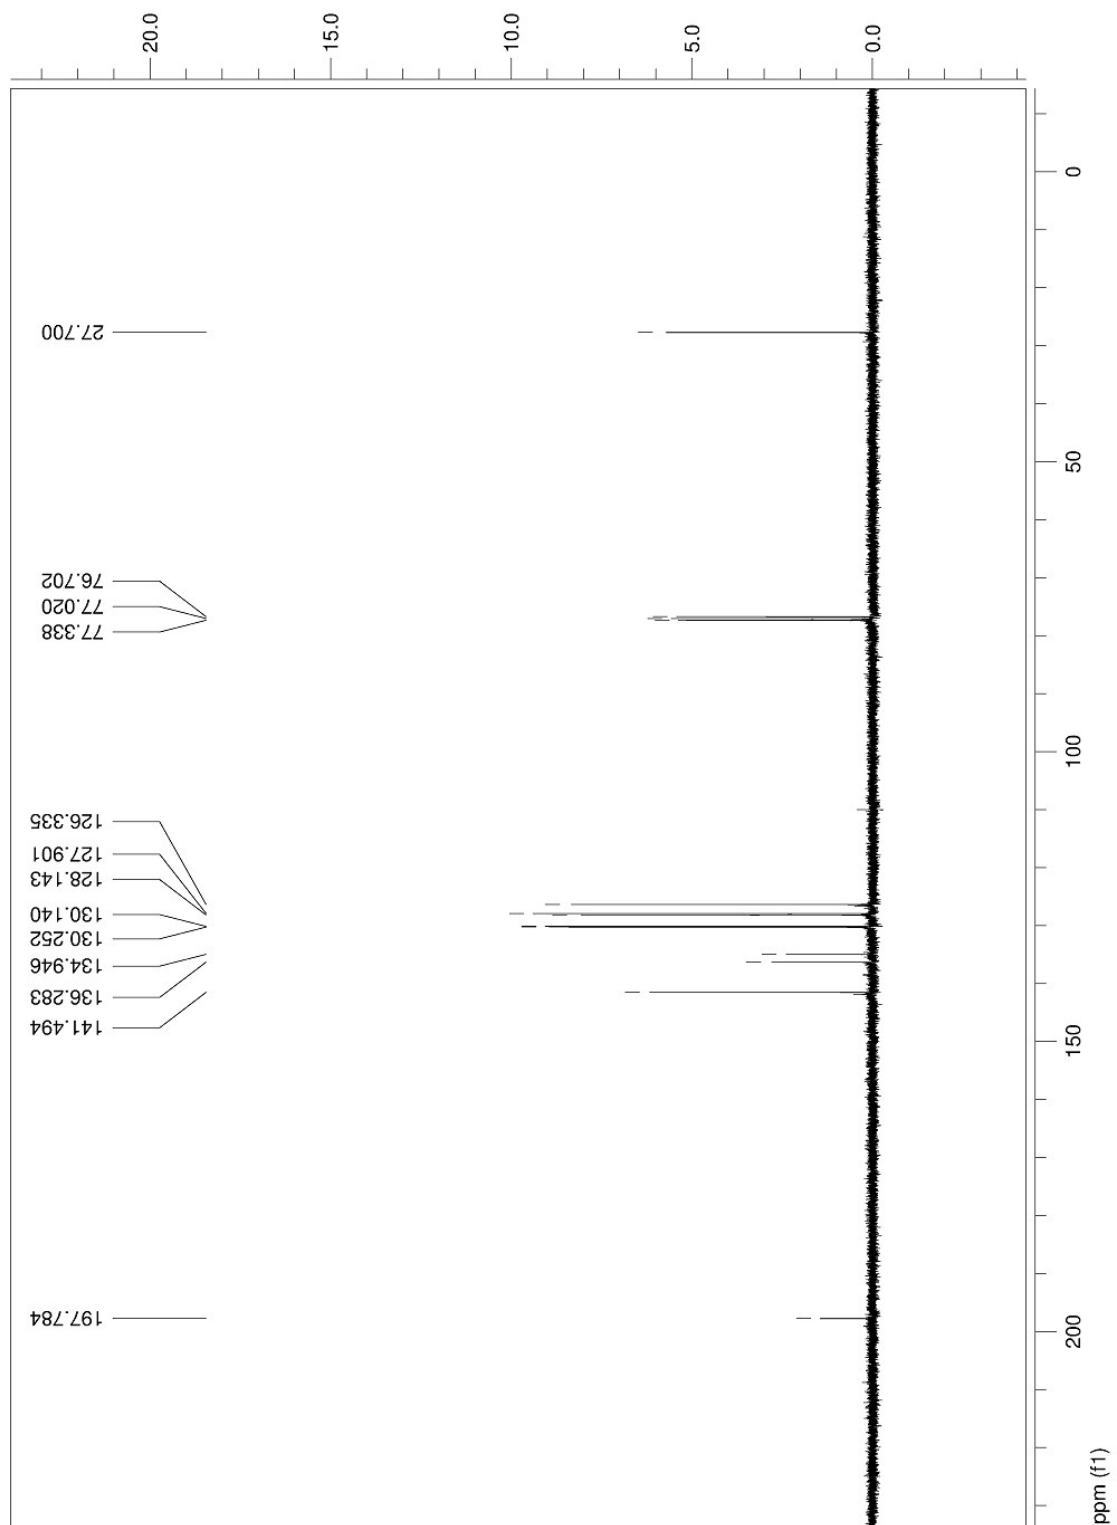



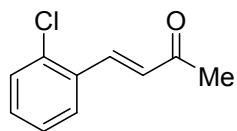

**3h**, CDCl<sub>3</sub>, 400 MHz

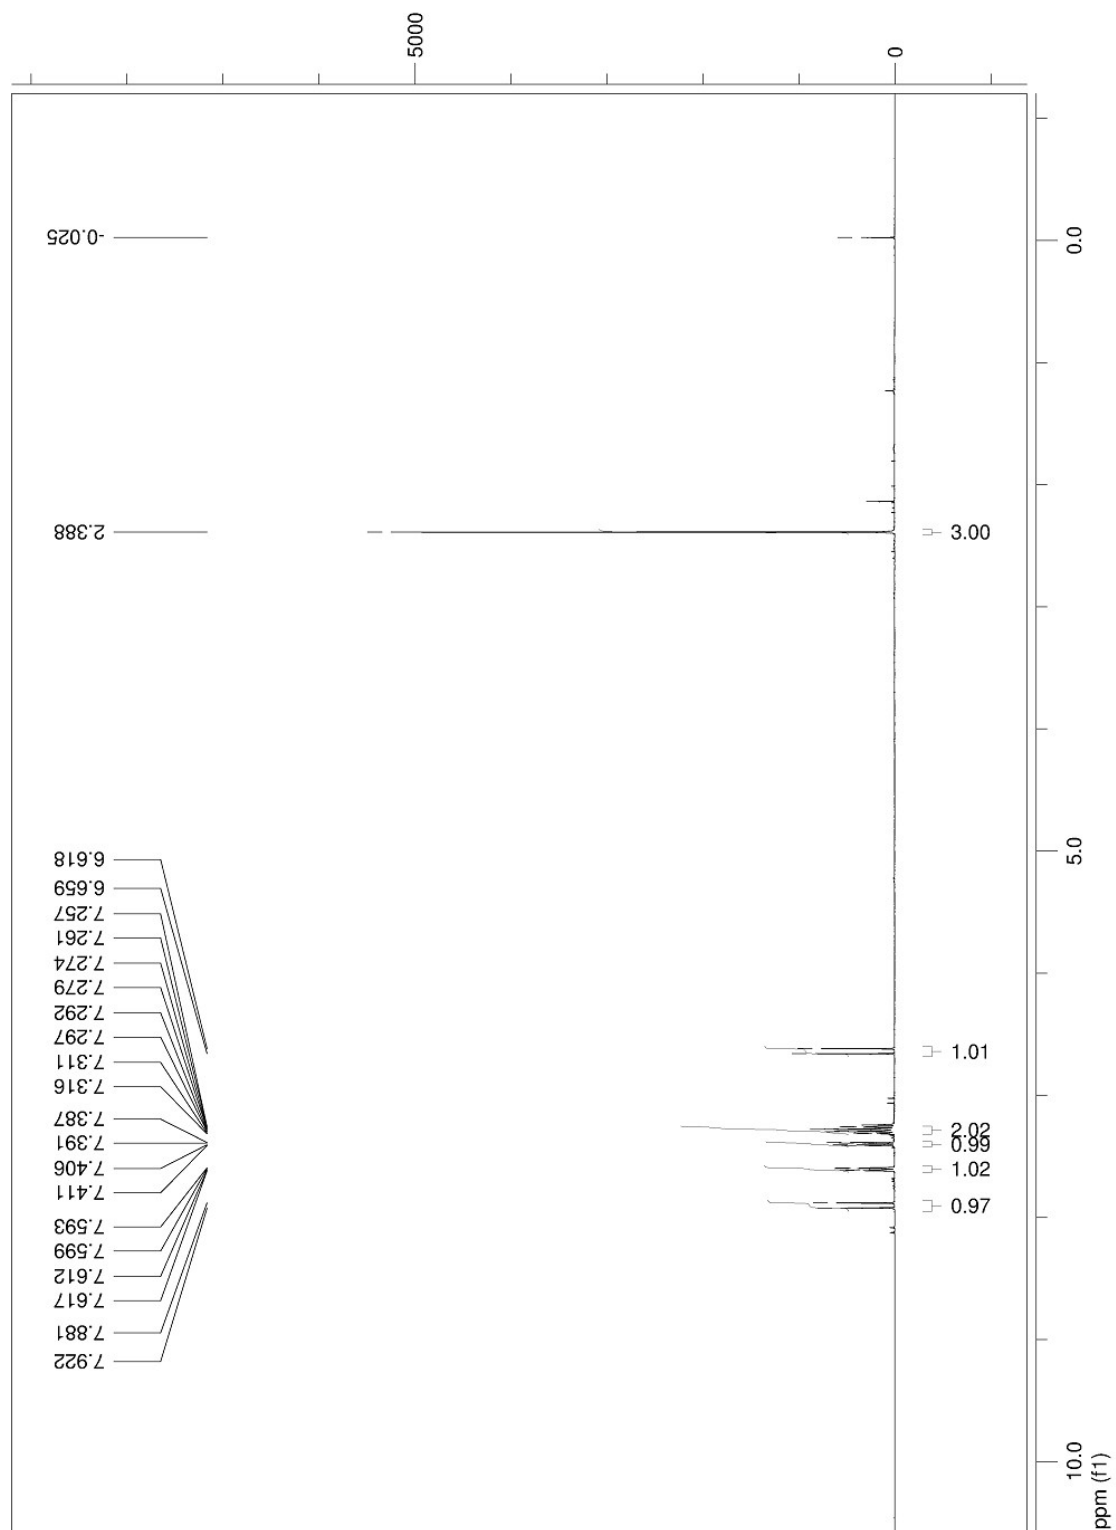



**3h**, CDCl<sub>3</sub>, 100 MHz

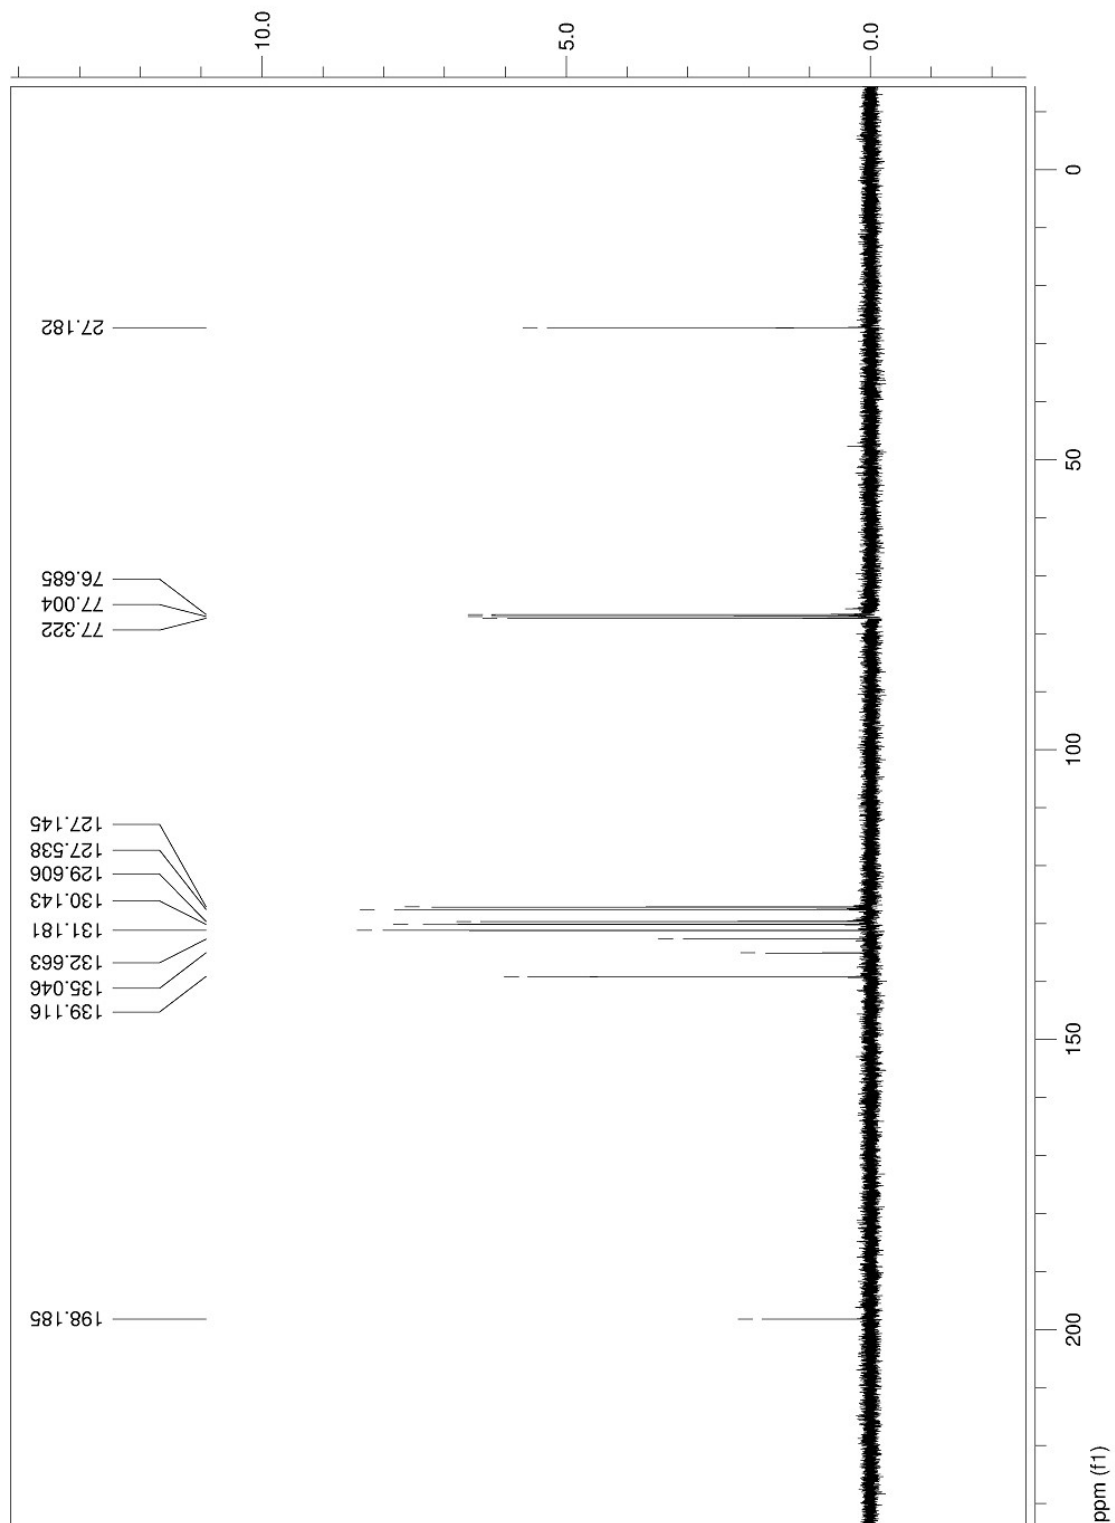

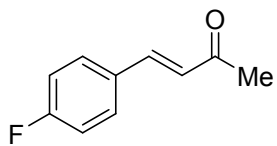

**3i**, CDCl<sub>3</sub>, 400 MHz

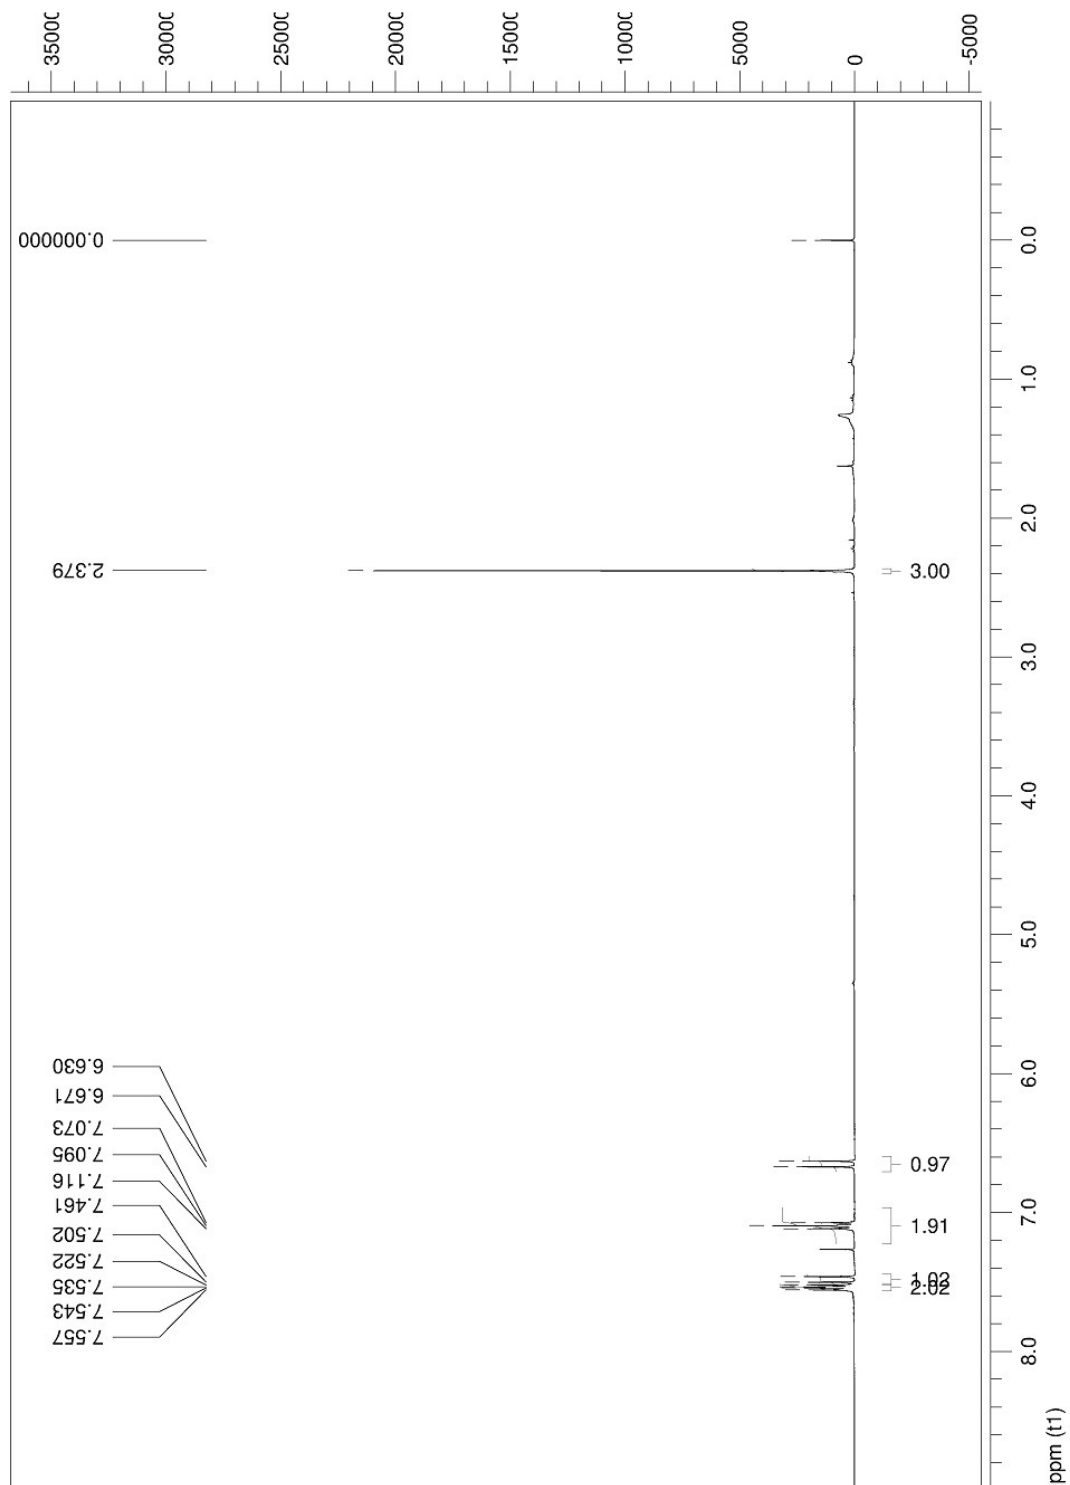



**3i**, CDCl<sub>3</sub>, 100 MHz

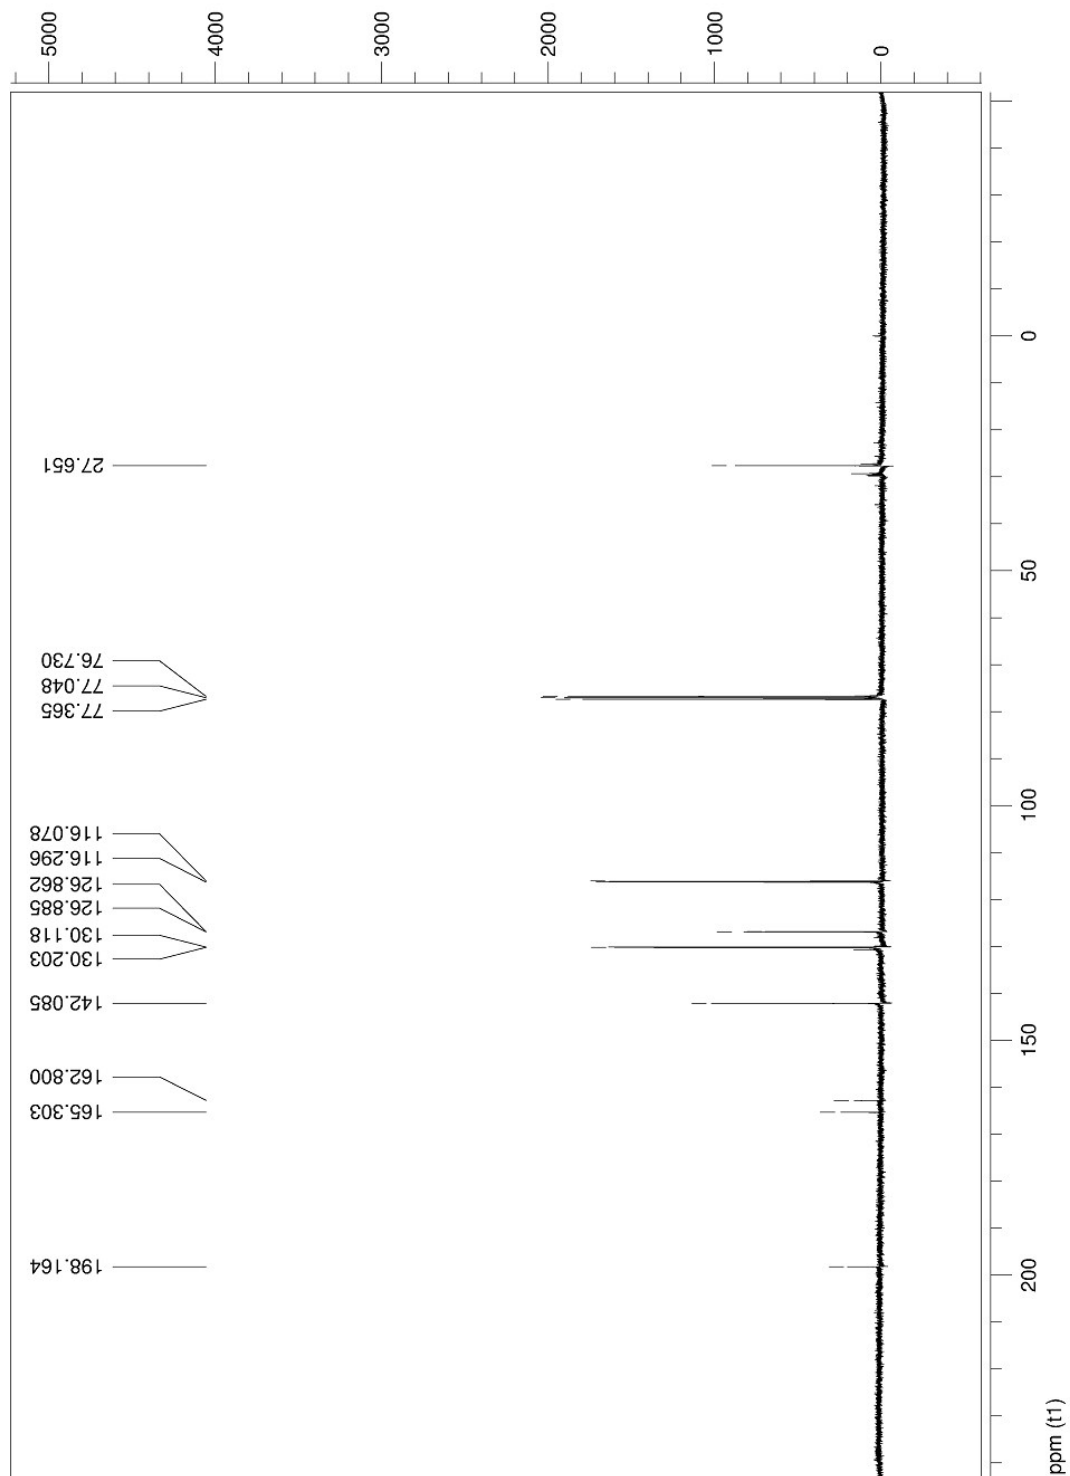

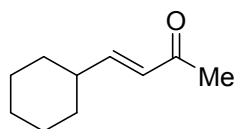

**3j**, CDCl<sub>3</sub>, 400 MHz

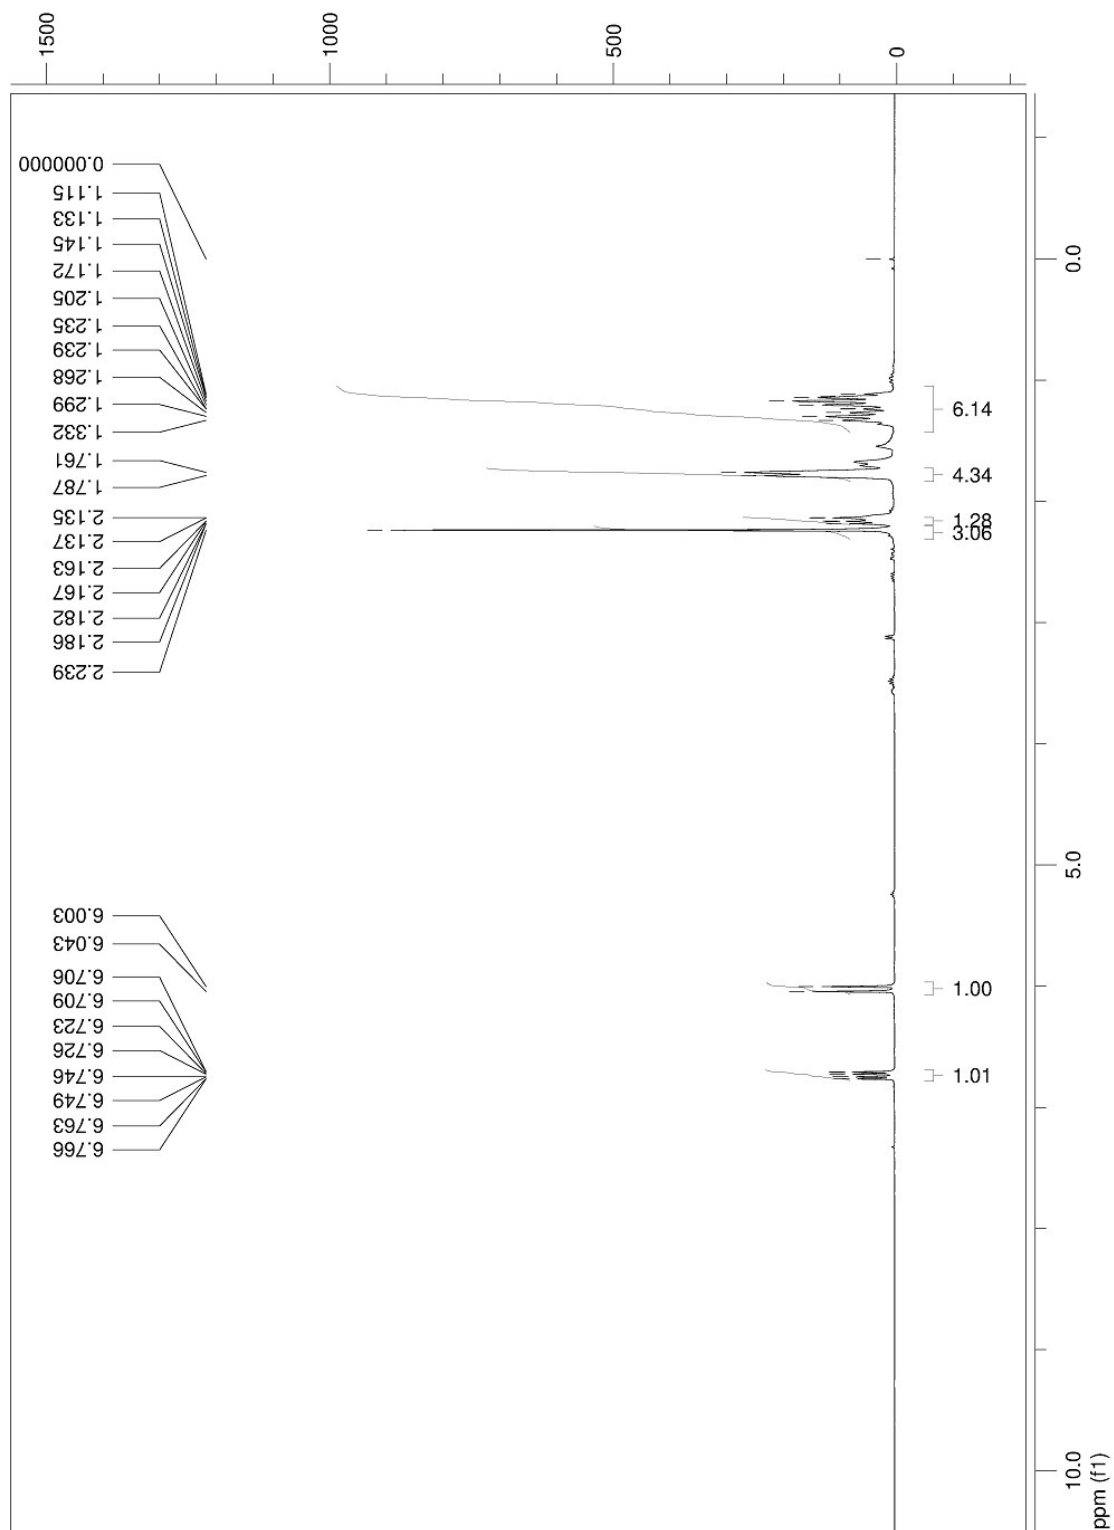



**3j**, CDCl<sub>3</sub>, 100 MHz

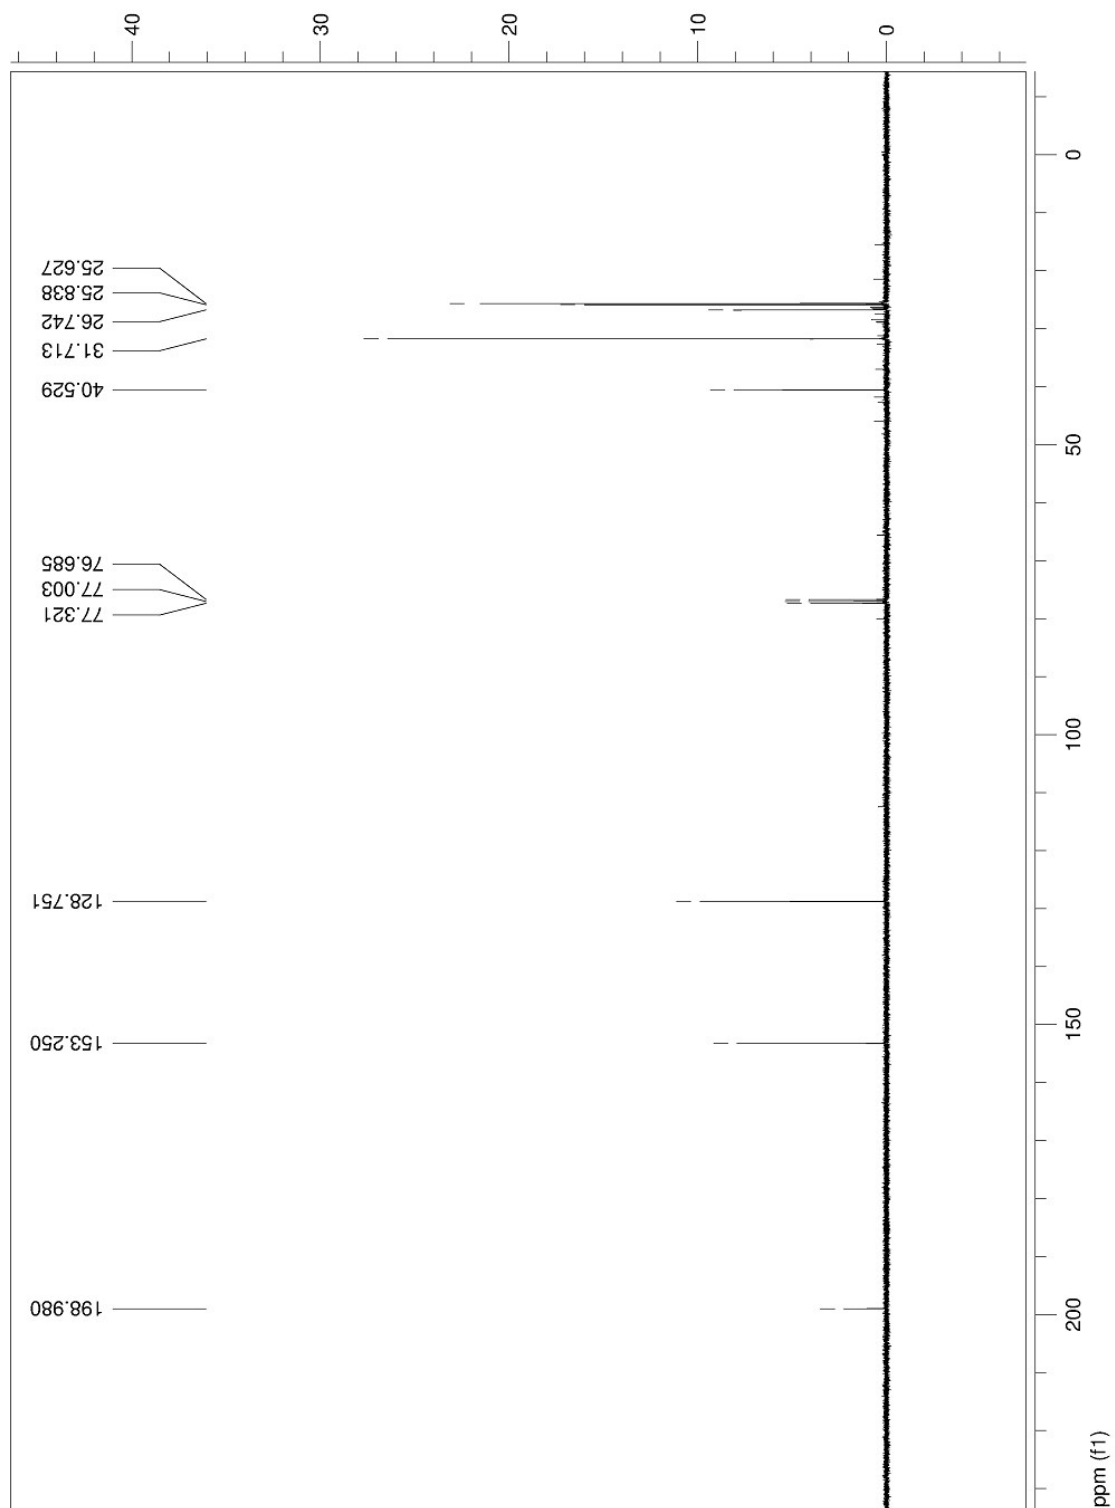

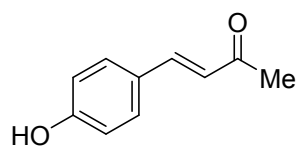

**3k**, CDCl<sub>3</sub>, 600 MHz

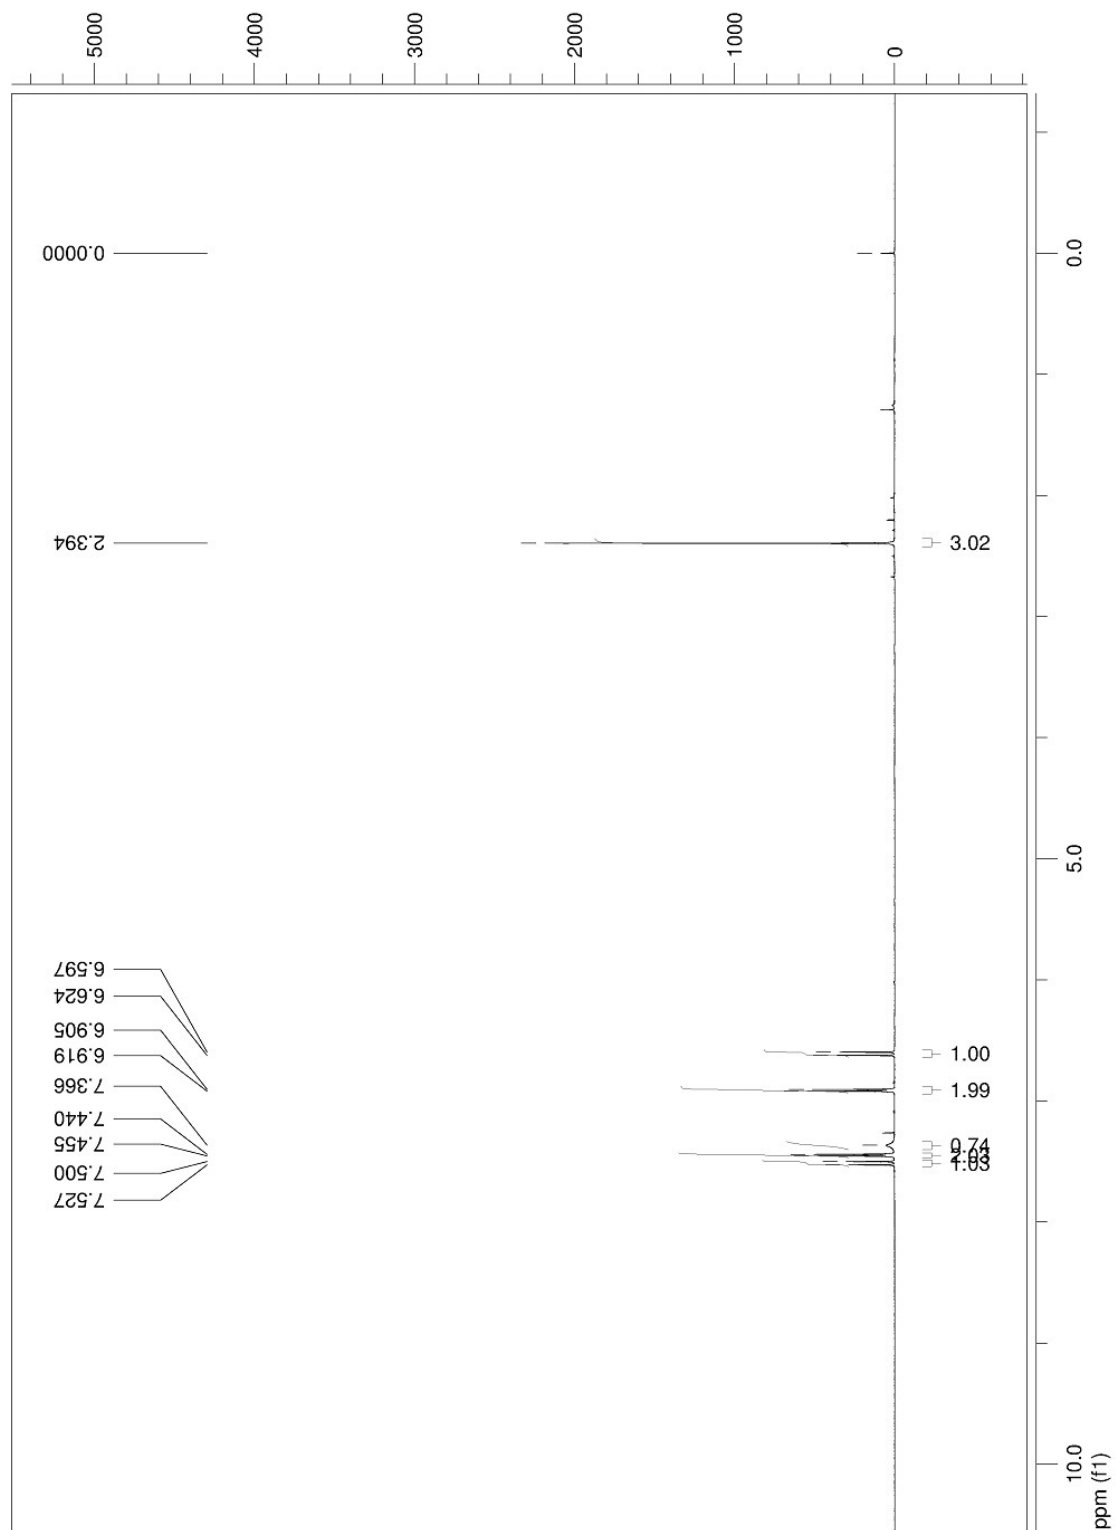



**3k**, CDCl<sub>3</sub>, 150 MHz

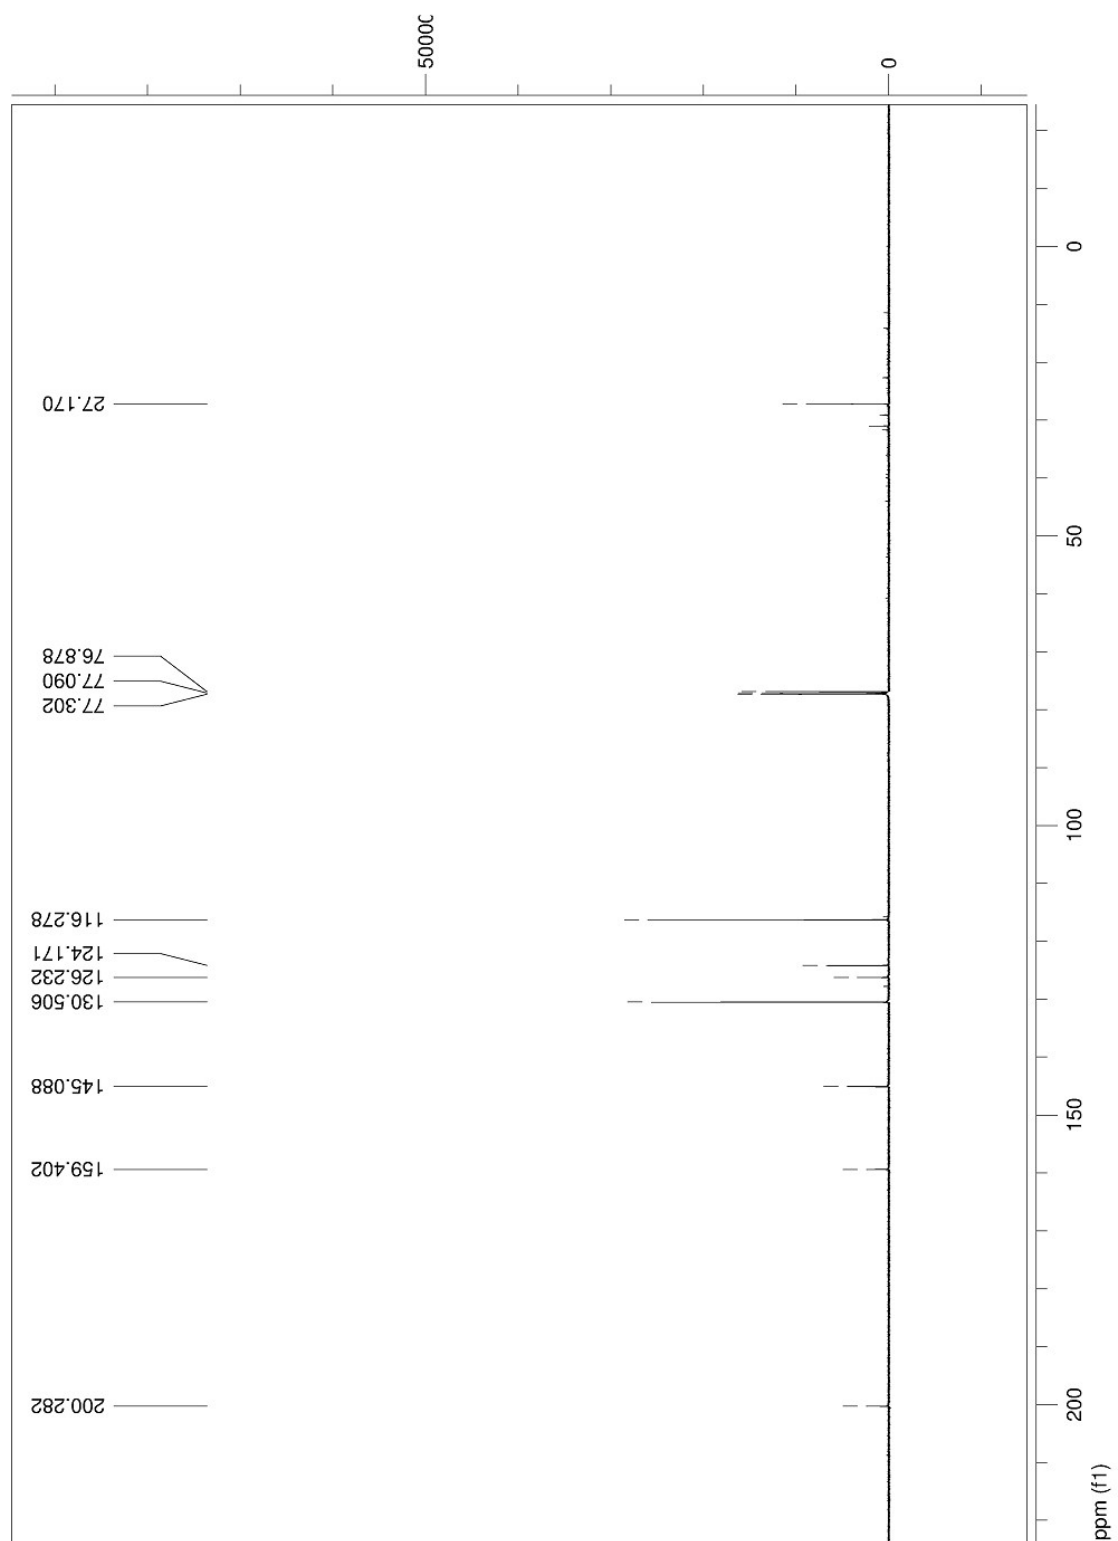



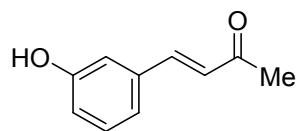

**31**, CDCl<sub>3</sub>, 400 MHz

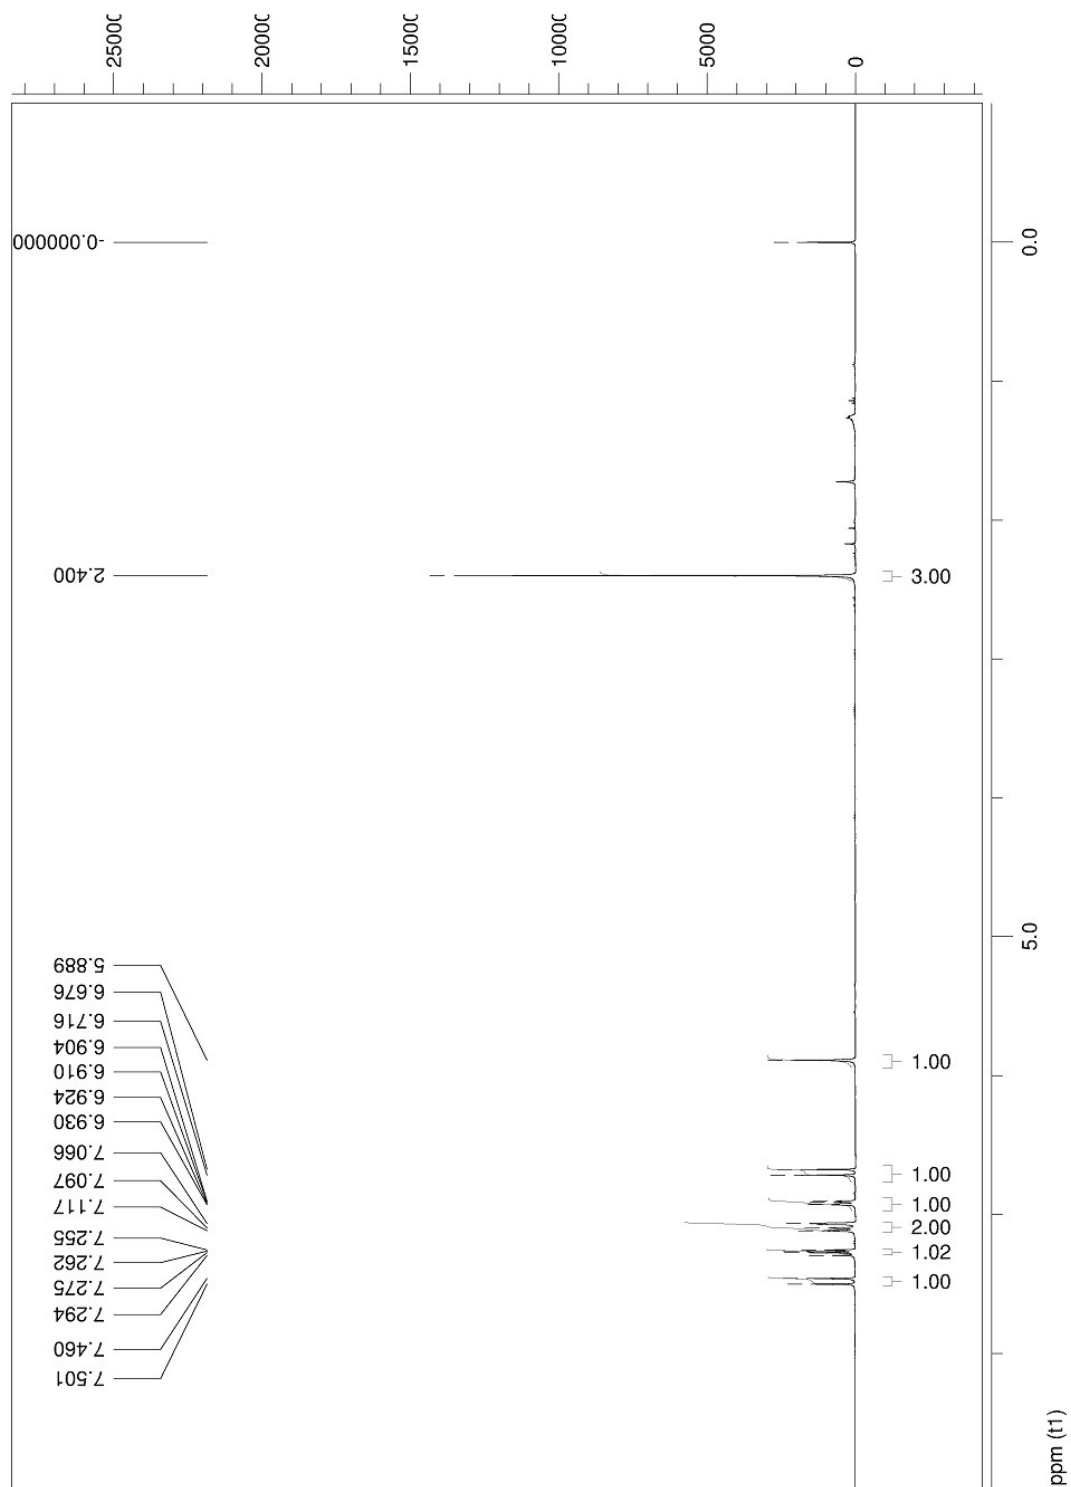

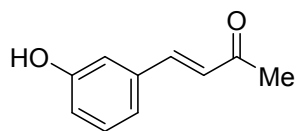

**31**, CDCl<sub>3</sub>, 100 MHz

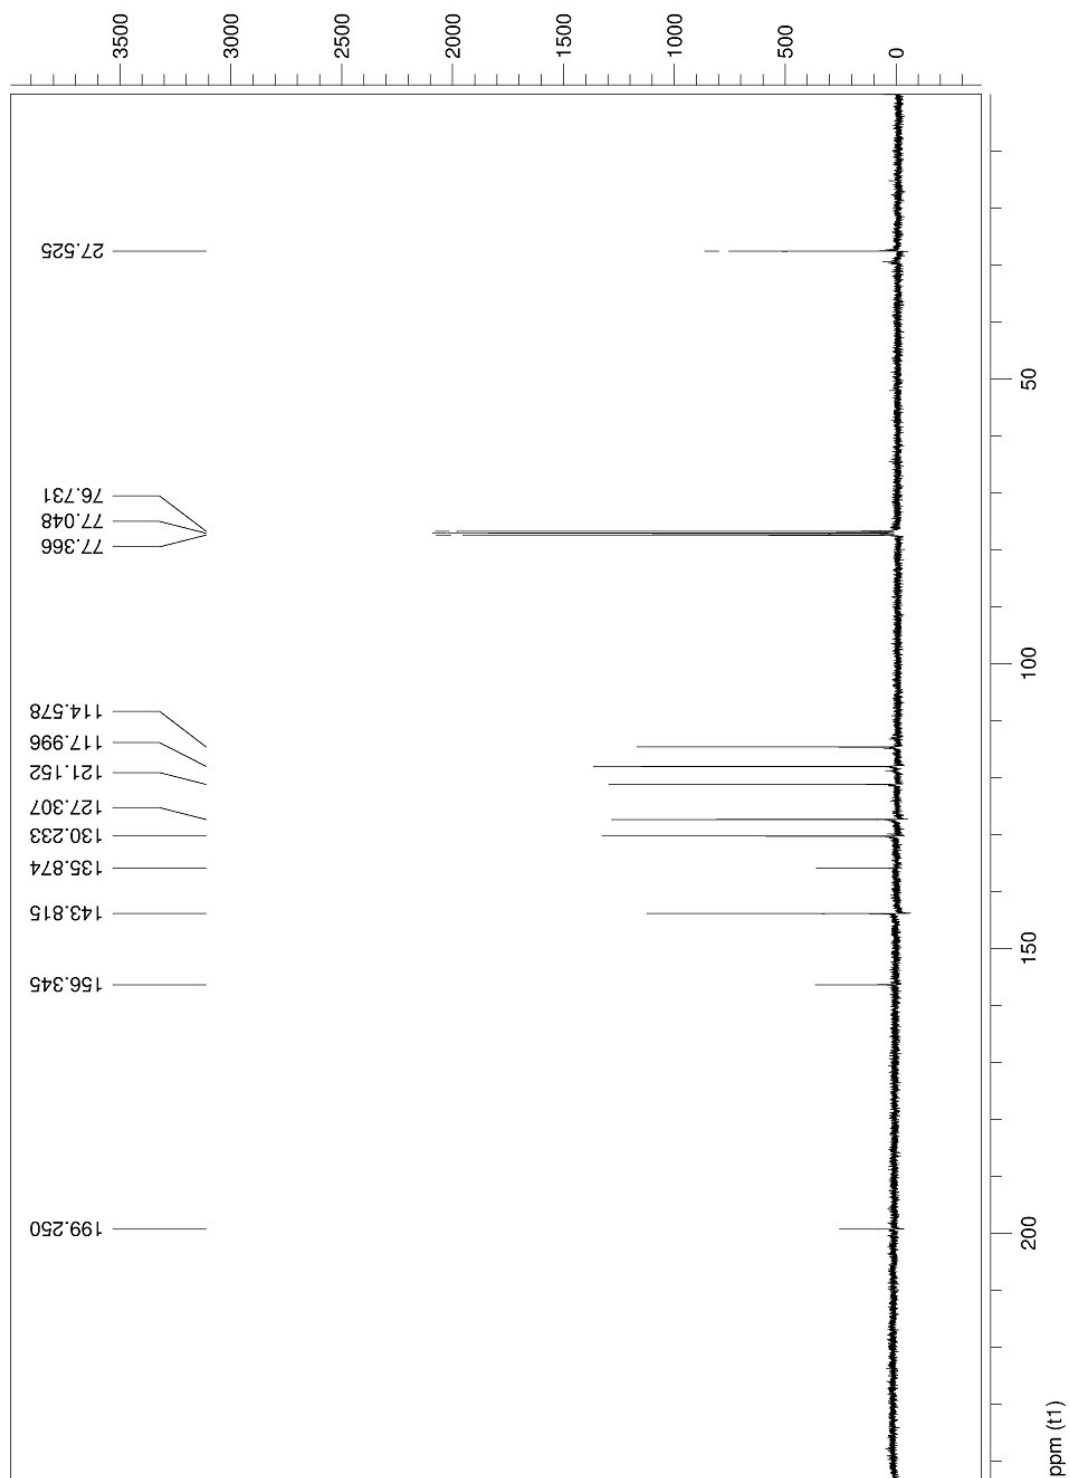

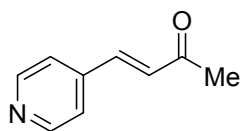

**3m**, CDCl<sub>3</sub>, 400 MHz

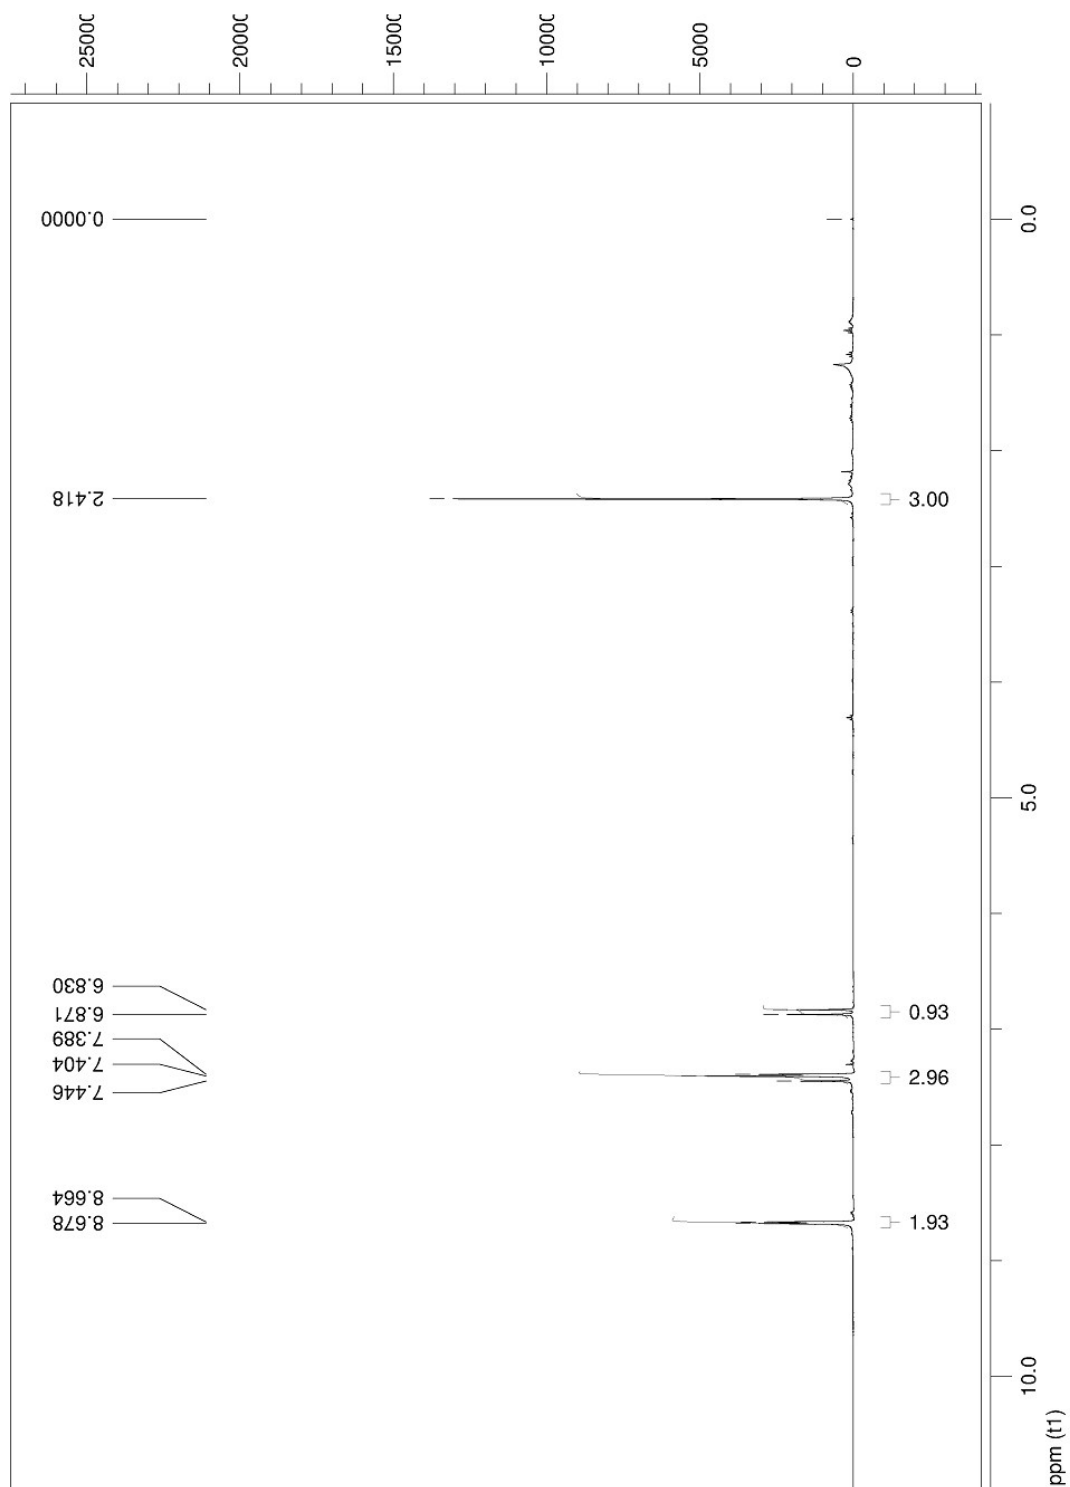



**3m**, CDCl<sub>3</sub>, 100 MHz

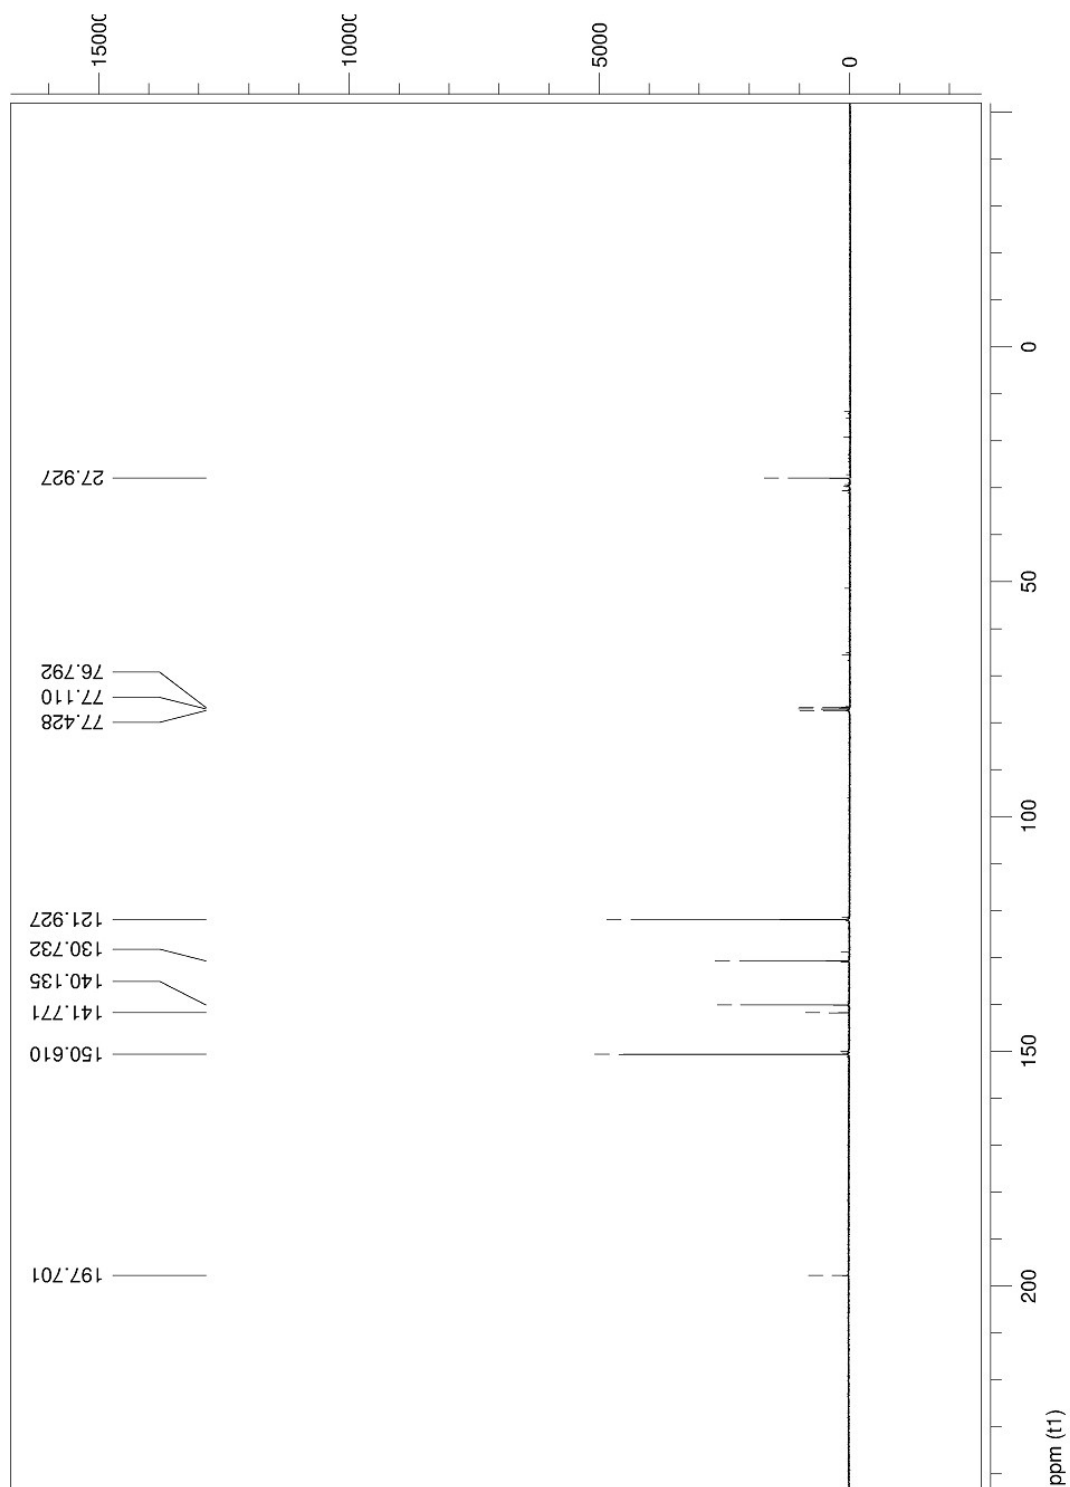

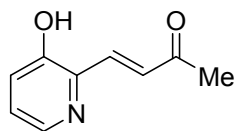

**3n**, DMSO-*d*<sub>6</sub>, 400 MHz

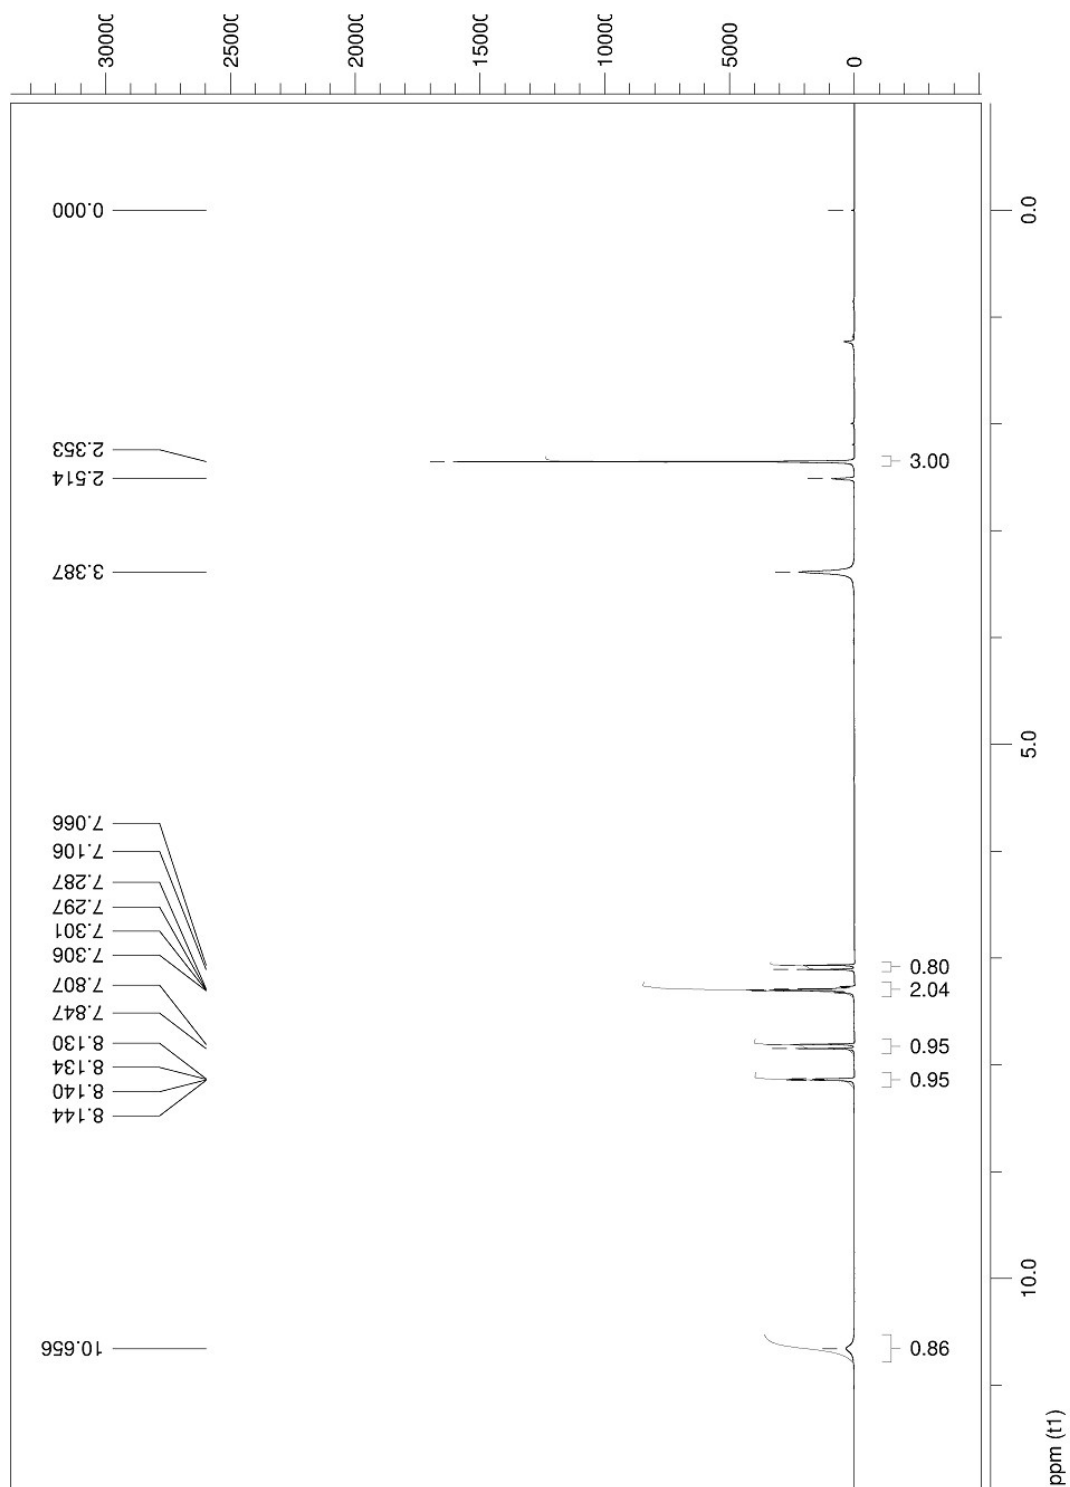



**3n**, DMSO-*d*<sub>6</sub>, 100 MHz

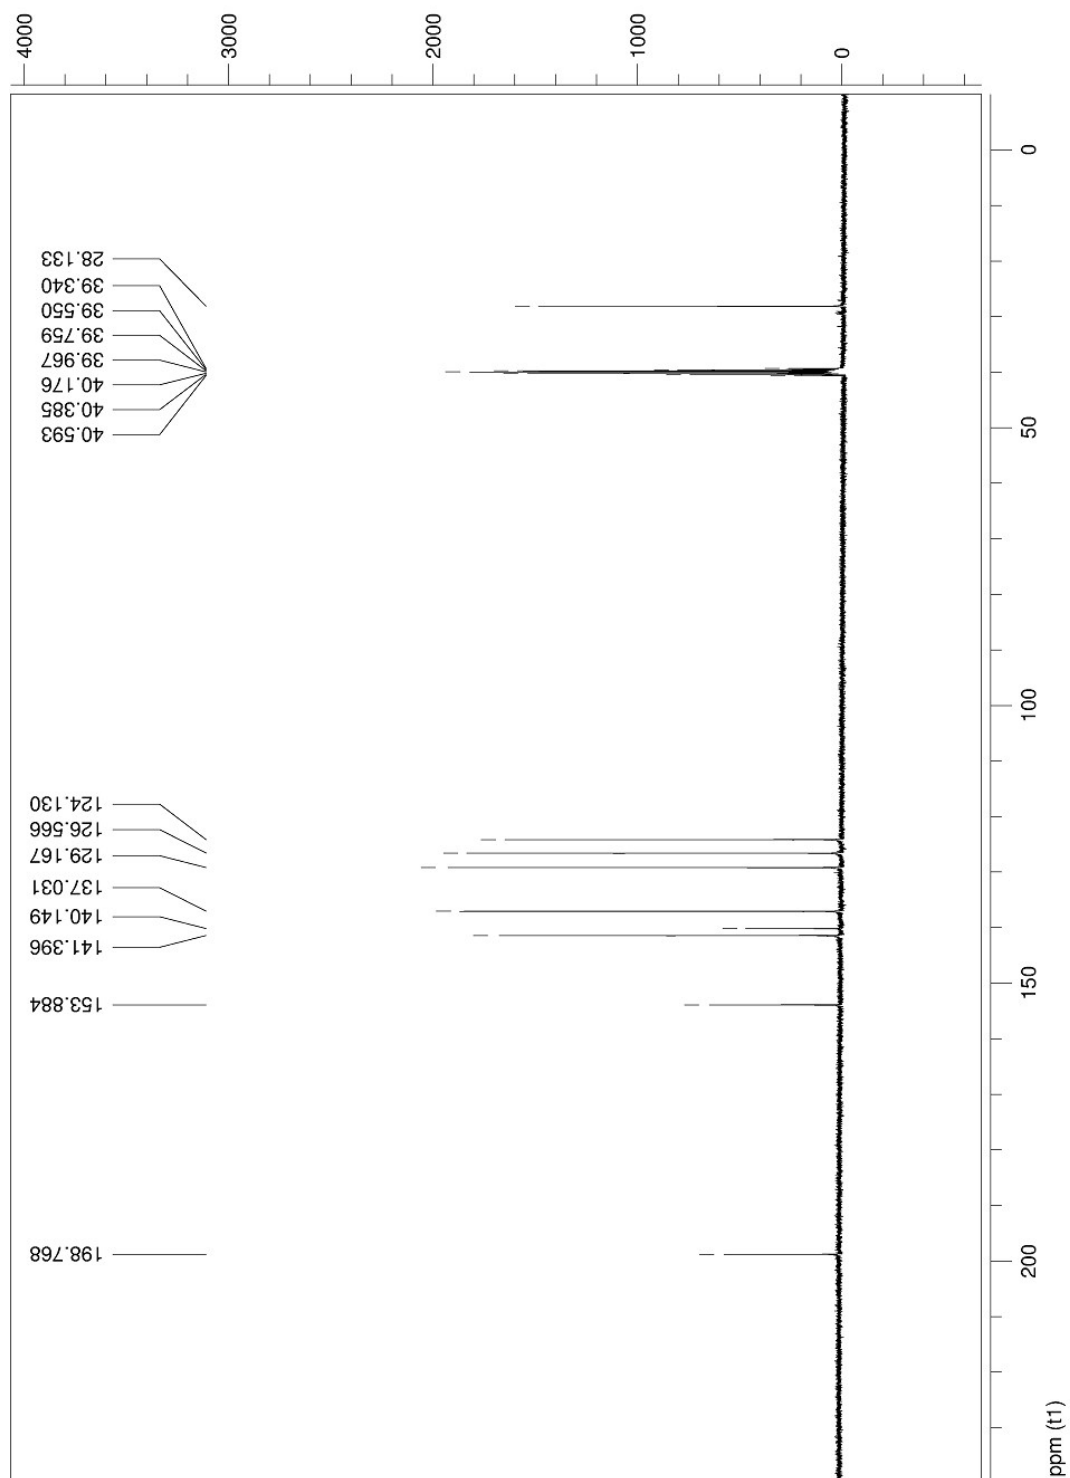

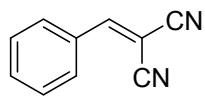

**10a**, CDCl<sub>3</sub>, 400 MHz

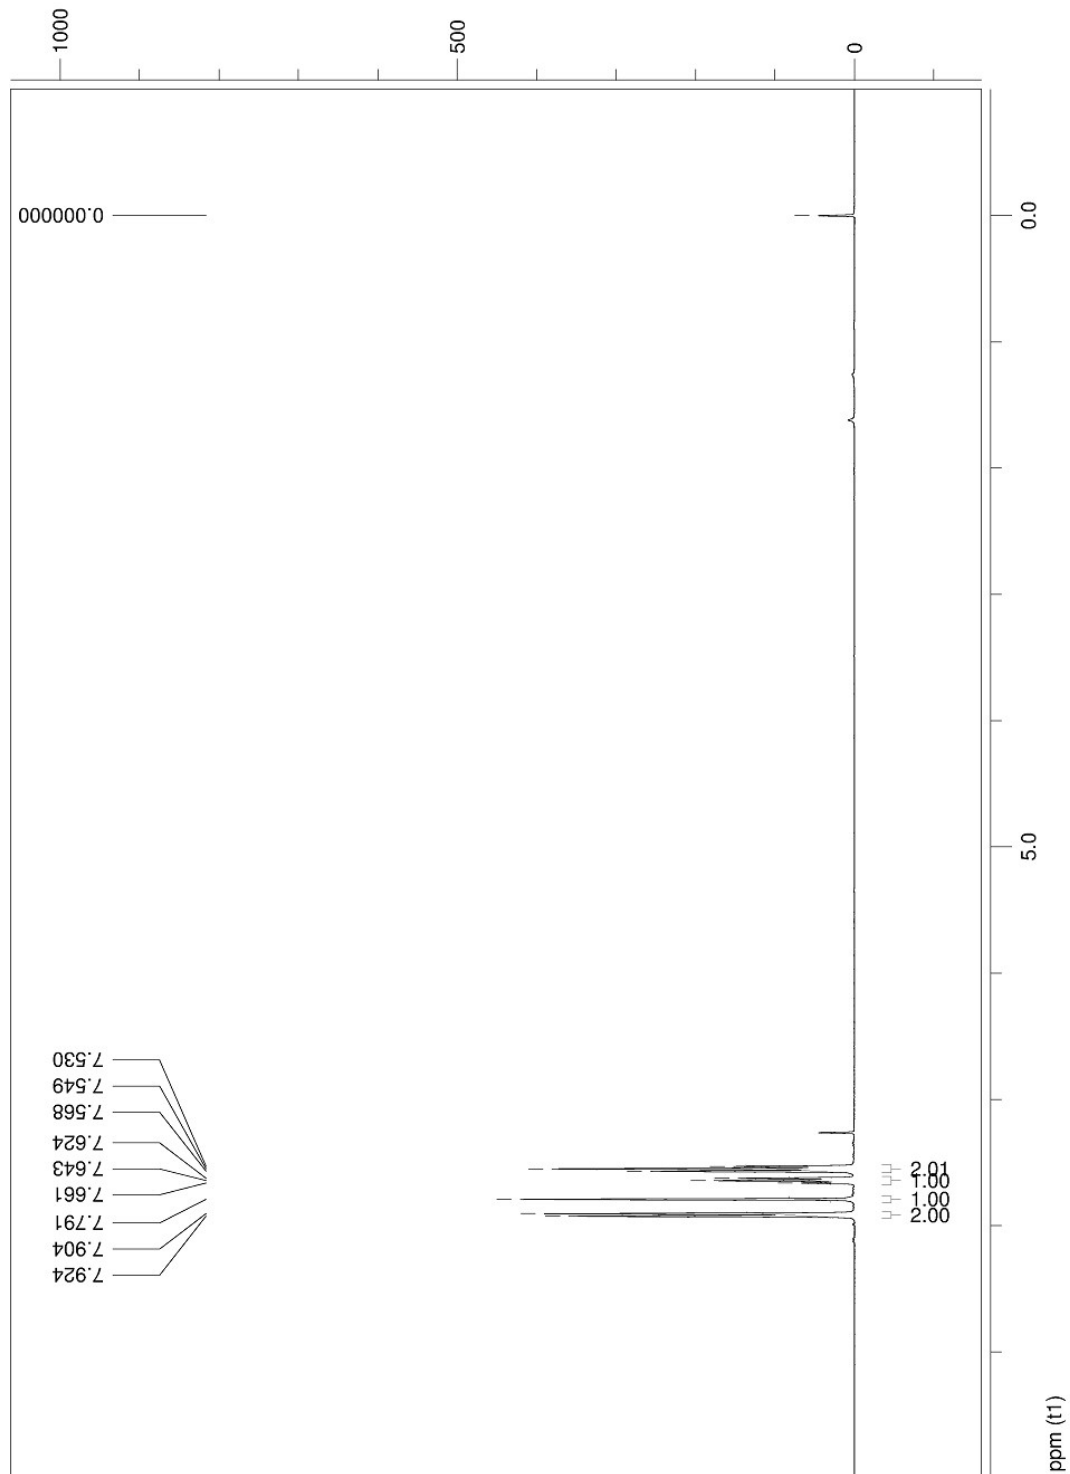



**10a**, CDCl<sub>3</sub>, 100 MHz

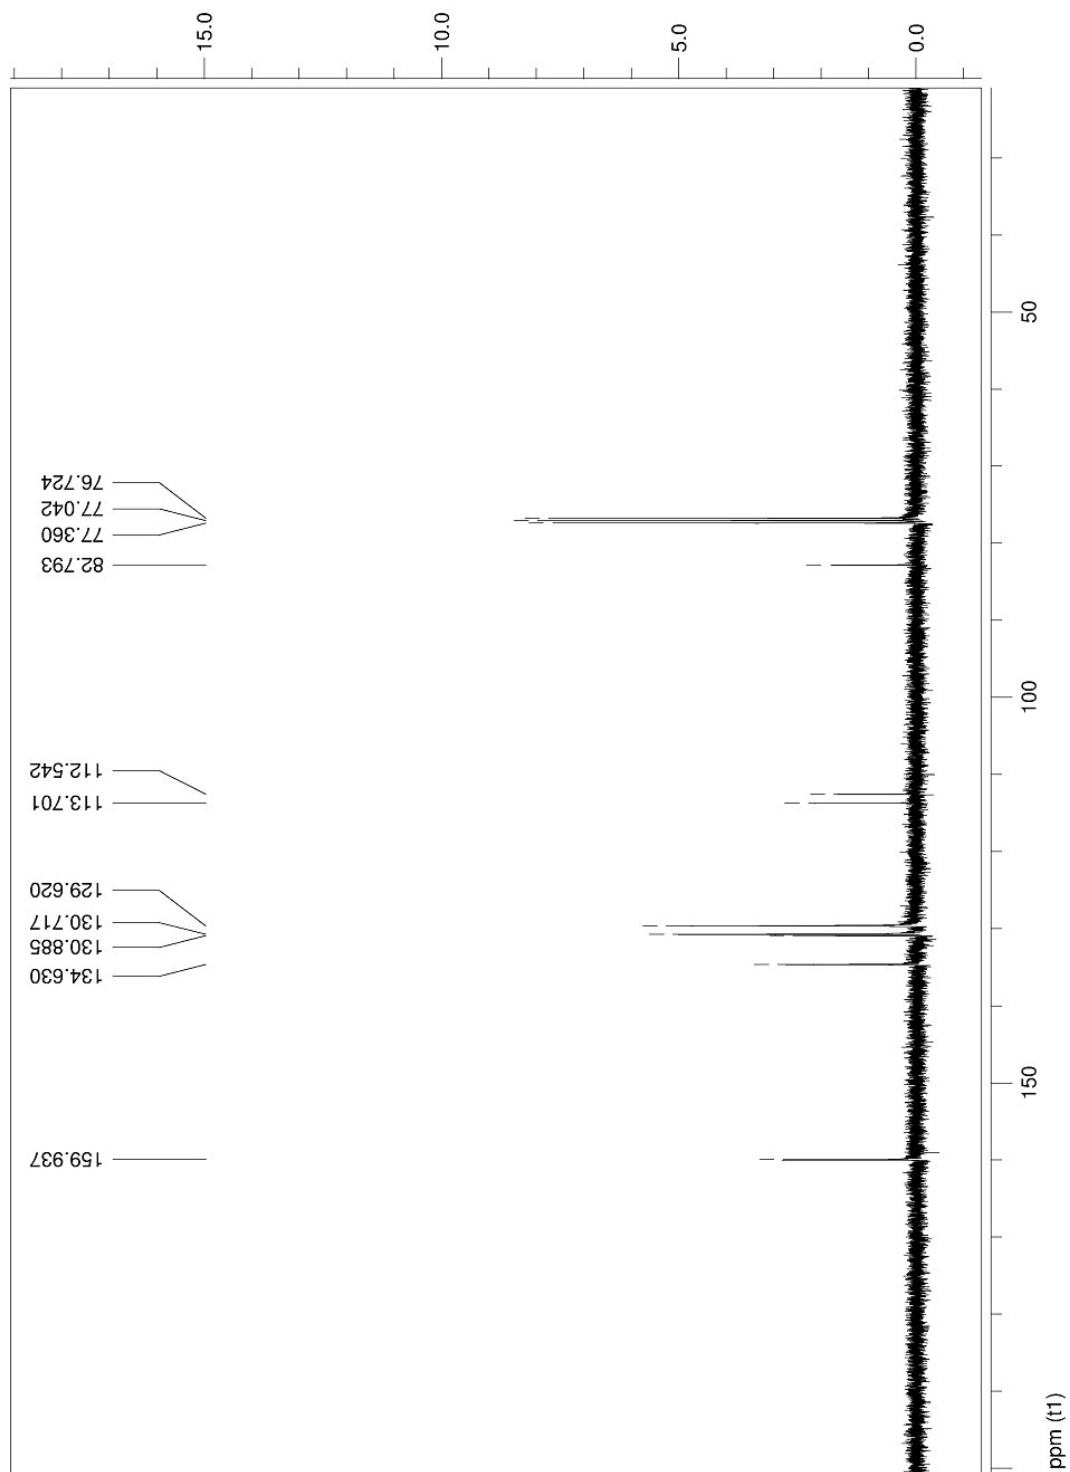



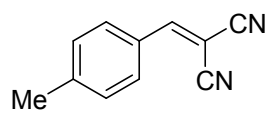

**10b**, CDCl<sub>3</sub>, 400 MHz

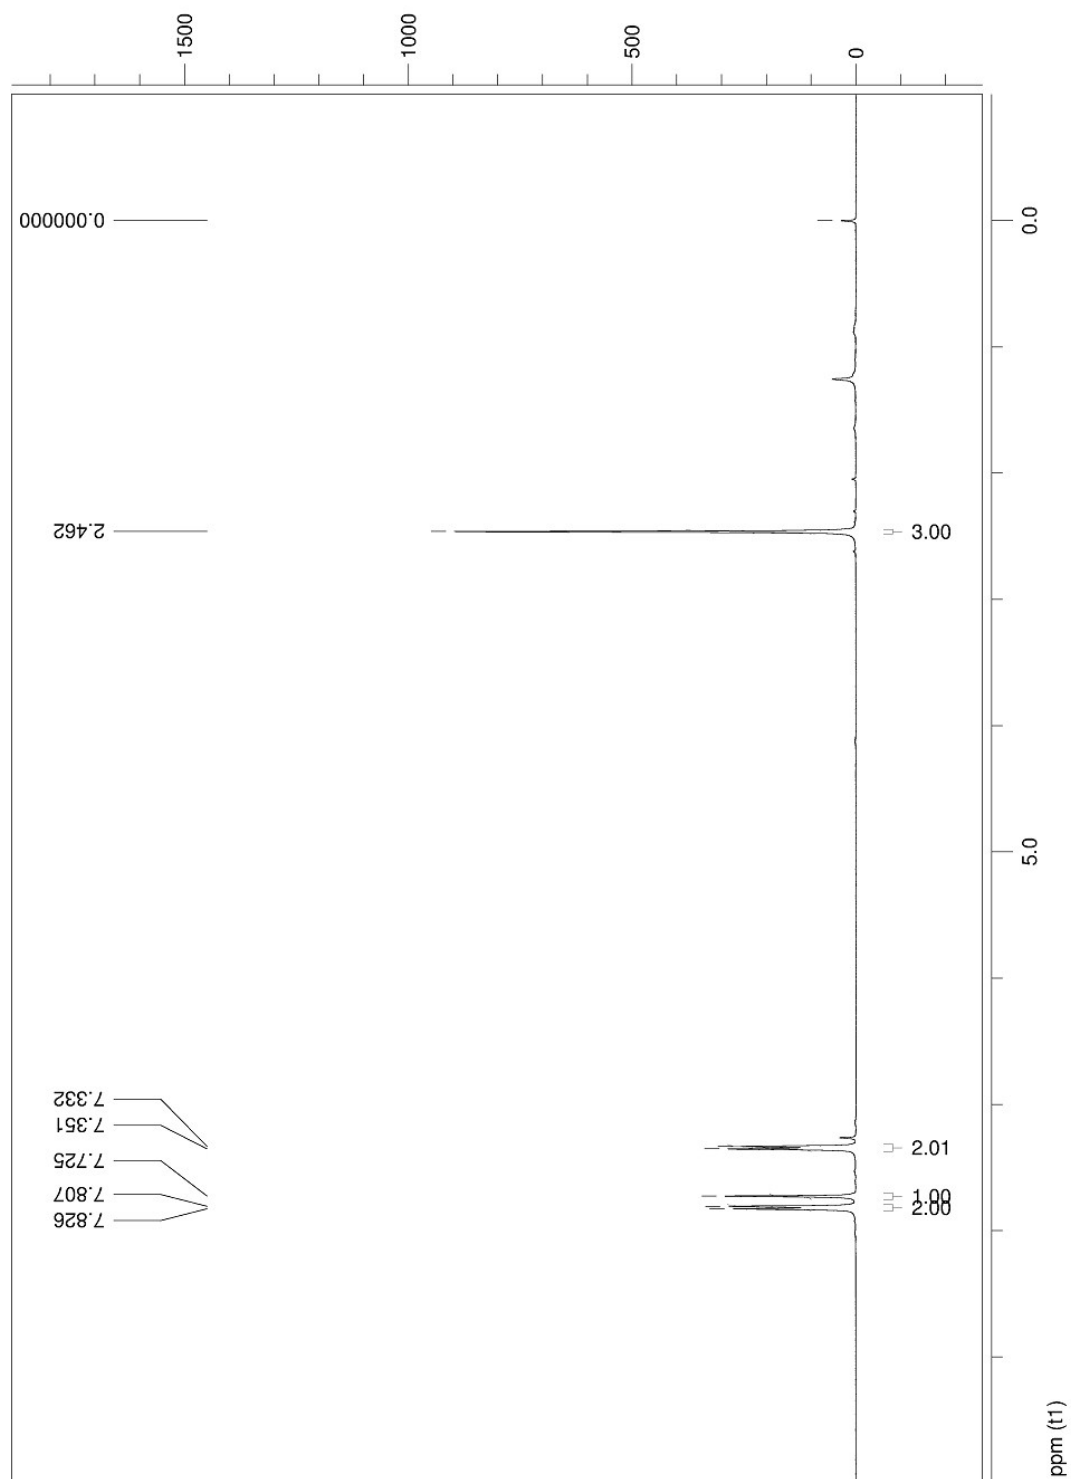



**10b**, CDCl<sub>3</sub>, 100 MHz

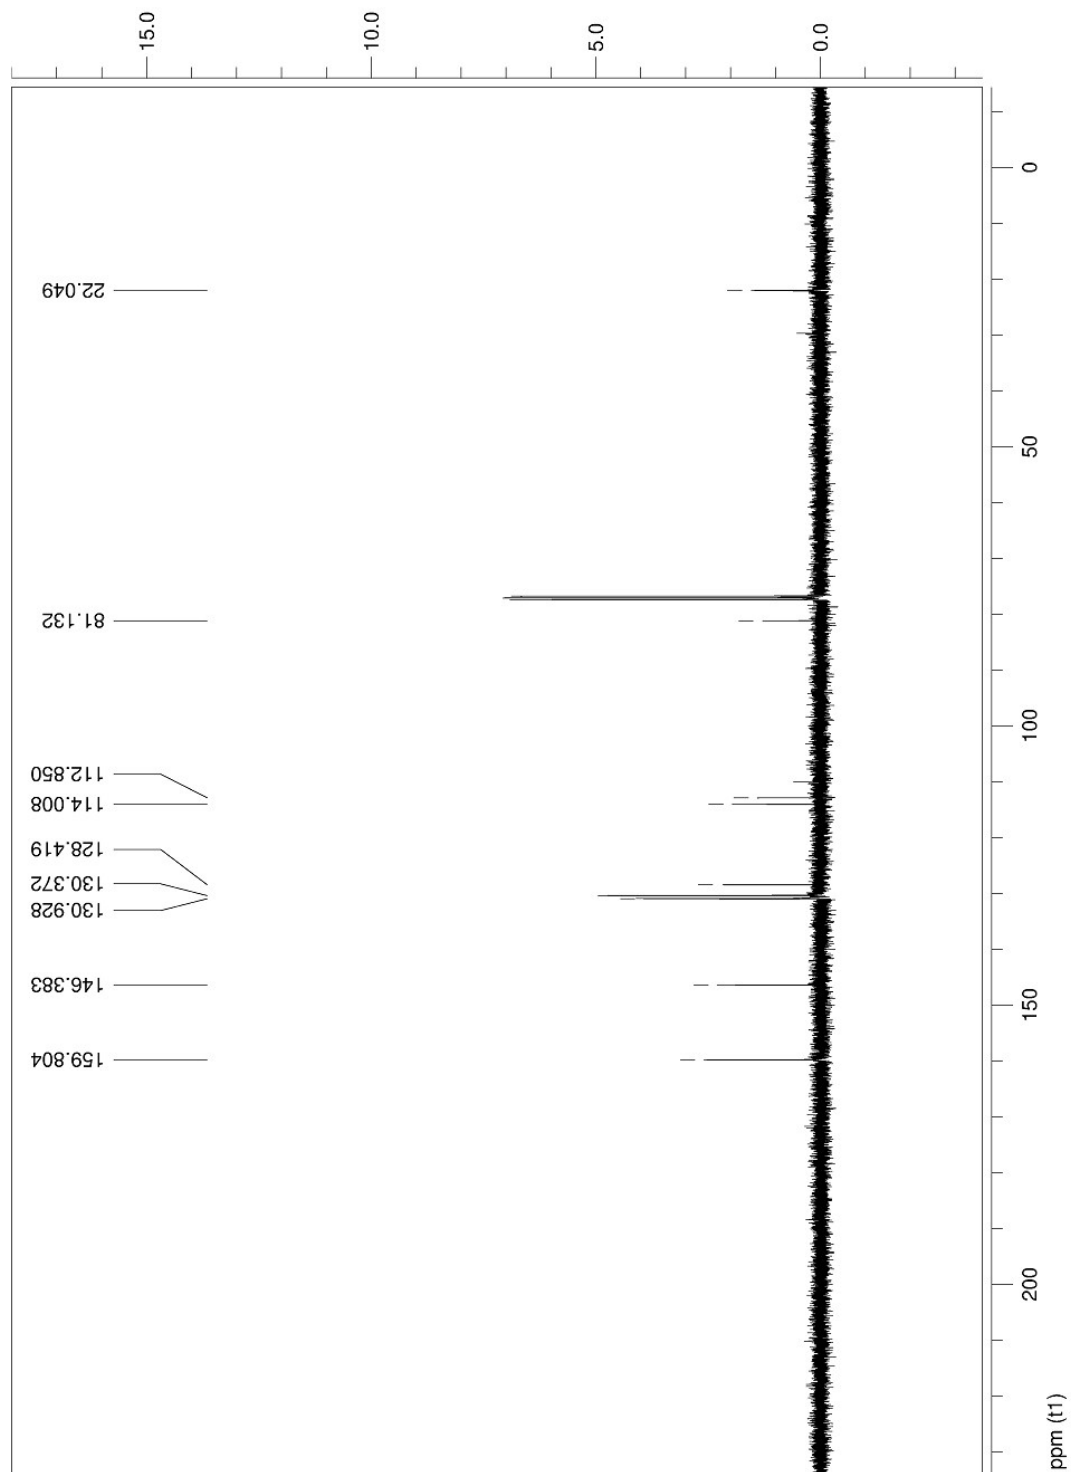

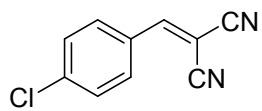

**10c**, CDCl<sub>3</sub>, 400 MHz

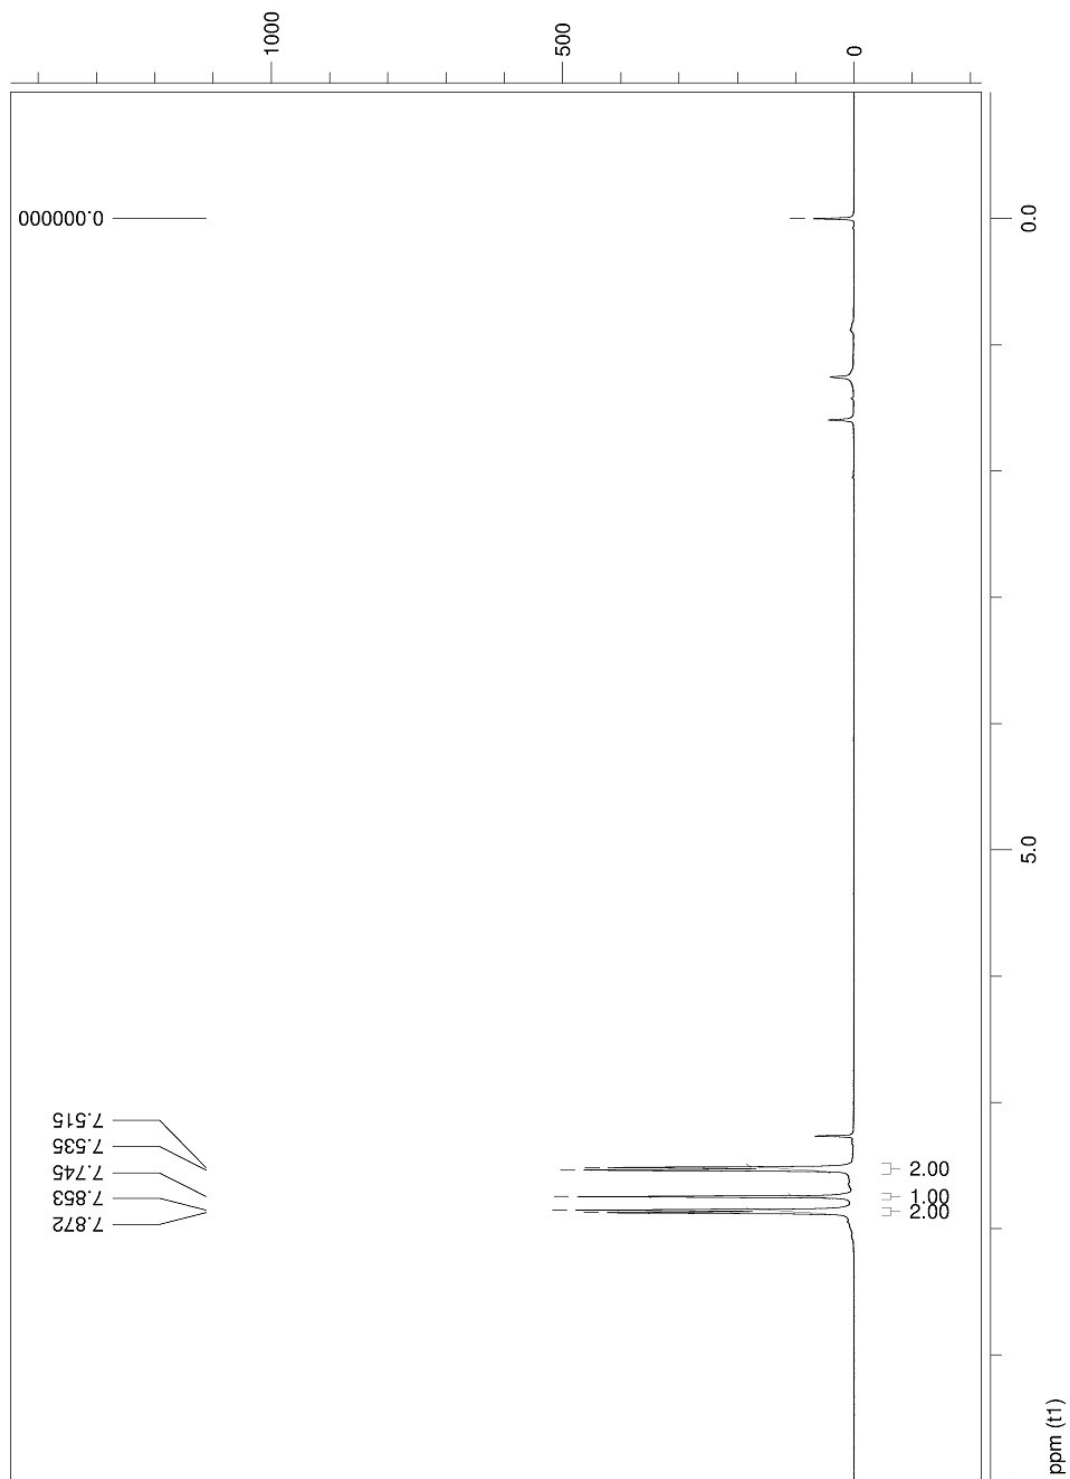

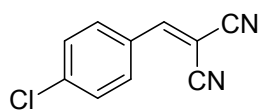

**10c**, CDCl<sub>3</sub>, 100 MHz

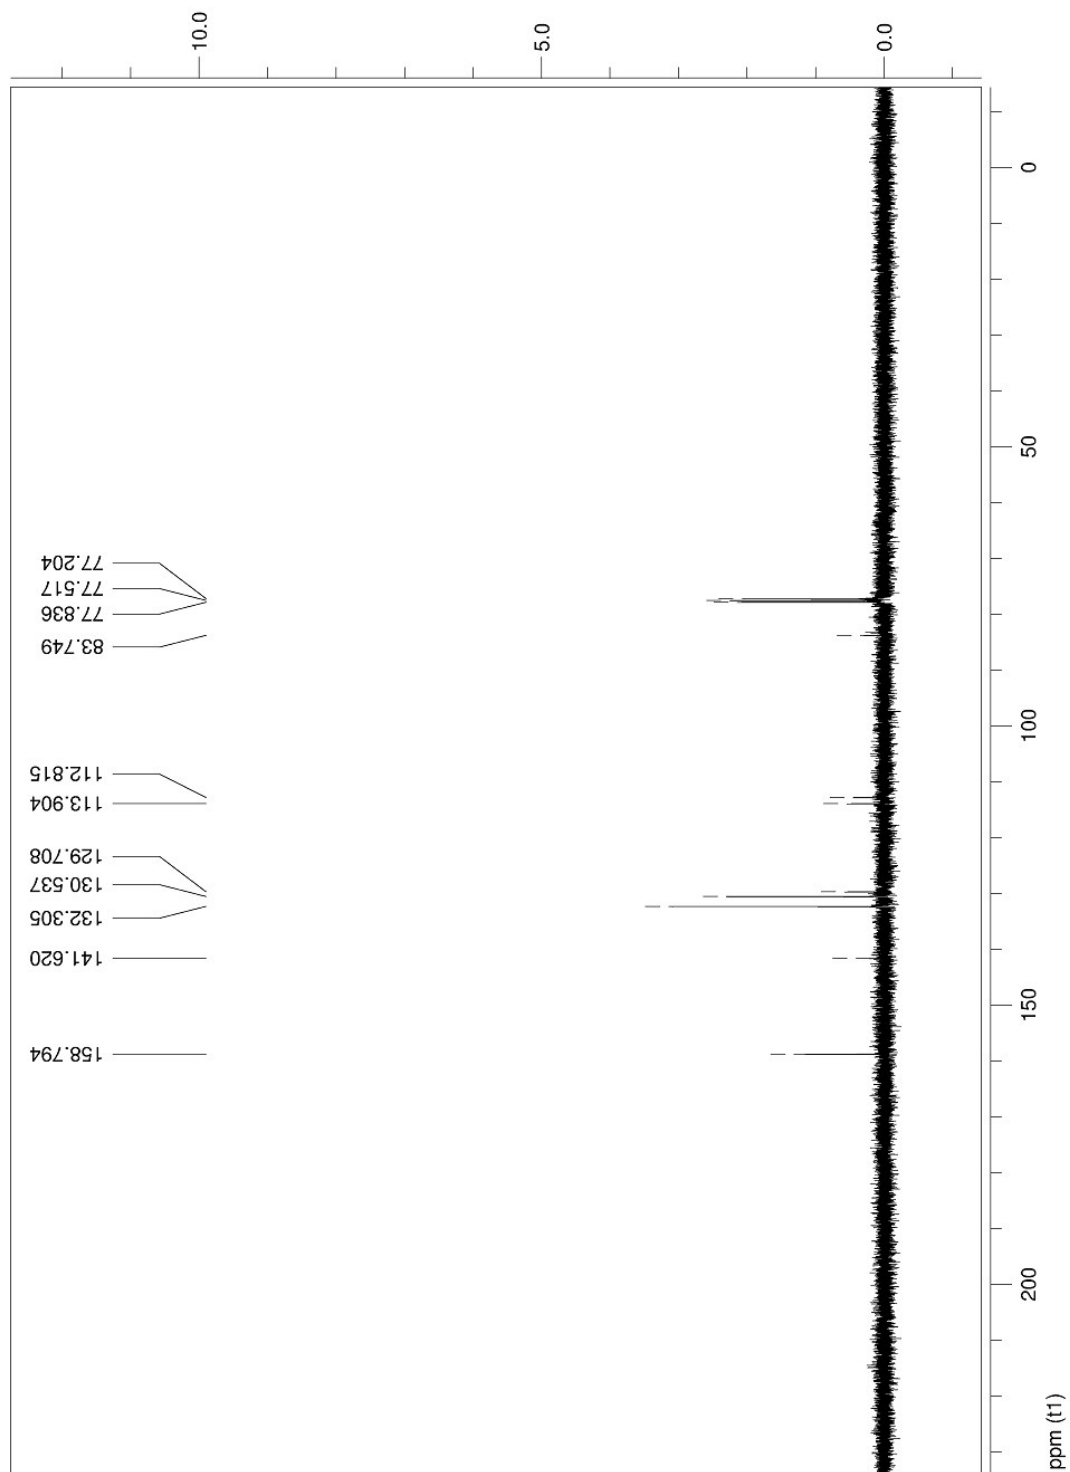

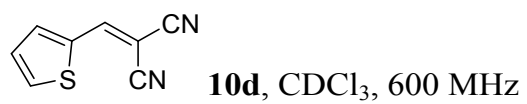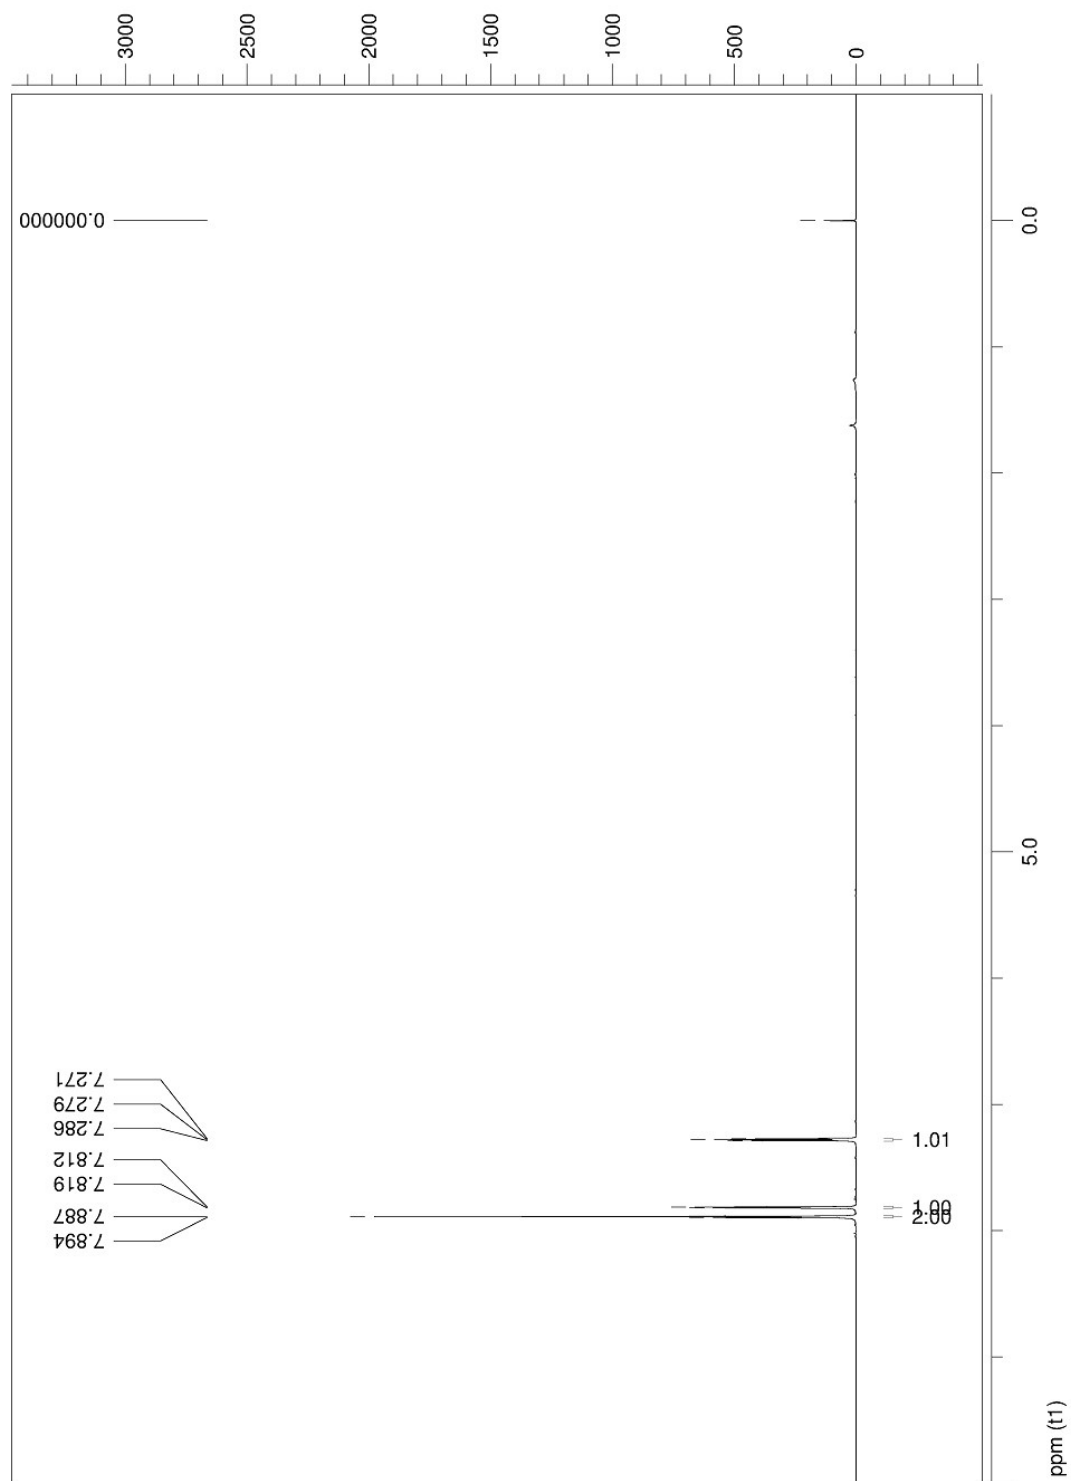

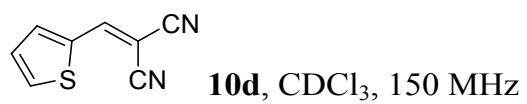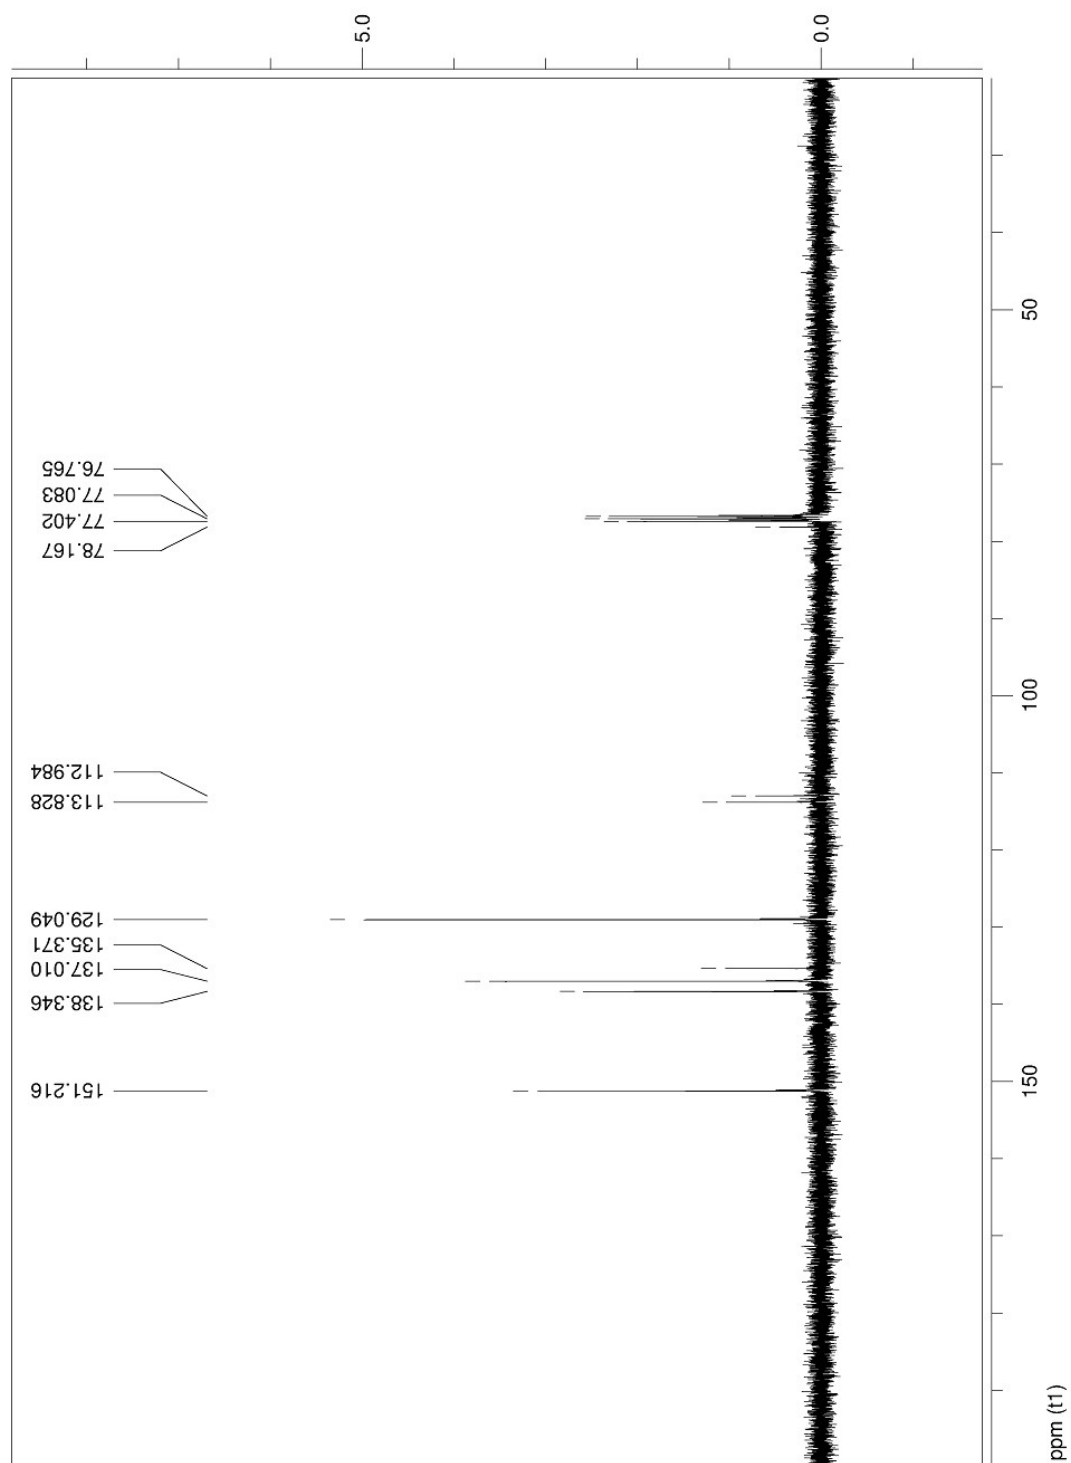

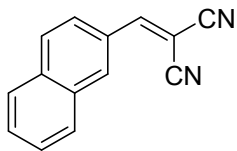

**10e**, CDCl<sub>3</sub>, 600 MHz

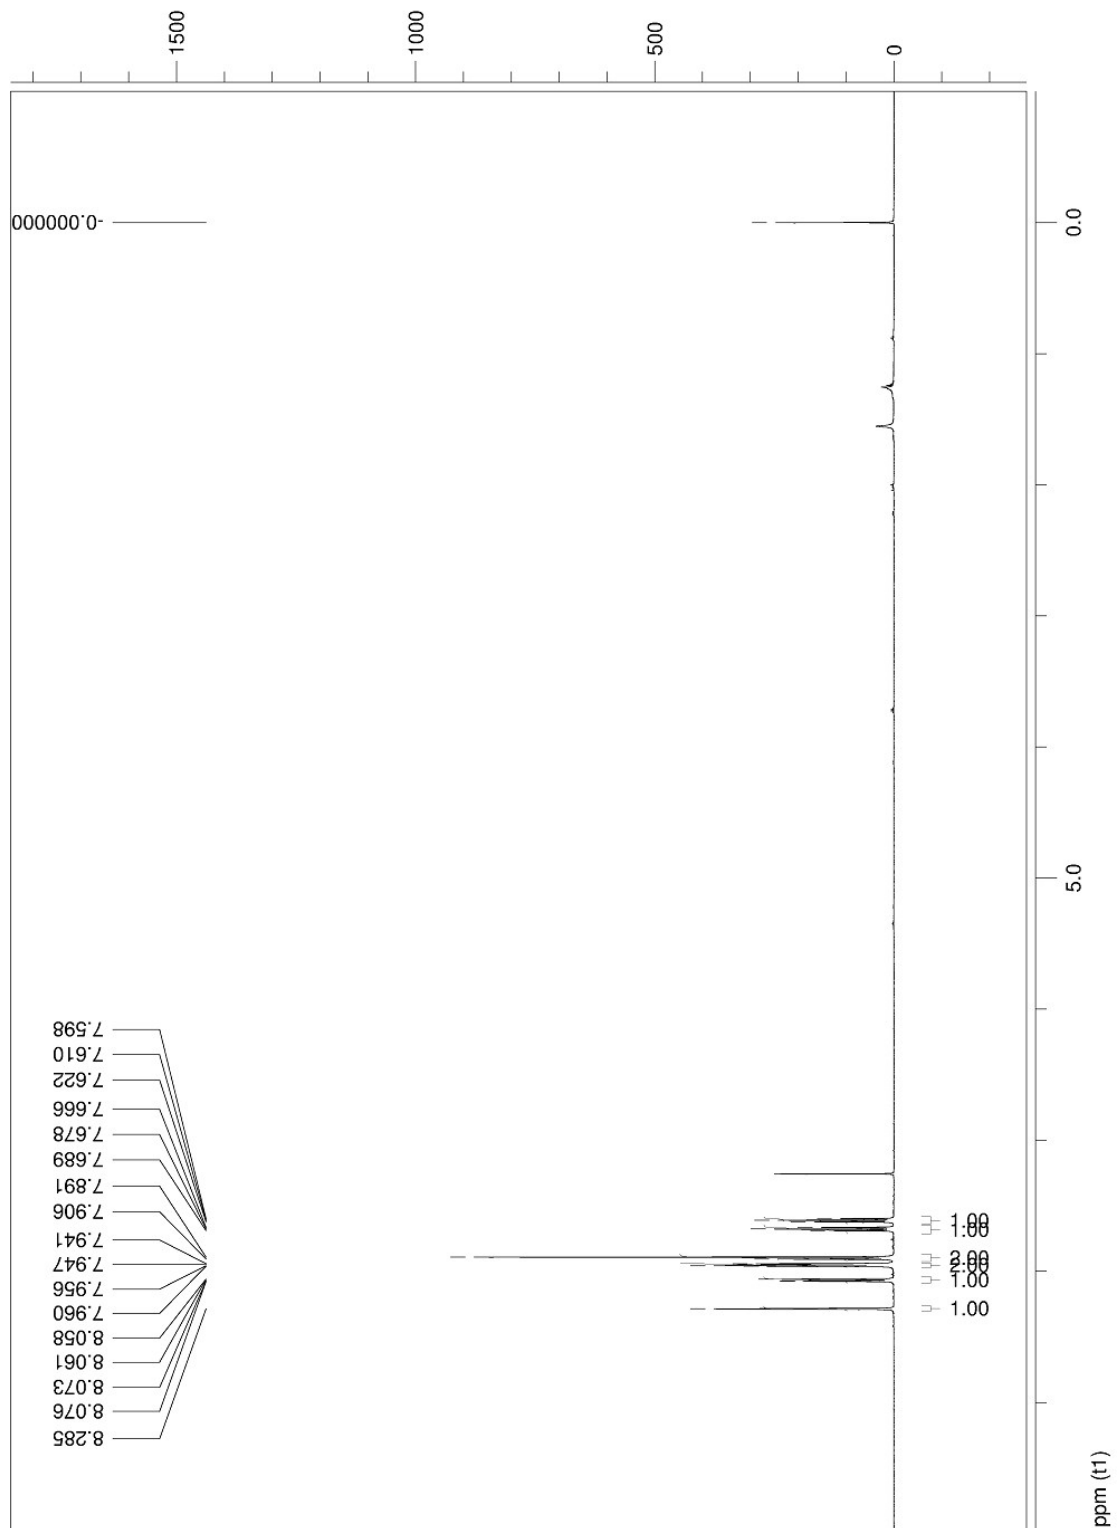



**10e**, CDCl<sub>3</sub>, 100 MHz

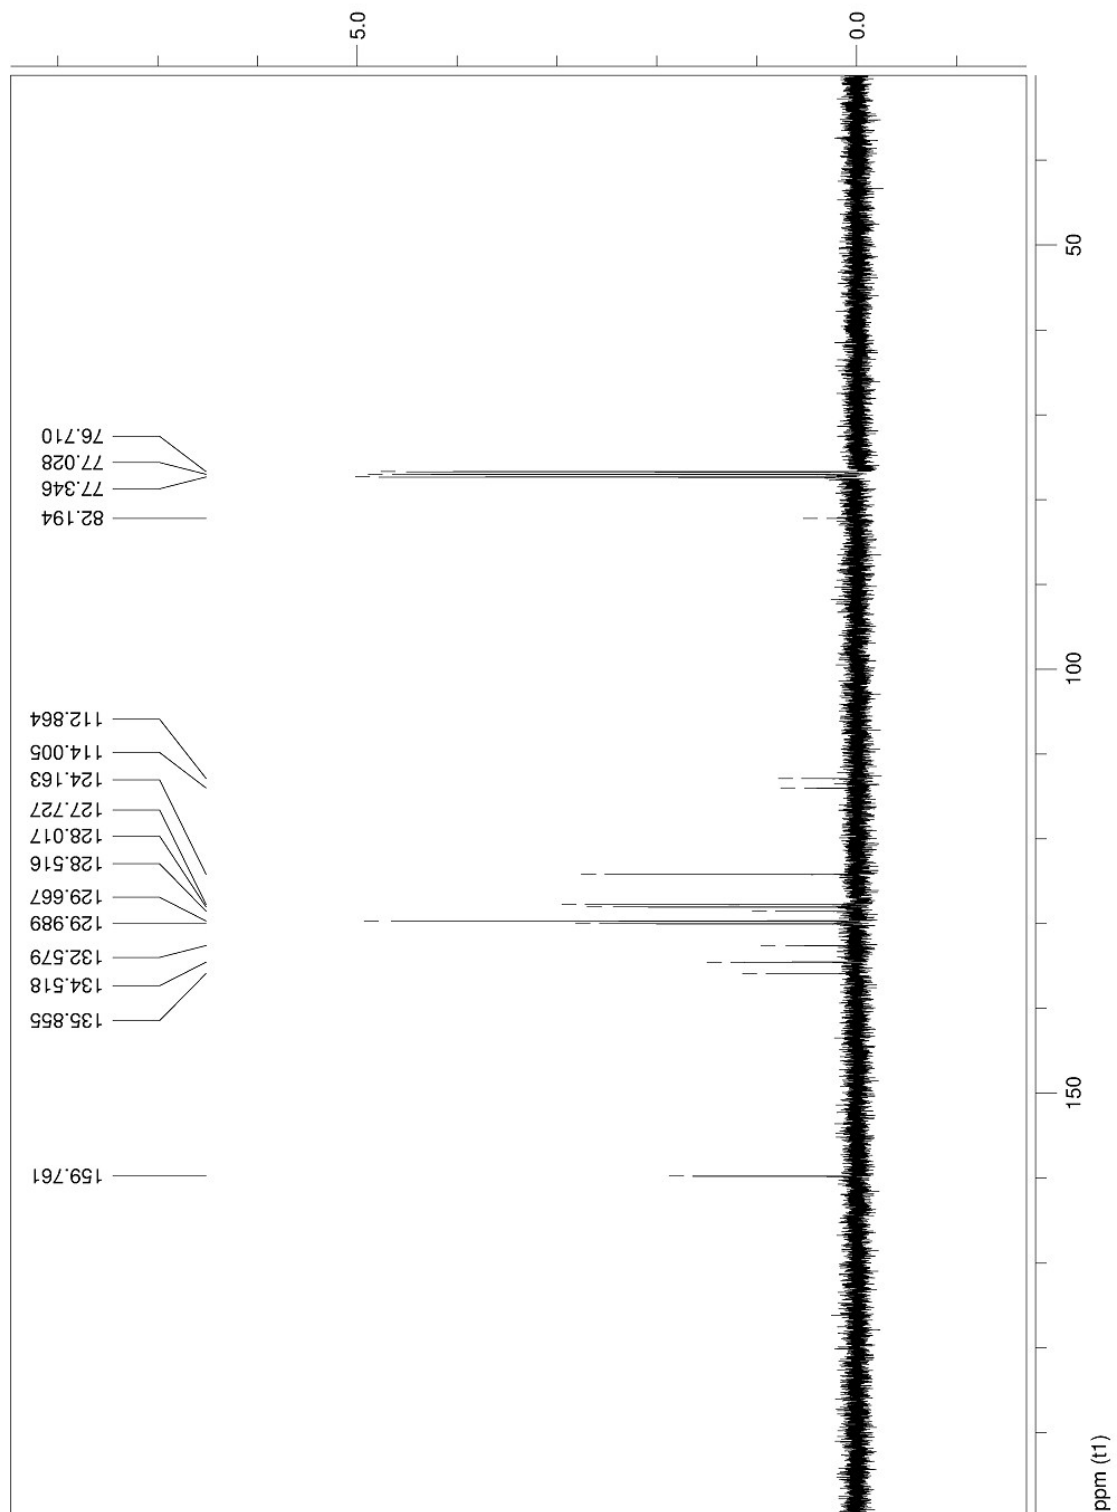



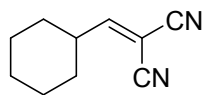

**10f**, CDCl<sub>3</sub>, 400 MHz

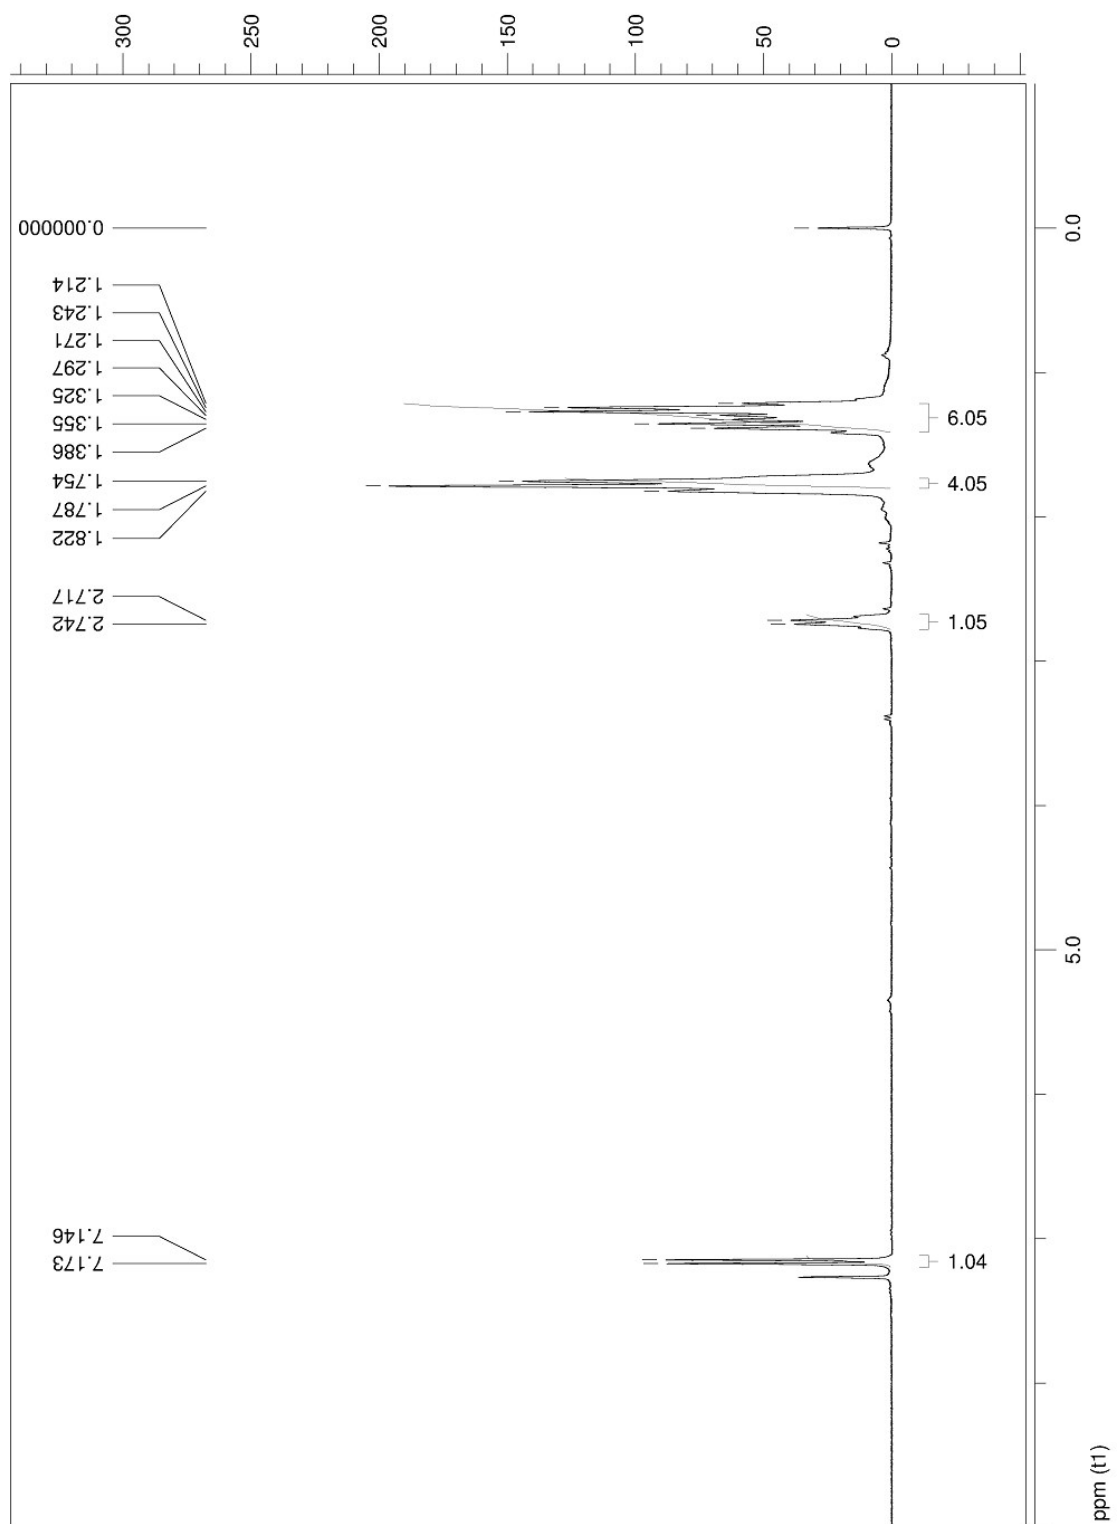

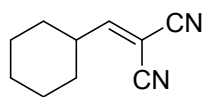

**10f**, CDCl<sub>3</sub>, 100 MHz

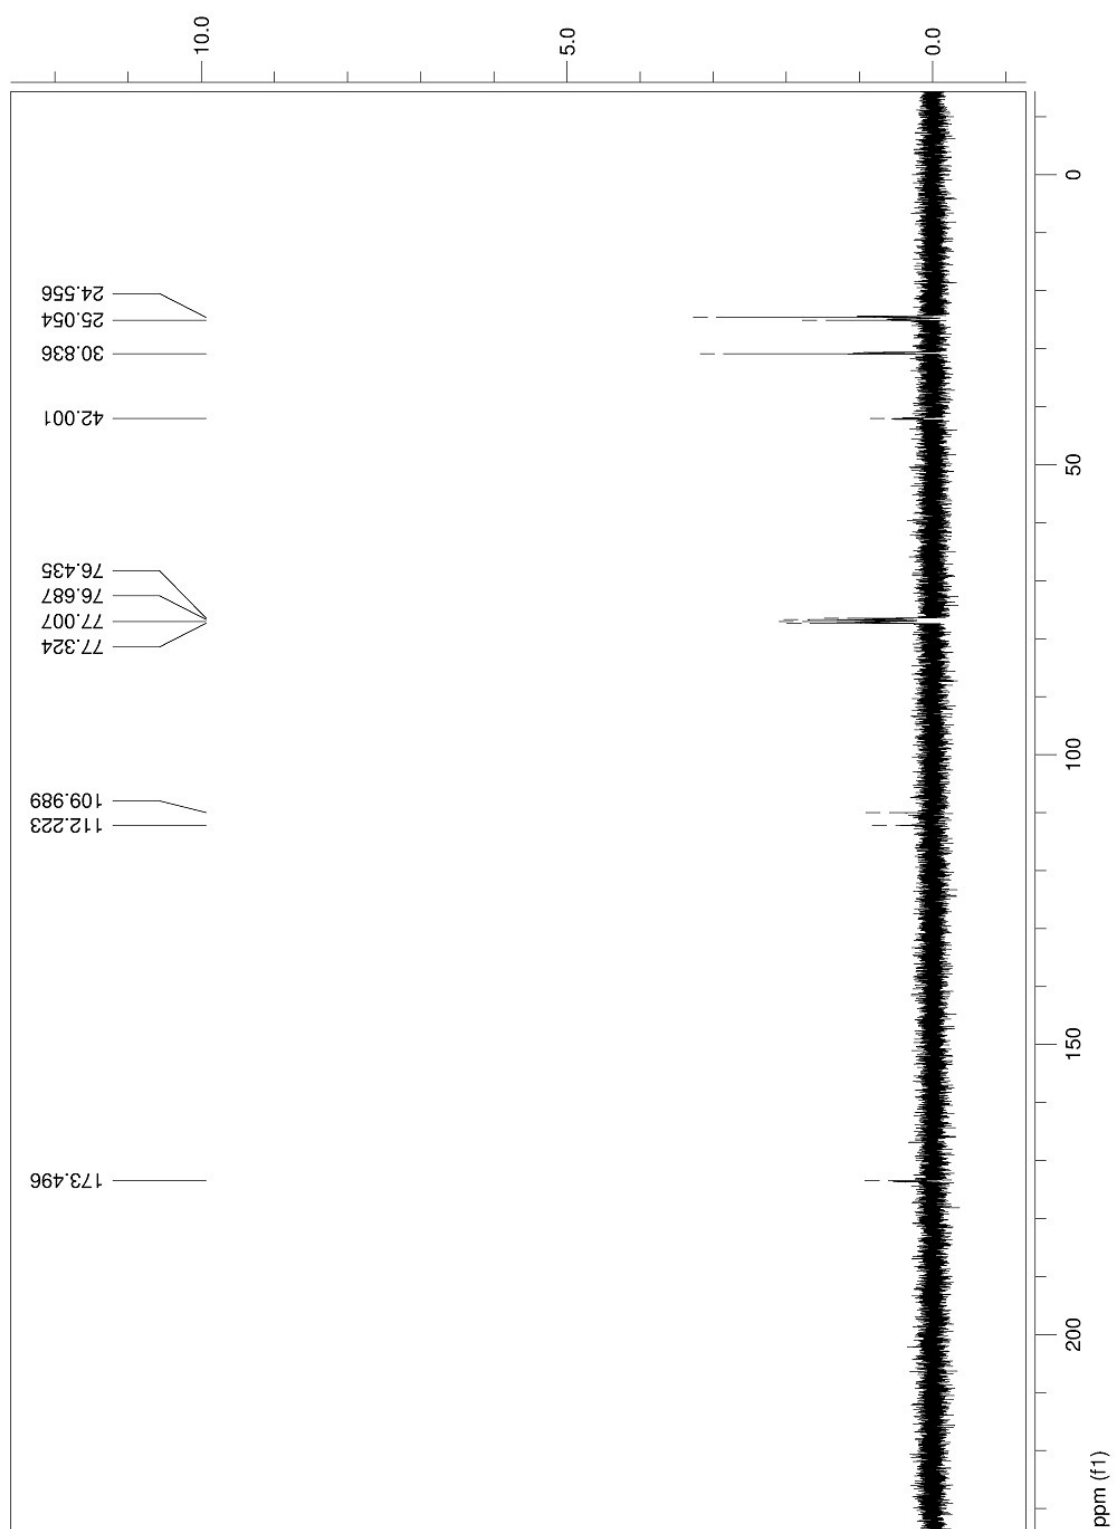

Supplement: c7ra09412d1.pdf [file c7ra09412d1.pdf]
